# Supplementary material
Source: publisher figshare collection journal article supplement (https://gsajournals.figshare.com/ndownloader/files/27743298)
Supplement: Supplementary file 1 [file 27743298]

## Sheet: Female_Liver
Liver_Female_Up														Liver_Female_Down
Sequence Name	Sequence Description	Blast Top-Hit Description (HSP)	Blast Top-Hit E-Value	Blast Top-Hit Positives	Blast Top-Hit Similarity	Blast Hit Taxonomy Name	Liver_Female_Up	logFC	logCPM	PValue	FDR			Sequence Name	Sequence Description	Blast Top-Hit Description (HSP)	Blast Top-Hit E-Value	Blast Top-Hit Positives	Blast Top-Hit Similarity	Blast Hit Taxonomy Name	Liver_Female_Down	logFC	logCPM	PValue	FDR
HYNIP00137CG0250	---NA---						HYNIP00137CG0250	8.90638	1.7224	9.11e-13	2.75e-09			HYNIP00551CG0010	guanine nucleotide-binding protein G(I)/G(S)/G(O) subunit gamma-10	gi|657576402|ref|XP_008291983.1|PREDICTED: guanine nucleotide-binding protein G(I)/G(S)/G(O) subunit gamma-10 [Stegastes partitus]/gi|657576404|ref|XP_008291984.1|PREDICTED: guanine nucleotide-binding protein G(I)/G(S)/G(O) subunit gamma-10 [Stegastes partitus]/gi|657576406|ref|XP_008291985.1|PREDICTED: guanine nucleotide-binding protein G(I)/G(S)/G(O) subunit gamma-10 [Stegastes partitus]/gi|122…	2.2e-39	68	1	Stegastes partitus/Stegastes partitus/Stegastes partitus/Acanthochromis polyacanthus/Amphiprion ocellaris	HYNIP00551CG0010	-7.7283	0.570037	4.82e-10	7.29e-07
HYNIP00892CG0030	solute carrier family 22 member 23	gi|1143407814|ref|XP_019958154.1|PREDICTED: solute carrier family 22 member 23 [Paralichthys olivaceus]	0	310	0.9573	Paralichthys olivaceus	HYNIP00892CG0030	8.21999	1.09454	1.64e-11	3.72e-08			HYNIP01512CG0030	interleukin-10 receptor subunit beta-like	gi|1348546604|ref|XP_023992382.1|interleukin-10 receptor subunit beta-like isoform X1 [Salvelinus alpinus]	1.6e-44	140	0.5301	Salvelinus alpinus	HYNIP01512CG0030	-5.30731	2.88854	2.97e-05	0.00292278
HYNIP00161CG0110	scavenger receptor cysteine-rich type 1 protein M130-like isoform X1	gi|923860434|ref|XP_013770203.1|PREDICTED: scavenger receptor cysteine-rich type 1 protein M130-like isoform X3 [Pundamilia nyererei]	0	520	0.6348	Pundamilia nyererei	HYNIP00161CG0110	7.03412	0.103822	1.67e-06	0.000379518			HYNIP00106CG0340	PDZ domain-containing protein GIPC2	gi|929070727|ref|XP_014043152.1|PREDICTED: dnaJ homolog subfamily B member 4 isoform X3 [Salmo salar]	0	320	0.9665	Salmo salar	HYNIP00106CG0340	-5.18183	3.15482	2.09e-08	1.86e-05
HYNIP00904CG0060	mutS protein homolog 5 isoform X1	gi|1137536888|ref|XP_019896235.1|PREDICTED: mutS protein homolog 5 isoform X2 [Esox lucius]	0	330	0.7767	Esox lucius	HYNIP00904CG0060	6.9323	0.0117595	3.54e-07	0.000133789			HYNIP00019CG0050	heat shock protein beta-1-like	gi|157890437|dbj|BAF80898.1|heat shock 27kDa protein 1 transcript variant 2 [Oncorhynchus mykiss]	2.3e-67	120	0.838	Oncorhynchus mykiss	HYNIP00019CG0050	-4.89986	0.440018	6.05e-06	0.000929753
HYNIP00098CG0210	ras association domain-containing protein 5 isoform X3	gi|734618721|ref|XP_010737124.1|ras association domain-containing protein 5 isoform X3 [Larimichthys crocea]	2.7e-140	240	0.8293	Larimichthys crocea	HYNIP00098CG0210	6.71494	3.84771	2.61e-06	0.000493039			HYNIP00009CG0060	kinesin-like protein KIF6	gi|1049216807|ref|XP_017546239.1|PREDICTED: kinesin-like protein KIF6 [Pygocentrus nattereri]	0	410	0.8753	Pygocentrus nattereri	HYNIP00009CG0060	-4.83944	6.01839	0.000202574	0.0124976
HYNIP00281CG0040	mutS protein homolog 4 isoform X2	gi|1469931456|ref|XP_026163752.1|LOW QUALITY PROTEIN: mutS protein homolog 4 [Mastacembelus armatus]	2.1e-157	290	0.7318	Mastacembelus armatus	HYNIP00281CG0040	6.67578	-0.190368	1.31e-07	5.93e-05			HYNIP00425CG0060	cytohesin-1-like isoform X3	gi|1317148730|ref|XP_023287057.1|cytohesin-1-like isoform X5 [Seriola lalandi dorsalis]	1.7e-84	130	0.9275	Seriola lalandi dorsalis	HYNIP00425CG0060	-4.54736	-0.577676	1.24e-05	0.00153944
HYNIP00326CG0010	MAX gene-associated protein-like isoform X1	gi|742199858|ref|XP_010893126.1|PREDICTED: MAX gene-associated protein isoform X8 [Esox lucius]	3e-09	55	0.6322	Esox lucius	HYNIP00326CG0010	6.10216	-0.607716	4.1e-06	0.000688843			HYNIP00983CG0050	unconventional myosin-Vb-like isoform X1	gi|1079790008|ref|XP_018520052.1|PREDICTED: LOW QUALITY PROTEIN: unconventional myosin-Vb [Lates calcarifer]	0	930	0.8926	Lates calcarifer	HYNIP00983CG0050	-4.45022	0.0758629	4.72e-07	0.000158584
HYNIP01524CG0010	transcription factor HES-4-B-like	gi|225706456|gb|ACO09074.1|Transcription factor HES-1 [Osmerus mordax]	0	250	1	Osmerus mordax	HYNIP01524CG0010	5.91529	0.613877	7.94e-09	9e-06			HYNIP01167CG0070	trypsin-2 isoform X4	gi|1079805622|ref|XP_018527886.1|PREDICTED: trypsin-2 isoform X3 [Lates calcarifer]	5.9e-165	230	0.9587	Lates calcarifer	HYNIP01167CG0070	-4.44461	1.24861	6.89e-07	0.000215505
HYNIP01412CG0020	farnesyl pyrophosphate synthase	gi|1250145284|ref|XP_022612451.1|farnesyl pyrophosphate synthase [Seriola dumerili]	1.1e-121	180	0.9286	Seriola dumerili	HYNIP01412CG0020	5.83878	5.42581	5.78e-07	0.000187362			HYNIP00228CG0030	NFX1-type zinc finger-containing protein 1	gi|1158871406|ref|XP_020339540.1|NFX1-type zinc finger-containing protein 1 [Oncorhynchus kisutch]	0	1400	0.7809	Oncorhynchus kisutch	HYNIP00228CG0030	-4.35108	2.75725	2.26e-08	1.86e-05
HYNIP00859CG0020	3-hydroxy-3-methylglutaryl-coenzyme A reductase-like	gi|742250521|ref|XP_010867038.1|PREDICTED: 3-hydroxy-3-methylglutaryl-Coenzyme A reductase [Esox lucius]	0	710	0.825	Esox lucius	HYNIP00859CG0020	5.65897	4.94657	1.22e-06	0.000324174			HYNIP00142CG0230	histone H1-like	gi|1520546819|ref|XP_027015553.1|histone H1-like [Tachysurus fulvidraco]	1.6e-35	93	0.93	Tachysurus fulvidraco	HYNIP00142CG0230	-4.16574	0.559225	2.28e-06	0.00047041
HYNIP00375CG0190	DEP domain-containing mTOR-interacting protein-like isoform X2	gi|742219438|ref|XP_010898785.1|PREDICTED: DEP domain-containing mTOR-interacting protein [Esox lucius]	7.1e-67	120	0.8092	Esox lucius	HYNIP00375CG0190	5.19479	6.35499	9.48e-24	8.6e-20			HYNIP00006CG0110	homeobox protein MSX-1	gi|929292433|ref|XP_014023432.1|PREDICTED: homeobox protein XHOX-7.1-like [Salmo salar]	3e-120	180	0.9474	Salmo salar	HYNIP00006CG0110	-4.11401	-0.139128	6.98e-06	0.0010382
HYNIP00231CG0190	transmembrane protease serine 7	gi|1395249644|gb|AWP20667.1|Receptor protein-tyrosine kinase [Scophthalmus maximus]	0	970	0.8153	Scophthalmus maximus	HYNIP00231CG0190	4.80894	1.60687	1.29e-06	0.000324174			HYNIP00588CG0060	nuclear factor 7, ovary-like	gi|1211307209|ref|XP_021433930.1|tripartite motif-containing protein 14-like [Oncorhynchus mykiss]	0	340	0.7176	Oncorhynchus mykiss	HYNIP00588CG0060	-3.99075	1.78356	3.74e-08	2.39e-05
HYNIP00391CG0150	phosphatidate phosphatase LPIN1 isoform X2	gi|831316873|ref|XP_012691095.1|PREDICTED: phosphatidate phosphatase LPIN1-like isoform X2 [Clupea harengus]	0	500	0.8676	Clupea harengus	HYNIP00391CG0150	4.76632	2.73842	6.95e-08	3.94e-05			HYNIP00293CG0010	rho GTPase-activating protein 39	gi|642125482|emb|CDQ61483.1|unnamed protein product [Oncorhynchus mykiss]	2.6e-142	200	0.914	Oncorhynchus mykiss	HYNIP00293CG0010	-3.87809	0.135302	7.2e-06	0.00105341
HYNIP00683CG0020	estradiol 17-beta-dehydrogenase 2	gi|1367503720|ref|XP_024235798.1|estradiol 17-beta-dehydrogenase 2 isoform X1 [Oncorhynchus tshawytscha]	6.2e-130	230	0.741	Oncorhynchus tshawytscha	HYNIP00683CG0020	4.63751	4.15034	0.000222187	0.01317			HYNIP00064CG0290	nuclear receptor subfamily 6 group A member 1	gi|1529979145|ref|XP_027133640.1|nuclear receptor subfamily 6 group A member 1 isoform X1 [Larimichthys crocea]	0	290	0.9831	Larimichthys crocea	HYNIP00064CG0290	-3.76981	0.447665	2.16e-05	0.0023343
HYNIP01000CG0020	hypothetical protein V494_05271	gi|682341589|gb|KFY36148.1|hypothetical protein V494_05271 [Pseudogymnoascus sp. VKM F-4513 (FW-928)]	9.2e-08	49	0.4851	Pseudogymnoascus sp. VKM F-4513 (FW-928)	HYNIP01000CG0020	4.57447	2.42344	1.54e-05	0.00179455			HYNIP00714CG0110	PH domain leucine-rich repeat protein phosphatase 1-like	gi|1158947415|ref|XP_020322220.1|PH domain leucine-rich repeat-containing protein phosphatase 1-like [Oncorhynchus kisutch]	0	580	0.831	Oncorhynchus kisutch	HYNIP00714CG0110	-3.57656	0.408773	0.000506876	0.0223149
HYNIP00219CG0110	late secretory pathway protein AVL9 homolog	gi|642116819|emb|CDQ67251.1|unnamed protein product [Oncorhynchus mykiss]	3.5e-40	70	0.9459	Oncorhynchus mykiss	HYNIP00219CG0110	4.35335	1.04654	3.13e-07	0.000128866			HYNIP00154CG0110	serine/threonine-protein kinase TAO3-like	gi|657562476|ref|XP_008284718.1|PREDICTED: LOW QUALITY PROTEIN: serine/threonine-protein kinase TAO3-like [Stegastes partitus]	0	300	0.9006	Stegastes partitus	HYNIP00154CG0110	-3.53079	0.215048	4.11e-05	0.00348524
HYNIP00019CG0710	7SK snRNA methylphosphate capping enzyme-like	gi|1158943057|ref|XP_020319974.1|7SK snRNA methylphosphate capping enzyme-like [Oncorhynchus kisutch]	0	530	0.711	Oncorhynchus kisutch	HYNIP00019CG0710	4.18944	-0.655338	0.000216294	0.0130197			HYNIP00003CG0690	chymotrypsin B-like	gi|355329685|dbj|BAL14136.1|chymotrypsinogen 1 [Thunnus orientalis]	8.2e-160	230	0.9315	Thunnus orientalis	HYNIP00003CG0690	-3.5305	4.64633	0.00014391	0.00952641
HYNIP00154CG0010	glycolipid transfer protein-like	gi|742214008|ref|XP_010897246.1|PREDICTED: glycolipid transfer protein [Esox lucius]	5e-94	150	0.9613	Esox lucius	HYNIP00154CG0010	4.11297	1.32979	1.53e-06	0.000374254			HYNIP00515CG0060	GRIP1-associated protein 1 isoform X1	gi|1158913853|ref|XP_020361951.1|GRIP1-associated protein 1-like isoform X2 [Oncorhynchus kisutch]	0	480	0.7169	Oncorhynchus kisutch	HYNIP00515CG0060	-3.528	0.0407678	3.1e-05	0.00300527
HYNIP00664CG0070	alanyl-tRNA editing protein Aarsd1	gi|527243151|ref|XP_005139930.1|PREDICTED: alanyl-tRNA editing protein Aarsd1, partial [Melopsittacus undulatus]	5.8e-93	160	0.7746	Melopsittacus undulatus	HYNIP00664CG0070	4.10571	5.20154	1.01e-16	4.59e-13			HYNIP00081CG0290	kinase D-interacting substrate of 220 kDa isoform X1	gi|1348540423|ref|XP_023990924.1|kinase D-interacting substrate of 220 kDa B-like isoform X2 [Salvelinus alpinus]	0	870	0.8292	Salvelinus alpinus	HYNIP00081CG0290	-3.41869	-0.676858	0.000283826	0.0155061
HYNIP00189CG0120	nephrocystin-4 isoform X2	gi|736179431|ref|XP_010768229.1|PREDICTED: nephrocystin-4-like, partial [Notothenia coriiceps]	4.7e-93	160	0.7885	Notothenia coriiceps	HYNIP00189CG0120	4.01093	-0.821279	0.000149067	0.00972581			HYNIP01169CG0020	N-terminal EF-hand calcium-binding protein 1-like	gi|1317141986|ref|XP_023283494.1|N-terminal EF-hand calcium-binding protein 1-like [Seriola lalandi dorsalis]	4e-90	140	0.94	Seriola lalandi dorsalis	HYNIP01169CG0020	-3.25845	0.802044	4.47e-05	0.0037106
HYNIP00649CG0060	stathmin-3-like	gi|225706942|gb|ACO09317.1|Stathmin-3 [Osmerus mordax]	4.3e-128	180	1	Osmerus mordax	HYNIP00649CG0060	3.94451	0.0638222	1.02e-05	0.00137629			HYNIP00174CG0120	protein asteroid homolog 1-like	gi|1211295460|ref|XP_021475895.1|protein asteroid homolog 1-like [Oncorhynchus mykiss]	0	440	0.6785	Oncorhynchus mykiss	HYNIP00174CG0120	-3.23914	3.82799	0.000551022	0.0240251
HYNIP00651CG0080	ribosomal protein S6 kinase alpha-5-like isoform X2	gi|1041107705|ref|XP_017277091.1|ribosomal protein S6 kinase alpha-5-like isoform X1 [Kryptolebias marmoratus]	0	320	0.906	Kryptolebias marmoratus	HYNIP00651CG0080	3.92063	-0.301907	3.21e-05	0.00300527			HYNIP00058CG0070	mannose-specific lectin-like	gi|831290534|ref|XP_012676764.1|PREDICTED: mannose-specific lectin-like [Clupea harengus]	8.7e-74	110	0.9576	Clupea harengus	HYNIP00058CG0070	-3.19676	0.396285	3.98e-06	0.000681674
HYNIP00007CG0590	alpha-actinin-1 isoform X2	gi|1025232749|ref|XP_016364206.1|PREDICTED: alpha-actinin-1-like isoform X2 [Sinocyclocheilus rhinocerous]	0	660	0.985	Sinocyclocheilus rhinocerous	HYNIP00007CG0590	3.91891	0.876017	3.61e-05	0.00320809			HYNIP01167CG0080	trypsin-2 isoform X4	gi|326535713|gb|ADZ76523.1|trypsinogen 1a [Epinephelus coioides]	4.6e-165	230	0.9625	Epinephelus coioides	HYNIP01167CG0080	-3.19359	5.56397	6.36e-05	0.00476374
HYNIP01348CG0030	MICOS complex subunit MIC27-like	gi|1211240144|ref|XP_021474028.1|MICOS complex subunit MIC27-like [Oncorhynchus mykiss]/gi|1211240146|ref|XP_021474029.1|MICOS complex subunit MIC27-like [Oncorhynchus mykiss]	2e-102	200	0.7799	Oncorhynchus mykiss/Oncorhynchus mykiss	HYNIP01348CG0030	3.90168	0.969424	1.27e-06	0.000324174			HYNIP00445CG0120	Na(+)/H(+) exchanger beta-like	gi|1250146275|ref|XP_022612989.1|Na(+)/H(+) exchanger beta-like [Seriola dumerili]	0	450	0.9432	Seriola dumerili	HYNIP00445CG0120	-3.19248	1.39566	3.56e-05	0.00319978
HYNIP01802CG0010	transmembrane protein 56-B-like	gi|1367526214|ref|XP_024247605.1|transmembrane protein 56-B-like isoform X2 [Oncorhynchus tshawytscha]	1.2e-62	110	0.856	Oncorhynchus tshawytscha	HYNIP01802CG0010	3.86492	3.03666	5.53e-05	0.00438154			HYNIP01374CG0010	apolipoprotein B-100-like	gi|1367440030|ref|XP_024275323.1|apolipoprotein B-100-like [Oncorhynchus tshawytscha]	0	2800	0.8364	Oncorhynchus tshawytscha	HYNIP01374CG0010	-3.16607	2.71777	8.74e-05	0.00628867
HYNIP00455CG0120	zinc metalloproteinase-disintegrin-like brevilysin H2a	gi|1211247037|ref|XP_021477647.1|zinc metalloproteinase-disintegrin-like brevilysin H2a [Oncorhynchus mykiss]	0	510	0.73	Oncorhynchus mykiss	HYNIP00455CG0120	3.76906	1.52088	1.62e-06	0.000377278			HYNIP00639CG0050	guanine nucleotide exchange factor VAV3 isoform X2	gi|795386143|ref|XP_011752201.1|guanine nucleotide exchange factor VAV3 isoform X3 [Macaca nemestrina]	2.6e-15	49	0.8305	Macaca nemestrina	HYNIP00639CG0050	-3.11944	4.10339	9.98e-08	4.76e-05
HYNIP00282CG0060	ubiquitin-associated protein 1-like	gi|929132483|ref|XP_013983075.1|PREDICTED: ubiquitin-associated protein 1-like [Salmo salar]	2.1e-177	310	0.7647	Salmo salar	HYNIP00282CG0060	3.58294	0.822333	0.000243197	0.0141397			HYNIP00379CG0020	glutamate decarboxylase 1 isoform X1	gi|1367520794|ref|XP_024244739.1|glutamate decarboxylase 1-like isoform X3 [Oncorhynchus tshawytscha]	0	560	0.9359	Oncorhynchus tshawytscha	HYNIP00379CG0020	-3.09501	0.819021	0.00011784	0.00801425
HYNIP00486CG0050	inactive hydroxysteroid dehydrogenase-like protein 1	gi|1343014481|ref|XP_023856602.1|inactive hydroxysteroid dehydrogenase-like protein 1 [Salvelinus alpinus]	5.4e-143	260	0.7741	Salvelinus alpinus	HYNIP00486CG0050	3.52989	2.45996	1.25e-06	0.000324174			HYNIP00369CG0050	galectin-2-like	gi|348511261|ref|XP_003443163.1|galectin-2 [Oreochromis niloticus]/gi|542178366|ref|XP_005468459.1|galectin-2 [Oreochromis niloticus]/gi|1434919514|ref|XP_025762564.1|galectin-2 [Oreochromis niloticus]	4.6e-66	110	0.8496	Oreochromis niloticus/Oreochromis niloticus/Oreochromis niloticus	HYNIP00369CG0050	-3.04431	4.85277	4.45e-05	0.0037106
HYNIP00068CG0420	lipoxygenase homology domain-containing protein 1-like	gi|1079710629|ref|XP_018530270.1|PREDICTED: LOW QUALITY PROTEIN: lipoxygenase homology domain-containing protein 1-like [Lates calcarifer]	0	1400	0.8522	Lates calcarifer	HYNIP00068CG0420	3.50515	1.45302	2.85e-05	0.00290721			HYNIP00171CG0350	protein 4.1-like	gi|966654140|gb|KTF88994.1|hypothetical protein cypCar_00009860, partial [Cyprinus carpio]	8e-103	150	0.9053	Cyprinus carpio	HYNIP00171CG0350	-3.04238	4.86597	3.85e-06	0.000671771
HYNIP00225CG0130	lipoprotein lipase-like	gi|1158947247|ref|XP_020322133.1|lipoprotein lipase-like [Oncorhynchus kisutch]	0	420	0.8981	Oncorhynchus kisutch	HYNIP00225CG0130	3.49554	5.90421	2.46e-08	1.86e-05			HYNIP00337CG0100	Centromere protein M	gi|1211256257|ref|XP_021412510.1|centromere protein M isoform X1 [Oncorhynchus mykiss]/gi|1211278739|ref|XP_021423405.1|centromere protein M-like isoform X1 [Oncorhynchus mykiss]/gi|642058352|emb|CDQ91091.1|unnamed protein product [Oncorhynchus mykiss]/gi|642070219|emb|CDQ88770.1|unnamed protein product [Oncorhynchus mykiss]	1.2e-104	170	0.8593	Oncorhynchus mykiss/Oncorhynchus mykiss/Oncorhynchus mykiss/Oncorhynchus mykiss	HYNIP00337CG0100	-2.98314	2.01274	1.12e-05	0.00144458
HYNIP00442CG0070	zinc transporter ZIP4-like	gi|1101522727|ref|XP_018926963.1|PREDICTED: zinc transporter ZIP4-like [Cyprinus carpio]/gi|683405542|dbj|BAP46889.1|solute carrier family 39 member 4-2 [Cyprinus carpio]	6.2e-96	320	0.4858	Cyprinus carpio/Cyprinus carpio	HYNIP00442CG0070	3.477	2.43679	2.48e-05	0.00261367			HYNIP00801CG0040	beta-adducin isoform X2	gi|1158883288|ref|XP_020345898.1|beta-adducin isoform X2 [Oncorhynchus kisutch]	0	550	0.8796	Oncorhynchus kisutch	HYNIP00801CG0040	-2.98011	2.58634	1.14e-06	0.000322084
HYNIP00798CG0020	caspase recruitment domain-containing protein 11	gi|1121866677|ref|XP_019397567.1|PREDICTED: caspase recruitment domain-containing protein 11 isoform X4 [Crocodylus porosus]	0	700	0.5818	Crocodylus porosus	HYNIP00798CG0020	3.4654	-0.638122	0.000262667	0.0147045			HYNIP00237CG0180	signal transducer and activator of transcription 1-alpha/beta-like isoform X2	gi|929257995|ref|XP_014005373.1|PREDICTED: signal transducer and activator of transcription 1 alpha isoform X3 [Salmo salar]	0	460	0.8526	Salmo salar	HYNIP00237CG0180	-2.94675	3.318	2.94e-08	2.05e-05
HYNIP00092CG0300	hydroxymethylglutaryl-CoA synthase, cytoplasmic-like isoform X3	gi|1158930764|ref|XP_020313475.1|hydroxymethylglutaryl-CoA synthase, cytoplasmic-like isoform X2 [Oncorhynchus kisutch]	0	500	0.9576	Oncorhynchus kisutch	HYNIP00092CG0300	3.44947	4.4406	0.00125629	0.04143			HYNIP01059CG0020	glycosaminoglycan xylosylkinase	gi|1250150165|ref|XP_022615116.1|glycosaminoglycan xylosylkinase isoform X1 [Seriola dumerili]	0	380	0.9242	Seriola dumerili	HYNIP01059CG0020	-2.91869	5.38107	4.5e-07	0.00015686
HYNIP00173CG0040	---NA---						HYNIP00173CG0040	3.37103	-0.696972	0.000310014	0.0164416			HYNIP01490CG0030	RING finger protein 145	gi|1468856771|ref|XP_026037820.1|RING finger protein 145 [Astatotilapia calliptera]	0	360	0.9679	Astatotilapia calliptera	HYNIP01490CG0030	-2.9099	-0.132923	0.000501032	0.0221652
HYNIP00085CG0350	coiled-coil domain-containing protein 180	gi|1158860172|ref|XP_020324218.1|coiled-coil domain-containing protein 180 isoform X4 [Oncorhynchus kisutch]	2.1e-172	330	0.7725	Oncorhynchus kisutch	HYNIP00085CG0350	3.36016	0.74121	3.46e-05	0.00313525			HYNIP00025CG0100	elastase-1-like	gi|317418748|emb|CBN80786.1|Pancreatic elastase [Dicentrarchus labrax]	2.5e-143	220	0.855	Dicentrarchus labrax	HYNIP00025CG0100	-2.82307	2.57589	0.00043021	0.0205346
HYNIP00337CG0150	keratin, type I cytoskeletal 19-like	gi|1211279242|ref|XP_021423669.1|keratin, type I cytoskeletal 19-like [Oncorhynchus mykiss]	0	360	0.7943	Oncorhynchus mykiss	HYNIP00337CG0150	3.30204	0.643059	5.59e-05	0.00438154			HYNIP00212CG0070	probable ATP-dependent RNA helicase DHX58	gi|1250109247|ref|XP_022595269.1|probable ATP-dependent RNA helicase DHX58 [Seriola dumerili]	0	570	0.8426	Seriola dumerili	HYNIP00212CG0070	-2.82043	2.47783	0.000960316	0.0353969
HYNIP00476CG0130	transient receptor potential cation channel subfamily M member 4-like	gi|742237881|ref|XP_010902871.1|PREDICTED: transient receptor potential cation channel subfamily M member 4 isoform X1 [Esox lucius]	0	340	0.7451	Esox lucius	HYNIP00476CG0130	3.29924	-0.74285	0.000556175	0.0241337			HYNIP00801CG0010	methylcytosine dioxygenase TET3-like	gi|1079799171|ref|XP_018524460.1|PREDICTED: LOW QUALITY PROTEIN: methylcytosine dioxygenase TET3-like [Lates calcarifer]	0	1000	0.6664	Lates calcarifer	HYNIP00801CG0010	-2.7937	1.67224	0.000369262	0.0184705
HYNIP00453CG0120	runt-related transcription factor 3-like isoform X1	gi|1211321681|ref|XP_021440316.1|runt-related transcription factor 3-like isoform X3 [Oncorhynchus mykiss]	4.8e-136	220	0.7899	Oncorhynchus mykiss	HYNIP00453CG0120	3.2908	-0.74705	0.000458218	0.0213107			HYNIP00414CG0050	protein FAM78A isoform X2	gi|1211360393|ref|XP_021458151.1|protein FAM78A-like isoform X2 [Oncorhynchus mykiss]/gi|1211360395|ref|XP_021458152.1|protein FAM78A-like isoform X2 [Oncorhynchus mykiss]/gi|1367504605|ref|XP_024236261.1|protein FAM78A-like isoform X3 [Oncorhynchus tshawytscha]/gi|1367504607|ref|XP_024236262.1|protein FAM78A-like isoform X3 [Oncorhynchus tshawytscha]	1.4e-171	240	0.9794	Oncorhynchus mykiss/Oncorhynchus mykiss/Oncorhynchus tshawytscha/Oncorhynchus tshawytscha	HYNIP00414CG0050	-2.7848	0.423746	2.12e-05	0.00231545
HYNIP00130CG0490	MAP3K7 C-terminal-like protein	gi|1529954604|ref|XP_027129046.1|MAP3K7 C-terminal-like protein [Larimichthys crocea]	5.7e-76	130	0.9091	Larimichthys crocea	HYNIP00130CG0490	3.2347	1.15159	0.000838657	0.0327835			HYNIP00010CG0440	lipopolysaccharide-responsive and beige-like anchor protein isoform X1	gi|1250106647|ref|XP_022593866.1|lipopolysaccharide-responsive and beige-like anchor protein isoform X5 [Seriola dumerili]	0	610	0.6822	Seriola dumerili	HYNIP00010CG0440	-2.78098	0.414068	0.00131286	0.0421577
HYNIP01725CG0020	partitioning defective 3 homolog	gi|1308437494|ref|XP_023139582.1|partitioning defective 3 homolog, partial [Amphiprion ocellaris]	9.9e-78	160	0.795	Amphiprion ocellaris	HYNIP01725CG0020	3.21697	-0.227911	0.000212843	0.0130197			HYNIP00010CG0730	ankyrin repeat and SOCS box protein 5-like isoform X2	gi|1020400403|ref|XP_016087700.1|PREDICTED: ankyrin repeat and SOCS box protein 5 isoform X2 [Sinocyclocheilus grahami]	9.5e-135	220	0.8051	Sinocyclocheilus grahami	HYNIP00010CG0730	-2.76429	0.482563	0.000407427	0.0197591
HYNIP00649CG0080	regulator of telomere elongation helicase 1	gi|1158913578|ref|XP_020361807.1|regulator of telomere elongation helicase 1 isoform X2 [Oncorhynchus kisutch]	0	520	0.8111	Oncorhynchus kisutch	HYNIP00649CG0080	3.1778	7.33082	1.99e-08	1.86e-05			HYNIP00669CG0030	zona pellucida sperm-binding protein 4-like	gi|1025117422|ref|XP_016349327.1|PREDICTED: zona pellucida sperm-binding protein 4-like [Sinocyclocheilus anshuiensis]	1.5e-107	210	0.6931	Sinocyclocheilus anshuiensis	HYNIP00669CG0030	-2.75342	13.4281	1.49e-09	1.93e-06
HYNIP00591CG0070	choline transporter-like protein 1 isoform X2	gi|1108951997|ref|XP_019120734.1|choline transporter-like protein 1 isoform X1 [Larimichthys crocea]	0	660	0.9059	Larimichthys crocea	HYNIP00591CG0070	3.16619	2.7957	5.73e-05	0.00443783			HYNIP00019CG0550	---NA---						HYNIP00019CG0550	-2.75004	0.0484055	0.00136816	0.0432329
HYNIP01585CG0050	E-selectin	gi|884980531|ref|XP_012987187.1|PREDICTED: E-selectin [Esox lucius]	1.3e-58	120	0.7349	Esox lucius	HYNIP01585CG0050	3.16417	1.49423	1.32e-05	0.00159515			HYNIP00560CG0110	alpha-mannosidase 2-like	gi|742218881|ref|XP_010898631.1|PREDICTED: alpha-mannosidase 2 [Esox lucius]	0	280	0.9293	Esox lucius	HYNIP00560CG0110	-2.74656	-0.0432984	0.000368503	0.0184705
HYNIP01950CG0010	predicted protein	gi|1188121617|ref|XP_020783475.1|zinc-binding protein A33-like [Boleophthalmus pectinirostris]	3.3e-62	150	0.5992	Boleophthalmus pectinirostris	HYNIP01950CG0010	3.15254	-0.531698	0.000465415	0.0215349			HYNIP00137CG0050	caytaxin isoform X1	gi|1497474612|gb|RMB89836.1|hypothetical protein DUI87_33851 [Hirundo rustica rustica]	0	380	0.8117	Hirundo rustica rustica	HYNIP00137CG0050	-2.73769	2.56236	2.38e-06	0.000479593
HYNIP01144CG0030	---NA---						HYNIP01144CG0030	3.11862	-0.0515137	3.89e-05	0.00335375			HYNIP00161CG0120	elongation of very long chain fatty acids protein 6-like	gi|742095432|ref|XP_010863920.1|PREDICTED: elongation of very long chain fatty acids protein 6 [Esox lucius]	4.4e-175	250	0.9299	Esox lucius	HYNIP00161CG0120	-2.72075	2.67499	0.000194834	0.0121859
HYNIP00016CG0430	squalene synthase isoform X1	gi|1468883558|ref|XP_025998663.1|squalene synthase isoform X1 [Astatotilapia calliptera]	0	360	0.943	Astatotilapia calliptera	HYNIP00016CG0430	3.08554	4.33262	0.000955068	0.0353531			HYNIP00994CG0070	zinc finger protein Gfi-1b	gi|1079757457|ref|XP_018548582.1|PREDICTED: zinc finger protein Gfi-1b [Lates calcarifer]/gi|1079757459|ref|XP_018548583.1|PREDICTED: zinc finger protein Gfi-1b [Lates calcarifer]	4.3e-168	260	0.8763	Lates calcarifer/Lates calcarifer	HYNIP00994CG0070	-2.69808	0.895452	3.8e-06	0.000671771
HYNIP00455CG0110	zinc metalloproteinase-disintegrin-like brevilysin H2a	gi|657578004|ref|XP_008292857.1|PREDICTED: disintegrin and metalloproteinase domain-containing protein 28-like [Stegastes partitus]	4.5e-58	130	0.6439	Stegastes partitus	HYNIP00455CG0110	3.08314	3.75909	7.29e-05	0.00537166			HYNIP00149CG0100	ATP-binding cassette sub-family G member 4	gi|1229005844|ref|XP_022067960.1|ATP-binding cassette sub-family G member 4 isoform X2 [Acanthochromis polyacanthus]	0	620	0.9596	Acanthochromis polyacanthus	HYNIP00149CG0100	-2.68596	2.65826	0.000256005	0.0145107
HYNIP00016CG0060	osteopetrosis-associated transmembrane protein 1-like isoform X1	gi|225707798|gb|ACO09745.1|Osteopetrosis-associated transmembrane protein 1 precursor [Osmerus mordax]	7.3e-106	160	0.8351	Osmerus mordax	HYNIP00016CG0060	3.04954	-0.889373	0.00104889	0.0374258			HYNIP01009CG0050	erythropoietin receptor-like	gi|1109490852|gb|APG32502.1|erythropoietin receptor [Plecoglossus altivelis]	0	480	0.8929	Plecoglossus altivelis	HYNIP01009CG0050	-2.68481	3.50231	9.78e-06	0.00134406
HYNIP00617CG0110	HAUS augmin-like complex subunit 5	gi|1211349076|ref|XP_021454897.1|HAUS augmin-like complex subunit 5 [Oncorhynchus mykiss]/gi|642094980|emb|CDQ79950.1|unnamed protein product [Oncorhynchus mykiss]	0	340	0.8374	Oncorhynchus mykiss/Oncorhynchus mykiss	HYNIP00617CG0110	3.02883	0.288814	0.000719846	0.0290146			HYNIP00086CG0160	piezo-type mechanosensitive ion channel component 1 isoform X1	gi|1158880654|ref|XP_020344489.1|LOW QUALITY PROTEIN: piezo-type mechanosensitive ion channel component 1-like [Oncorhynchus kisutch]	0	2100	0.8311	Oncorhynchus kisutch	HYNIP00086CG0160	-2.66813	2.08811	3.86e-05	0.00335375
HYNIP00138CG0060	anthrax toxin receptor 2-like isoform X2	gi|1169026998|ref|XP_020465506.1|anthrax toxin receptor 2-like isoform X3 [Monopterus albus]	6.3e-124	240	0.6838	Monopterus albus	HYNIP00138CG0060	3.02808	3.11361	3.16e-05	0.00300527			HYNIP00089CG0360	guanine nucleotide-binding protein G(I)/G(S)/G(O) subunit gamma-12-like	gi|929094672|ref|XP_014058161.1|PREDICTED: guanine nucleotide-binding protein G(I)/G(S)/G(O) subunit gamma-12-like [Salmo salar]/gi|929094674|ref|XP_014058163.1|PREDICTED: guanine nucleotide-binding protein G(I)/G(S)/G(O) subunit gamma-12-like [Salmo salar]/gi|929094896|ref|XP_014058281.1|PREDICTED: guanine nucleotide-binding protein G(I)/G(S)/G(O) subunit gamma-12-like [Salmo salar]	1.3e-34	65	0.9559	Salmo salar/Salmo salar/Salmo salar	HYNIP00089CG0360	-2.6424	1.47595	1.53e-05	0.00179455
HYNIP00004CG0530	sodium-dependent noradrenaline transporter	gi|1143365113|ref|XP_019935832.1|PREDICTED: sodium-dependent noradrenaline transporter [Paralichthys olivaceus]/gi|1143365115|ref|XP_019935833.1|PREDICTED: sodium-dependent noradrenaline transporter [Paralichthys olivaceus]	0	590	0.9274	Paralichthys olivaceus/Paralichthys olivaceus	HYNIP00004CG0530	3.01399	1.34723	0.000565049	0.024402			HYNIP00298CG0070	A disintegrin and metalloproteinase with thrombospondin motifs 1	gi|1367452615|ref|XP_024281988.1|A disintegrin and metalloproteinase with thrombospondin motifs 1 [Oncorhynchus tshawytscha]	0	790	0.9276	Oncorhynchus tshawytscha	HYNIP00298CG0070	-2.63615	4.11426	0.0012624	0.0414807
HYNIP00071CG0230	tuftelin-like isoform X1	gi|1079742362|ref|XP_018540568.1|PREDICTED: tuftelin-like isoform X1 [Lates calcarifer]	5.4e-151	250	0.8601	Lates calcarifer	HYNIP00071CG0230	3.01135	1.68804	0.000275763	0.015182			HYNIP00054CG0400	serine/threonine-protein kinase Chk1	gi|929218494|ref|XP_013985396.1|PREDICTED: serine/threonine-protein kinase Chk1 [Salmo salar]	0	380	0.8205	Salmo salar	HYNIP00054CG0400	-2.61278	3.43439	0.000331482	0.0170831
HYNIP01317CG0050	zinc finger with UFM1-specific peptidase domain protein-like isoform X1	gi|1367402691|ref|XP_024272355.1|zinc finger with UFM1-specific peptidase domain protein-like isoform X1 [Oncorhynchus tshawytscha]	0	480	0.7031	Oncorhynchus tshawytscha	HYNIP01317CG0050	2.86202	5.53963	5.92e-11	1.07e-07			HYNIP00841CG0060	sperm-associated antigen 5	gi|1211280294|ref|XP_021424235.1|uncharacterized protein LOC110493943 [Oncorhynchus mykiss]	0	1000	0.5662	Oncorhynchus mykiss	HYNIP00841CG0060	-2.60671	2.41377	0.000817396	0.0321281
HYNIP00047CG0500	Os08g0530033	gi|937931468|dbj|BAT06384.1|Os08g0530033 [Oryza sativa Japonica Group]	1.2e-07	33	0.7174	Oryza sativa Japonica Group	HYNIP00047CG0500	2.80028	2.27354	2.52e-05	0.00262405			HYNIP00791CG0040	NAD kinase 2, mitochondrial isoform X3	gi|1342954066|ref|XP_023839443.1|NAD kinase 2, mitochondrial isoform X3 [Salvelinus alpinus]	1.9e-176	290	0.7494	Salvelinus alpinus	HYNIP00791CG0040	-2.56829	2.55656	0.000608895	0.0259252
HYNIP00174CG0300	regulator of G-protein signaling protein-like	gi|929294627|ref|XP_014024599.1|PREDICTED: regulator of G-protein signaling protein-like isoform X2 [Salmo salar]	2.3e-150	350	0.5942	Salmo salar	HYNIP00174CG0300	2.74025	4.59697	3.21e-05	0.00300527			HYNIP01046CG0010	protein Niban	gi|929122760|ref|XP_013978997.1|PREDICTED: protein Niban [Salmo salar]	0	640	0.5736	Salmo salar	HYNIP01046CG0010	-2.56186	2.81245	3.44e-05	0.00313525
HYNIP00019CG0960	transcription initiation factor TFIID subunit 6	gi|1250156004|ref|XP_022618287.1|transcription initiation factor TFIID subunit 6 [Seriola dumerili]	0	590	0.8603	Seriola dumerili	HYNIP00019CG0960	2.72042	1.91602	3.11e-06	0.000576446			HYNIP00075CG0200	carboxypeptidase B	gi|213512847|ref|NP_001134726.1|Carboxypeptidase B precursor [Salmo salar]/gi|209735482|gb|ACI68610.1|Carboxypeptidase B precursor [Salmo salar]	0	360	0.8732	Salmo salar/Salmo salar	HYNIP00075CG0200	-2.5559	3.05248	2.22e-06	0.000469154
HYNIP00286CG0060	---NA---						HYNIP00286CG0060	2.70978	-0.120057	0.000400453	0.0195253			HYNIP00570CG0080	Krueppel-like factor 4	gi|1343062186|ref|XP_023833775.1|Krueppel-like factor 4 [Salvelinus alpinus]	0	340	0.787	Salvelinus alpinus	HYNIP00570CG0080	-2.54215	1.51716	4.54e-06	0.000712667
HYNIP00287CG0060	GTPase IMAP family member 8-like isoform X1	gi|1250163824|ref|XP_022622565.1|uncharacterized protein LOC111237664 [Seriola dumerili]/gi|1250163826|ref|XP_022622566.1|uncharacterized protein LOC111237664 [Seriola dumerili]	0	510	0.6751	Seriola dumerili/Seriola dumerili	HYNIP00287CG0060	2.70689	5.10482	9.64e-08	4.76e-05			HYNIP01455CG0030	E3 ubiquitin/ISG15 ligase TRIM25-like isoform X2	gi|1514789766|gb|ROI15662.1|E3 ubiquitin/ISG15 ligase TRIM25 [Anabarilius grahami]	0	380	0.7223	Anabarilius grahami	HYNIP01455CG0030	-2.4961	2.9606	2.3e-05	0.00245285
HYNIP00455CG0050	two pore calcium channel protein 1 isoform X1	gi|1367476195|ref|XP_024294362.1|two pore calcium channel protein 1 isoform X1 [Oncorhynchus tshawytscha]	0	760	0.9108	Oncorhynchus tshawytscha	HYNIP00455CG0050	2.7048	4.05477	3.95e-08	2.39e-05			HYNIP01106CG0060	T-cell acute lymphocytic leukemia protein 1-like isoform X2	gi|1343061679|ref|XP_023833511.1|T-cell acute lymphocytic leukemia protein 1-like [Salvelinus alpinus]	3e-136	270	0.7417	Salvelinus alpinus	HYNIP01106CG0060	-2.4937	1.49268	0.000152777	0.00989666
HYNIP00635CG0070	tumor necrosis factor ligand superfamily member 15-like	gi|1367506089|ref|XP_024237068.1|tumor necrosis factor ligand superfamily member 15-like [Oncorhynchus tshawytscha]	5.9e-33	120	0.5345	Oncorhynchus tshawytscha	HYNIP00635CG0070	2.69593	0.82268	0.000118415	0.00801425			HYNIP00777CG0050	serine/threonine-protein kinase PLK3	gi|1317099980|ref|XP_023261221.1|serine/threonine-protein kinase PLK3 [Seriola lalandi dorsalis]	0	560	0.9414	Seriola lalandi dorsalis	HYNIP00777CG0050	-2.43295	1.20752	0.00130773	0.0421577
HYNIP00093CG0390	---NA---						HYNIP00093CG0390	2.66299	0.539799	0.000477836	0.0218863			HYNIP00767CG0100	FH2 domain-containing protein 1-like	gi|1348552153|ref|XP_023993637.1|FH2 domain-containing protein 1-like [Salvelinus alpinus]	0	570	0.5661	Salvelinus alpinus	HYNIP00767CG0100	-2.43211	2.27808	4.56e-06	0.000712667
HYNIP00122CG0130	tumor necrosis factor alpha-induced protein 2-like	gi|1169033923|ref|XP_020469208.1|exocyst complex component 3-like [Monopterus albus]	0	640	0.6905	Monopterus albus	HYNIP00122CG0130	2.64269	0.898785	0.00037437	0.0184705			HYNIP00445CG0130	gap junction alpha-9 protein-like	gi|1168986233|ref|XP_020453368.1|gap junction alpha-9 protein-like [Monopterus albus]	0	420	0.8111	Monopterus albus	HYNIP00445CG0130	-2.42577	1.27613	0.00045161	0.0211116
HYNIP00011CG0670	retinal dehydrogenase 2	gi|1308440068|ref|XP_023140974.1|retinal dehydrogenase 2 [Amphiprion ocellaris]	0	480	0.9208	Amphiprion ocellaris	HYNIP00011CG0670	2.61915	-0.371311	0.00154545	0.0475108			HYNIP00354CG0030	dnaJ homolog subfamily B member 1	gi|657760778|ref|XP_008315465.1|dnaJ homolog subfamily B member 1 [Cynoglossus semilaevis]	5.9e-175	300	0.8159	Cynoglossus semilaevis	HYNIP00354CG0030	-2.39642	5.09728	0.000778901	0.0309818
HYNIP00197CG0280	OTU domain-containing protein 5 isoform X2	gi|929249220|ref|XP_014000782.1|PREDICTED: OTU domain-containing protein 5-A-like isoform X1 [Salmo salar]/gi|929249222|ref|XP_014000784.1|PREDICTED: OTU domain-containing protein 5-A-like isoform X1 [Salmo salar]	2.9e-159	250	0.7404	Salmo salar/Salmo salar	HYNIP00197CG0280	2.60897	5.63635	1.27e-05	0.00155269			HYNIP00847CG0030	Krueppel-like factor 1	gi|929219898|ref|XP_013986126.1|PREDICTED: zinc finger protein 120-like [Salmo salar]/gi|929219900|ref|XP_013986127.1|PREDICTED: zinc finger protein 120-like [Salmo salar]	3.9e-150	280	0.7045	Salmo salar/Salmo salar	HYNIP00847CG0030	-2.39601	2.64807	0.000244782	0.0141397
HYNIP00138CG0070	progestin and adipoQ receptor family member 3-like	gi|1503274059|ref|XP_026798531.1|progestin and adipoQ receptor family member 3-like [Pangasianodon hypophthalmus]	0	270	0.8835	Pangasianodon hypophthalmus	HYNIP00138CG0070	2.60787	3.68688	4.29e-06	0.000695555			HYNIP00429CG0010	dihydropyrimidinase-related protein 5	gi|1357722143|ref|XP_024147679.1|dihydropyrimidinase-related protein 5 [Oryzias melastigma]	0	340	0.7246	Oryzias melastigma	HYNIP00429CG0010	-2.3918	5.19196	7.58e-08	4.04e-05
HYNIP00163CG0250	PDZ and LIM domain protein 2-like	gi|972948626|ref|XP_015196203.1|PREDICTED: PDZ and LIM domain protein 2 isoform X1 [Lepisosteus oculatus]	5.2e-12	110	0.4397	Lepisosteus oculatus	HYNIP00163CG0250	2.60757	0.96327	0.000235548	0.0138713			HYNIP01108CG0040	erythropoietin-like isoform X1	gi|1367405234|ref|XP_024259870.1|erythropoietin-like isoform X1 [Oncorhynchus tshawytscha]	8.4e-87	150	0.8315	Oncorhynchus tshawytscha	HYNIP01108CG0040	-2.39168	4.66208	2.44e-06	0.000480891
HYNIP00024CG0110	lens fiber major intrinsic protein-like	gi|1395238024|gb|AWP09633.1|Aquaporin-0a [Scophthalmus maximus]	4.2e-167	240	0.9316	Scophthalmus maximus	HYNIP00024CG0110	2.59218	-0.417769	0.00148476	0.0459565			HYNIP00702CG0020	chymotrypsin-like elastase family member 2A	gi|1007781459|ref|XP_015827876.1|PREDICTED: chymotrypsin-like elastase family member 2A [Nothobranchius furzeri]	9.3e-166	240	0.8922	Nothobranchius furzeri	HYNIP00702CG0020	-2.38273	2.24105	0.000951997	0.0353531
HYNIP01427CG0020	ras-GEF domain-containing family member 1C isoform X1	gi|736300713|ref|XP_010793003.1|PREDICTED: ras-GEF domain-containing family member 1C [Notothenia coriiceps]	5.6e-106	180	0.8768	Notothenia coriiceps	HYNIP01427CG0020	2.58713	0.443575	0.00044036	0.0207317			HYNIP00847CG0040	ral guanine nucleotide dissociation stimulator-like 1	gi|1211260716|ref|XP_021414875.1|ral guanine nucleotide dissociation stimulator-like 1, partial [Oncorhynchus mykiss]	1.1e-163	370	0.5773	Oncorhynchus mykiss	HYNIP00847CG0040	-2.37815	2.66766	3.92e-05	0.00335375
HYNIP00217CG0240	Peroxisomal membrane protein 11C	gi|225706938|gb|ACO09315.1|Peroxisomal membrane protein 11C [Osmerus mordax]	3e-148	210	0.977	Osmerus mordax	HYNIP00217CG0240	2.58069	1.68607	0.000352358	0.0178521			HYNIP00753CG0040	cell division cycle-associated protein 2 isoform X1	gi|1317158393|ref|XP_023253315.1|cell division cycle-associated protein 2-like isoform X2 [Seriola lalandi dorsalis]	2.6e-96	460	0.4633	Seriola lalandi dorsalis	HYNIP00753CG0040	-2.3776	0.646952	0.000621256	0.0262055
HYNIP01119CG0050	Peptidyl-prolyl cis-trans isomerase B	gi|1515228436|gb|ROL54671.1|Peptidyl-prolyl cis-trans isomerase B [Anabarilius grahami]	3.4e-143	210	0.9676	Anabarilius grahami	HYNIP01119CG0050	2.55325	6.03643	1.79e-05	0.00202376			HYNIP00149CG0200	signal-induced proliferation-associated 1-like protein 3 isoform X1	gi|929083671|ref|XP_014052369.1|PREDICTED: signal-induced proliferation-associated 1-like protein 3 isoform X1 [Salmo salar]/gi|929083673|ref|XP_014052370.1|PREDICTED: signal-induced proliferation-associated 1-like protein 3 isoform X1 [Salmo salar]/gi|929083675|ref|XP_014052371.1|PREDICTED: signal-induced proliferation-associated 1-like protein 3 isoform X1 [Salmo salar]	7.5e-134	310	0.631	Salmo salar/Salmo salar/Salmo salar	HYNIP00149CG0200	-2.36756	0.322522	0.000467949	0.0215423
HYNIP00016CG0420	cathepsin B-like	gi|225708580|gb|ACO10136.1|Cathepsin B precursor [Osmerus mordax]	0	310	0.9364	Osmerus mordax	HYNIP00016CG0420	2.54902	2.2877	0.00021678	0.0130197			HYNIP00050CG0040	Mitogen-activated protein kinase kinase kinase 13	gi|1515188359|gb|ROL46397.1|Mitogen-activated protein kinase kinase kinase 13 [Anabarilius grahami]	0	410	0.8316	Anabarilius grahami	HYNIP00050CG0040	-2.3623	1.22954	9.18e-05	0.00650216
HYNIP00114CG0060	tripartite motif-containing protein 16	gi|1079750624|ref|XP_018544977.1|PREDICTED: LOW QUALITY PROTEIN: tripartite motif-containing protein 16-like protein [Lates calcarifer]	0	480	0.7924	Lates calcarifer	HYNIP00114CG0060	2.51754	4.14823	1.38e-07	5.97e-05			HYNIP00002CG0810	endothelial transcription factor GATA-2-like	gi|1367427985|ref|XP_024237174.1|endothelial transcription factor GATA-2-like [Oncorhynchus tshawytscha]	0	380	0.8826	Oncorhynchus tshawytscha	HYNIP00002CG0810	-2.36177	3.12338	1.77e-06	0.000381629
HYNIP00269CG0060	Inhibitor of growth protein 2	gi|225708224|gb|ACO09958.1|Inhibitor of growth protein 2 [Osmerus mordax]	1.1e-153	240	0.9278	Osmerus mordax	HYNIP00269CG0060	2.51615	1.04723	0.00105233	0.0374258			HYNIP00566CG0050	sterile alpha motif domain-containing protein 11 isoform X2	gi|1079792707|ref|XP_018521509.1|PREDICTED: sterile alpha motif domain-containing protein 11 isoform X2 [Lates calcarifer]	0	830	0.7988	Lates calcarifer	HYNIP00566CG0050	-2.36091	1.8255	8.1e-05	0.00592654
HYNIP00514CG0040	sterol-4-alpha-carboxylate 3-dehydrogenase, decarboxylating	gi|1367402651|ref|XP_024272334.1|sterol-4-alpha-carboxylate 3-dehydrogenase, decarboxylating-like [Oncorhynchus tshawytscha]	0	330	0.9536	Oncorhynchus tshawytscha	HYNIP00514CG0040	2.49849	4.45945	0.000669797	0.027737			HYNIP00047CG0280	angiomotin-like 2a	gi|1250167303|ref|XP_022624481.1|angiomotin-like 2a [Seriola dumerili]	0	580	0.8161	Seriola dumerili	HYNIP00047CG0280	-2.33992	0.779367	0.0012435	0.0413086
HYNIP00049CG0310	pleiotropic regulator 1	gi|1158896231|ref|XP_020352769.1|pleiotropic regulator 1-like [Oncorhynchus kisutch]	0	490	0.9569	Oncorhynchus kisutch	HYNIP00049CG0310	2.49137	9.32651	4.34e-07	0.00015686			HYNIP01581CG0070	Fc receptor-like protein 5	gi|1211278632|ref|XP_021423352.1|Fc receptor-like protein 1 [Oncorhynchus mykiss]	5.5e-74	160	0.6983	Oncorhynchus mykiss	HYNIP01581CG0070	-2.32871	0.713911	0.0010245	0.0367243
HYNIP00024CG0100	nuclear receptor coactivator 3-like	gi|929249596|ref|XP_014000983.1|PREDICTED: nuclear receptor coactivator 3-like isoform X1 [Salmo salar]/gi|929249598|ref|XP_014000985.1|PREDICTED: nuclear receptor coactivator 3-like isoform X1 [Salmo salar]/gi|929249600|ref|XP_014000986.1|PREDICTED: nuclear receptor coactivator 3-like isoform X1 [Salmo salar]/gi|929249602|ref|XP_014000987.1|PREDICTED: nuclear receptor coactivator 3-like isoform …	0	1300	0.8571	Salmo salar/Salmo salar/Salmo salar/Salmo salar/Salmo salar/Salmo salar/Salmo salar/Salmo salar	HYNIP00024CG0100	2.42268	3.92478	1.13e-05	0.00144469			HYNIP00152CG0280	small RNA 2'-O-methyltransferase	gi|929122432|ref|XP_013978821.1|PREDICTED: small RNA 2'-O-methyltransferase [Salmo salar]	2e-155	290	0.7243	Salmo salar	HYNIP00152CG0280	-2.31887	2.58066	0.000173353	0.010994
HYNIP00005CG0150	serine/threonine-protein kinase ULK2-like isoform X1	gi|742194466|ref|XP_010891565.1|PREDICTED: serine/threonine-protein kinase ULK2 isoform X1 [Esox lucius]	0	960	0.854	Esox lucius	HYNIP00005CG0150	2.39703	5.08131	3.8e-06	0.000671771			HYNIP01169CG0030	tetratricopeptide repeat protein 34 isoform X1	gi|929230984|ref|XP_013992045.1|PREDICTED: tetratricopeptide repeat protein 34 isoform X2 [Salmo salar]	0	920	0.8148	Salmo salar	HYNIP01169CG0030	-2.30551	3.28268	0.000115407	0.007929
HYNIP00646CG0090	RING finger protein 166	gi|688565640|ref|XP_009301765.1|RING finger protein 166 [Danio rerio]	1.6e-127	200	0.8264	Danio rerio	HYNIP00646CG0090	2.39688	0.723853	0.000597292	0.0255511			HYNIP00113CG0170	septin-7 isoform X4	gi|664704407|ref|XP_008534192.1|PREDICTED: septin-7 [Equus przewalskii]	3.3e-83	120	0.9919	Equus przewalskii	HYNIP00113CG0170	-2.29906	0.0351413	0.00110155	0.0382756
HYNIP00182CG0130	TSC22 domain family protein 1-like isoform X3	gi|929303835|ref|XP_014029399.1|PREDICTED: TSC22 domain family protein 1 isoform X4 [Salmo salar]	1.4e-72	120	0.8864	Salmo salar	HYNIP00182CG0130	2.39636	4.71995	3.73e-05	0.00328545			HYNIP00658CG0130	transforming acidic coiled-coil-containing protein 3-like isoform X1	gi|929109920|ref|XP_014066230.1|PREDICTED: transforming acidic coiled-coil-containing protein 3-like isoform X1 [Salmo salar]/gi|929109922|ref|XP_014066231.1|PREDICTED: transforming acidic coiled-coil-containing protein 3-like isoform X1 [Salmo salar]	0	600	0.6168	Salmo salar/Salmo salar	HYNIP00658CG0130	-2.29652	2.90428	8.27e-06	0.00115422
HYNIP00664CG0100	proteasome activator complex subunit 3	gi|742095797|ref|XP_010864862.1|PREDICTED: proteasome activator complex subunit 3 isoform X2 [Esox lucius]	5.1e-146	210	0.9593	Esox lucius	HYNIP00664CG0100	2.38552	2.2154	1.99e-05	0.00220324			HYNIP00064CG0120	endoplasmic reticulum mannosyl-oligosaccharide 1,2-alpha-mannosidase	gi|1343018307|ref|XP_023858673.1|endoplasmic reticulum mannosyl-oligosaccharide 1,2-alpha-mannosidase [Salvelinus alpinus]/gi|1343018309|ref|XP_023858674.1|endoplasmic reticulum mannosyl-oligosaccharide 1,2-alpha-mannosidase [Salvelinus alpinus]/gi|1343018311|ref|XP_023858675.1|endoplasmic reticulum mannosyl-oligosaccharide 1,2-alpha-mannosidase [Salvelinus alpinus]	0	580	0.8725	Salvelinus alpinus/Salvelinus alpinus/Salvelinus alpinus	HYNIP00064CG0120	-2.28821	1.33782	0.0013016	0.0421577
HYNIP00275CG0080	acyl-CoA-binding domain-containing protein 4 isoform X1	gi|1168879285|ref|XP_020496041.1|acyl-CoA-binding domain-containing protein 4-like isoform X1 [Labrus bergylta]/gi|1168879287|ref|XP_020496043.1|acyl-CoA-binding domain-containing protein 4-like isoform X1 [Labrus bergylta]/gi|1168879289|ref|XP_020496052.1|acyl-CoA-binding domain-containing protein 4-like isoform X1 [Labrus bergylta]	1e-127	260	0.706	Labrus bergylta/Labrus bergylta/Labrus bergylta	HYNIP00275CG0080	2.36013	1.41485	0.00131554	0.0421577			HYNIP00032CG0250	---NA---						HYNIP00032CG0250	-2.27718	2.08418	4.94e-05	0.00396224
HYNIP00161CG0300	kelch-like protein 11	gi|642118618|emb|CDQ66083.1|unnamed protein product [Oncorhynchus mykiss]	0	620	0.9178	Oncorhynchus mykiss	HYNIP00161CG0300	2.33254	5.46674	3.4e-05	0.00313525			HYNIP00258CG0120	hairy/enhancer-of-split related with YRPW motif protein 1	gi|734611725|ref|XP_010733281.1|hairy/enhancer-of-split related with YRPW motif protein 1 [Larimichthys crocea]	1.2e-174	300	0.8592	Larimichthys crocea	HYNIP00258CG0120	-2.2416	1.56205	0.00133661	0.0423838
HYNIP00958CG0030	28 kDa heat- and acid-stable phosphoprotein	gi|1395247236|gb|AWP18601.1|putative 28 kDa heat- and acid-stable phosphoprotein [Scophthalmus maximus]	3.6e-74	150	0.8453	Scophthalmus maximus	HYNIP00958CG0030	2.31743	1.56931	0.000489486	0.0219196			HYNIP00752CG0050	WAS/WASL-interacting protein family member 3-like isoform X1	gi|1367494844|ref|XP_024231048.1|WAS/WASL-interacting protein family member 3-like [Oncorhynchus tshawytscha]	1.6e-40	140	0.6277	Oncorhynchus tshawytscha	HYNIP00752CG0050	-2.23389	1.80534	0.000148391	0.00972581
HYNIP00945CG0080	Uncharacterised protein	gi|1157388668|emb|SKG71265.1|Uncharacterised protein [Mycobacteroides abscessus subsp. bolletii]	7.8e-36	100	0.5098	Mycobacteroides abscessus subsp. bolletii	HYNIP00945CG0080	2.29155	9.41042	3.49e-07	0.000133789			HYNIP00113CG0090	---NA---						HYNIP00113CG0090	-2.22614	1.18498	0.000135075	0.00907403
HYNIP00410CG0100	helicase ARIP4 isoform X1	gi|929228400|ref|XP_013990661.1|PREDICTED: helicase ARIP4-like isoform X1 [Salmo salar]	0	540	0.7781	Salmo salar	HYNIP00410CG0100	2.28881	2.41224	0.00109438	0.0382756			HYNIP00851CG0020	hypothetical protein DPX16_22646	gi|1515183406|gb|ROL45729.1|hypothetical protein DPX16_22646 [Anabarilius grahami]	1.4e-61	200	0.5	Anabarilius grahami	HYNIP00851CG0020	-2.20518	2.89748	1.09e-05	0.00143869
HYNIP00721CG0060	selenocysteine lyase	gi|291190492|ref|NP_001167277.1|selenocysteine lyase [Salmo salar]/gi|223648998|gb|ACN11257.1|Selenocysteine lyase [Salmo salar]	1.1e-70	120	0.8803	Salmo salar/Salmo salar	HYNIP00721CG0060	2.28608	4.96946	0.000347794	0.0177318			HYNIP00642CG0120	predicted protein	gi|156407344|ref|XP_001641504.1|predicted protein [Nematostella vectensis]/gi|156228643|gb|EDO49441.1|predicted protein [Nematostella vectensis]	1.5e-21	75	0.487	Nematostella vectensis/Nematostella vectensis	HYNIP00642CG0120	-2.20102	3.42154	4.81e-05	0.00389804
HYNIP00175CG0150	early growth response protein 2b-like	gi|929267558|ref|XP_014010376.1|PREDICTED: early growth response protein 2b-like isoform X1 [Salmo salar]	2e-160	290	0.7666	Salmo salar	HYNIP00175CG0150	2.27672	5.56653	1.62e-06	0.000377278			HYNIP00859CG0090	dual specificity protein phosphatase CDC14B isoform X2	gi|961850210|ref|XP_014889733.1|PREDICTED: dual specificity protein phosphatase CDC14B-like isoform X2 [Poecilia latipinna]	0	370	0.8961	Poecilia latipinna	HYNIP00859CG0090	-2.1729	2.25159	0.00116202	0.039918
HYNIP00327CG0080	interleukin-17 receptor A	gi|1529863382|ref|XP_010747889.3|interleukin-17 receptor A [Larimichthys crocea]/gi|1115233556|gb|APM87153.1|interleukin 17 receptor A [Larimichthys crocea]	5.8e-129	290	0.6751	Larimichthys crocea/Larimichthys crocea	HYNIP00327CG0080	2.26079	4.25219	0.000106265	0.00741318			HYNIP00439CG0060	band 4.1-like protein 5 isoform X1	gi|1110904160|ref|XP_019208420.1|band 4.1-like protein 5 isoform X1 [Oreochromis niloticus]	1.9e-60	200	0.5285	Oreochromis niloticus	HYNIP00439CG0060	-2.17263	1.71173	4.62e-05	0.00377559
HYNIP01460CG0030	U4/U6 small nuclear ribonucleoprotein Prp3 isoform X1	gi|1041113787|ref|XP_017280428.1|U4/U6 small nuclear ribonucleoprotein Prp3 [Kryptolebias marmoratus]	7.8e-84	170	0.7934	Kryptolebias marmoratus	HYNIP01460CG0030	2.25288	2.18254	0.000842343	0.0327863			HYNIP00141CG0150	MORC family CW-type zinc finger protein 3	gi|1342946770|ref|XP_023865148.1|MORC family CW-type zinc finger protein 3 isoform X2 [Salvelinus alpinus]	0	620	0.5367	Salvelinus alpinus	HYNIP00141CG0150	-2.15443	4.28256	0.000918558	0.0348553
HYNIP00497CG0060	B(0,+)-type amino acid transporter 1	gi|291190582|ref|NP_001167290.1|HLA-B associated transcript 1 [Salmo salar]/gi|223649068|gb|ACN11292.1|B0,+-type amino acid transporter 1 [Salmo salar]	0	460	0.9155	Salmo salar/Salmo salar	HYNIP00497CG0060	2.23477	3.01339	0.000424279	0.020467			HYNIP00917CG0020	complement factor H-like	gi|1129895784|ref|XP_019740144.1|PREDICTED: complement factor H-like [Hippocampus comes]	1.1e-49	130	0.6202	Hippocampus comes	HYNIP00917CG0020	-2.13917	4.45455	0.000219064	0.0130703
HYNIP00053CG0500	uncharacterized protein LOC110503580	gi|1211316517|ref|XP_021437659.1|uncharacterized protein LOC110503580 [Oncorhynchus mykiss]/gi|1211316519|ref|XP_021437660.1|uncharacterized protein LOC110503580 [Oncorhynchus mykiss]	1.5e-130	260	0.6094	Oncorhynchus mykiss/Oncorhynchus mykiss	HYNIP00053CG0500	2.22566	1.60277	0.00107967	0.0380994			HYNIP00563CG0120	tubulin-folding cofactor B	gi|1250165077|ref|XP_022623255.1|tubulin-folding cofactor B [Seriola dumerili]	5.8e-142	220	0.8364	Seriola dumerili	HYNIP00563CG0120	-2.13637	3.15802	0.000964058	0.0353969
HYNIP00363CG0140	ras-related protein Rab-27B-like	gi|1343017092|ref|XP_023858010.1|ras-related protein Rab-27B-like [Salvelinus alpinus]	9.2e-127	200	0.8909	Salvelinus alpinus	HYNIP00363CG0140	2.21668	0.906772	0.000498162	0.0221462			HYNIP00419CG0070	GTPase IMAP family member 4-like	gi|1211242320|ref|XP_021475158.1|GTPase IMAP family member 4-like [Oncorhynchus mykiss]	1.4e-05	45	0.5769	Oncorhynchus mykiss	HYNIP00419CG0070	-2.1358	3.93763	6.33e-05	0.00476374
HYNIP00013CG0190	mucosa-associated lymphoid tissue lymphoma translocation protein 1-like	gi|929255460|ref|XP_014004056.1|PREDICTED: mucosa-associated lymphoid tissue lymphoma translocation protein 1-like [Salmo salar]/gi|929255462|ref|XP_014004057.1|PREDICTED: mucosa-associated lymphoid tissue lymphoma translocation protein 1-like [Salmo salar]	0	440	0.8566	Salmo salar/Salmo salar	HYNIP00013CG0190	2.19021	3.66792	7.35e-07	0.000222266			HYNIP00474CG0010	guanine nucleotide-binding protein G(I)/G(S)/G(O) subunit gamma-7	gi|551530522|ref|XP_005816717.1|guanine nucleotide-binding protein G(I)/G(S)/G(O) subunit gamma-7 [Xiphophorus maculatus]/gi|617439625|ref|XP_007564613.1|PREDICTED: guanine nucleotide-binding protein G(I)/G(S)/G(O) subunit gamma-7 [Poecilia formosa]/gi|617439628|ref|XP_007564614.1|PREDICTED: guanine nucleotide-binding protein G(I)/G(S)/G(O) subunit gamma-7 [Poecilia formosa]/gi|658915452|ref|XP_0…	9e-43	68	1	Xiphophorus maculatus/Poecilia formosa/Poecilia formosa/Poecilia reticulata/Poecilia reticulata/Poecilia reticulata/Poecilia reticulata/Poecilia latipinna/Poecilia latipinna/Poecilia mexicana/Poecilia mexicana/Poecilia mexicana/Poecilia formosa/Xiphophorus maculatus/Xiphophorus maculatus/Xiphophorus maculatus/Xiphophorus couchianus/Xiphophorus couchianus/Xiphophorus couchianus/Xiphophorus couchia…	HYNIP00474CG0010	-2.12441	2.66659	0.000296051	0.0157934
HYNIP01114CG0010	SH3 and multiple ankyrin repeat domains protein 3 isoform X1	gi|930750238|ref|XP_014192891.1|PREDICTED: SH3 and multiple ankyrin repeat domains protein 3 isoform X5 [Haplochromis burtoni]	0	850	0.8057	Haplochromis burtoni	HYNIP01114CG0010	2.18798	2.44771	4.25e-06	0.000695555			HYNIP00848CG0030	KAT8 regulatory NSL complex subunit 1-like isoform X1	gi|742191790|ref|XP_010890803.1|PREDICTED: KAT8 regulatory NSL complex subunit 1 isoform X1 [Esox lucius]/gi|742191794|ref|XP_010890804.1|PREDICTED: KAT8 regulatory NSL complex subunit 1 isoform X1 [Esox lucius]	3.7e-176	400	0.6342	Esox lucius/Esox lucius	HYNIP00848CG0030	-2.09634	2.55007	0.000215345	0.0130197
HYNIP00892CG0090	insulin-like growth factor-binding protein 1	gi|742106000|ref|XP_010870743.1|PREDICTED: insulin-like growth factor-binding protein 1 isoform X1 [Esox lucius]	7.4e-120	200	0.8072	Esox lucius	HYNIP00892CG0090	2.17885	6.25233	1.01e-06	0.000294172			HYNIP00371CG0080	melanoma receptor tyrosine-protein kinase-like isoform X2	gi|1338840533|ref|XP_023663224.1|epidermal growth factor receptor-like [Paramormyrops kingsleyae]	0	390	0.6724	Paramormyrops kingsleyae	HYNIP00371CG0080	-2.09034	2.22143	0.000372281	0.0184705
HYNIP00009CG0080	rab GTPase-activating protein 1-like	gi|1079788124|ref|XP_018519055.1|PREDICTED: rab GTPase-activating protein 1-like [Lates calcarifer]	2.6e-113	250	0.744	Lates calcarifer	HYNIP00009CG0080	2.17024	1.66477	0.00119669	0.0405201			HYNIP00095CG0280	myocyte-specific enhancer factor 2C-like isoform X1	gi|1211356159|ref|XP_021457767.1|myocyte-specific enhancer factor 2C-like [Oncorhynchus mykiss]	0	420	0.8698	Oncorhynchus mykiss	HYNIP00095CG0280	-2.07165	1.4586	0.00143453	0.0448394
HYNIP00664CG0080	alanyl-tRNA editing protein Aarsd1	gi|1317144969|ref|XP_023285065.1|alanyl-tRNA editing protein Aarsd1 [Seriola lalandi dorsalis]	7.2e-142	220	0.931	Seriola lalandi dorsalis	HYNIP00664CG0080	2.16268	3.35462	2.95e-05	0.00292278			HYNIP00125CG0020	utrophin isoform X2	gi|1079806115|ref|XP_018528127.1|PREDICTED: LOW QUALITY PROTEIN: dystrophin-like [Lates calcarifer]	0	880	0.7674	Lates calcarifer	HYNIP00125CG0020	-2.07046	1.82743	0.00122013	0.0411353
HYNIP00887CG0010	phospholipid phosphatase-related protein type 1 isoform X1	gi|929237347|ref|XP_013994510.1|PREDICTED: lipid phosphate phosphatase-related protein type 1 [Salmo salar]/gi|929237349|ref|XP_013994511.1|PREDICTED: lipid phosphate phosphatase-related protein type 1 [Salmo salar]	0	280	0.9559	Salmo salar/Salmo salar	HYNIP00887CG0010	2.16131	2.30957	0.000261247	0.0147045			HYNIP00202CG0010	tumor necrosis factor receptor superfamily member 10B-like isoform X4	gi|1211247068|ref|XP_021477664.1|tumor necrosis factor receptor superfamily member 10B-like isoform X4 [Oncorhynchus mykiss]	3.3e-153	290	0.707	Oncorhynchus mykiss	HYNIP00202CG0010	-2.05043	2.32457	1.97e-05	0.00220324
HYNIP00068CG0720	probable peptidyl-tRNA hydrolase	gi|929278458|ref|XP_014016055.1|PREDICTED: probable peptidyl-tRNA hydrolase isoform X2 [Salmo salar]	2.3e-126	200	0.8681	Salmo salar	HYNIP00068CG0720	2.16122	2.27734	8.93e-05	0.00637386			HYNIP00591CG0060	ATP-binding cassette sub-family A member 1-like	gi|884951017|ref|XP_012989040.1|PREDICTED: ATP-binding cassette sub-family A member 1 isoform X2 [Esox lucius]	0	660	0.9107	Esox lucius	HYNIP00591CG0060	-2.04109	3.70895	5.88e-05	0.00450373
HYNIP00319CG0140	prominin-1-A-like	gi|929054482|ref|XP_014054469.1|PREDICTED: prominin-1-A-like [Salmo salar]/gi|929054484|ref|XP_014054479.1|PREDICTED: prominin-1-A-like [Salmo salar]/gi|929054486|ref|XP_014054485.1|PREDICTED: prominin-1-A-like [Salmo salar]	2.2e-131	220	0.8043	Salmo salar/Salmo salar/Salmo salar	HYNIP00319CG0140	2.16042	2.82893	0.000484605	0.0219196			HYNIP00171CG0330	titin-like isoform X3	gi|1343918887|ref|XP_023819728.1|uncharacterized protein LOC101156915 isoform X16 [Oryzias latipes]	1.1e-78	160	0.713	Oryzias latipes	HYNIP00171CG0330	-2.03976	2.01651	0.000255237	0.0145107
HYNIP00682CG0190	chloride anion exchanger-like	gi|1343045804|ref|XP_023825119.1|chloride anion exchanger, partial [Salvelinus alpinus]	0	620	0.8245	Salvelinus alpinus	HYNIP00682CG0190	2.10704	3.36491	1.03e-05	0.00137629			HYNIP00611CG0060	band 3 anion exchange protein-like	gi|1317110329|ref|XP_023266737.1|band 3 anion exchange protein-like [Seriola lalandi dorsalis]/gi|1317110331|ref|XP_023266738.1|band 3 anion exchange protein-like [Seriola lalandi dorsalis]	0	820	0.8914	Seriola lalandi dorsalis/Seriola lalandi dorsalis	HYNIP00611CG0060	-1.99945	5.71424	0.000490647	0.0219196
HYNIP00664CG0090	Glucose-6-phosphatase	gi|225707522|gb|ACO09607.1|Glucose-6-phosphatase [Osmerus mordax]	0	350	0.9831	Osmerus mordax	HYNIP00664CG0090	2.10282	10.2022	7.57e-06	0.00109043			HYNIP00234CG0170	testis-expressed sequence 2 protein-like isoform X1	gi|1168944277|ref|XP_020515450.1|testis-expressed protein 2-like isoform X1 [Labrus bergylta]	0	750	0.6994	Labrus bergylta	HYNIP00234CG0170	-1.97731	2.36196	0.000705913	0.0286415
HYNIP00117CG0490	phosphopantothenate--cysteine ligase	gi|1101607069|ref|XP_018967897.1|PREDICTED: phosphopantothenate--cysteine ligase [Cyprinus carpio]	4.6e-168	250	0.9055	Cyprinus carpio	HYNIP00117CG0490	2.10203	2.12666	0.00014076	0.0093864			HYNIP00488CG0090	kelch-like protein 35	gi|1343042321|ref|XP_023823242.1|kelch-like protein 35 [Salvelinus alpinus]	0	430	0.7683	Salvelinus alpinus	HYNIP00488CG0090	-1.97175	2.77993	0.000202569	0.0124976
HYNIP00004CG0360	sal-like protein 1	gi|1079794403|ref|XP_018522418.1|PREDICTED: sal-like protein 1 [Lates calcarifer]	0	1200	0.9197	Lates calcarifer	HYNIP00004CG0360	2.08901	6.62188	0.000105978	0.00741318			HYNIP00439CG0110	mitogen-activated protein kinase kinase kinase 19-like isoform X2	gi|929302922|ref|XP_014028936.1|PREDICTED: mitogen-activated protein kinase kinase kinase 19-like isoform X3 [Salmo salar]	0	770	0.6607	Salmo salar	HYNIP00439CG0110	-1.967	2.6254	0.000276219	0.015182
HYNIP00288CG0150	serine/threonine-protein kinase SIK2-like	gi|1367489875|ref|XP_024301608.1|serine/threonine-protein kinase SIK2-like [Oncorhynchus tshawytscha]	0	470	0.7106	Oncorhynchus tshawytscha	HYNIP00288CG0150	2.08169	5.99331	0.000438931	0.0207317			HYNIP00725CG0100	spectrin beta chain, erythrocytic-like isoform X1	gi|657538369|ref|XP_008275506.1|PREDICTED: spectrin beta chain, erythrocytic-like [Stegastes partitus]	0	340	0.9241	Stegastes partitus	HYNIP00725CG0100	-1.95877	3.54601	0.000243257	0.0141397
HYNIP00226CG0090	methyltransferase-like protein 9 isoform X1	gi|213515260|ref|NP_001133601.1|Methyltransferase-like protein 9 [Salmo salar]/gi|209154638|gb|ACI33551.1|Methyltransferase-like protein 9 precursor [Salmo salar]	0	290	0.8969	Salmo salar/Salmo salar	HYNIP00226CG0090	2.06224	3.29621	7.75e-06	0.00109822			HYNIP00480CG0070	tumor necrosis factor receptor superfamily member 21-like	gi|929247878|ref|XP_014000075.1|PREDICTED: tumor necrosis factor receptor superfamily member 21-like [Salmo salar]	0	480	0.7197	Salmo salar	HYNIP00480CG0070	-1.95049	3.20653	3.19e-05	0.00300527
HYNIP00695CG0020	up-regulator of cell proliferation-like	gi|1211229595|ref|XP_021451489.1|interferon-induced very large GTPase 1-like, partial [Oncorhynchus mykiss]	0	670	0.7478	Oncorhynchus mykiss	HYNIP00695CG0020	2.02192	1.76222	0.000867301	0.0334705			HYNIP00044CG0120	cysteine/serine-rich nuclear protein 1-like	gi|1250118048|ref|XP_022600067.1|cysteine/serine-rich nuclear protein 1-like isoform X1 [Seriola dumerili]	0	470	0.7671	Seriola dumerili	HYNIP00044CG0120	-1.93313	3.14747	0.00125315	0.04143
HYNIP00357CG0150	B-cell lymphoma 6 protein isoform X1	gi|1079800875|ref|XP_018525378.1|PREDICTED: LOW QUALITY PROTEIN: B-cell lymphoma 6 protein homolog [Lates calcarifer]	0	600	0.822	Lates calcarifer	HYNIP00357CG0150	1.97607	2.39837	0.000892017	0.0341338			HYNIP01080CG0020	probable ATP-dependent RNA helicase ddx6	gi|742197431|ref|XP_010892439.1|PREDICTED: probable ATP-dependent RNA helicase ddx6 [Esox lucius]/gi|1137539847|ref|XP_019896998.1|PREDICTED: probable ATP-dependent RNA helicase ddx6 [Esox lucius]/gi|1137539850|ref|XP_019897000.1|PREDICTED: probable ATP-dependent RNA helicase ddx6 [Esox lucius]	0	450	0.924	Esox lucius/Esox lucius/Esox lucius	HYNIP01080CG0020	-1.9083	3.28159	0.000681058	0.027948
HYNIP00220CG0120	insulin-induced gene 1 protein	gi|1199317293|ref|XP_021166600.1|insulin-induced gene 1 protein isoform X1 [Fundulus heteroclitus]	1.6e-103	150	0.9867	Fundulus heteroclitus	HYNIP00220CG0120	1.96833	7.15046	1.19e-05	0.00149607			HYNIP00102CG0250	uncharacterized protein LOC111967866 isoform X4	gi|1342986848|ref|XP_023849054.1|uncharacterized protein LOC111967866 isoform X4 [Salvelinus alpinus]	0	1300	0.6677	Salvelinus alpinus	HYNIP00102CG0250	-1.90524	1.82123	0.00123883	0.0413086
HYNIP00068CG0590	AN1-type zinc finger protein 5 isoform X1	gi|1549136733|gb|RVE68486.1|hypothetical protein OJAV_G00091830 [Oryzias javanicus]	2e-82	150	0.6398	Oryzias javanicus	HYNIP00068CG0590	1.96823	5.94637	6.6e-06	0.000997779			HYNIP00533CG0080	zinc finger protein 318-like	gi|1250110077|ref|XP_022595732.1|uncharacterized protein LOC111217953 [Seriola dumerili]/gi|1250110079|ref|XP_022595733.1|uncharacterized protein LOC111217953 [Seriola dumerili]/gi|1250110081|ref|XP_022595734.1|uncharacterized protein LOC111217953 [Seriola dumerili]	5.2e-28	170	0.4718	Seriola dumerili/Seriola dumerili/Seriola dumerili	HYNIP00533CG0080	-1.89012	3.64619	2.82e-05	0.0029069
HYNIP00005CG0610	adapter molecule crk	gi|1549132958|gb|RVE64715.1|hypothetical protein OJAV_G00128360 [Oryzias javanicus]	0	280	0.9019	Oryzias javanicus	HYNIP00005CG0610	1.94837	1.91557	0.00139108	0.043653			HYNIP00140CG0180	suppressor of cytokine signaling 6	gi|542193604|ref|XP_005471839.1|suppressor of cytokine signaling 6 [Oreochromis niloticus]	0	500	0.9367	Oreochromis niloticus	HYNIP00140CG0180	-1.86878	1.75973	0.00138322	0.0435571
HYNIP00005CG0120	Ubiquitin carboxyl-terminal hydrolase 32	gi|929284247|ref|XP_014019108.1|PREDICTED: ubiquitin carboxyl-terminal hydrolase 32-like isoform X3 [Salmo salar]	0	280	0.9622	Salmo salar	HYNIP00005CG0120	1.93559	5.48074	1.76e-06	0.000381629			HYNIP00047CG0240	kinesin-like protein KIF1A isoform X2	gi|1308441105|ref|XP_023141533.1|kinesin-like protein KIF1A isoform X2 [Amphiprion ocellaris]	0	1600	0.9573	Amphiprion ocellaris	HYNIP00047CG0240	-1.86414	4.51574	6.99e-05	0.00519596
HYNIP00424CG0060	transcription factor p65 isoform X2	gi|929269022|ref|XP_014011133.1|PREDICTED: transcription factor p65-like [Salmo salar]	0	470	0.7221	Salmo salar	HYNIP00424CG0060	1.93489	6.30748	2.54e-06	0.000490656			HYNIP00259CG0160	---NA---						HYNIP00259CG0160	-1.83487	2.6865	5.91e-05	0.00450373
HYNIP00785CG0040	deleted in malignant brain tumors 1 protein-like	gi|1137542892|ref|XP_019897801.1|PREDICTED: uromodulin [Esox lucius]	0	470	0.6105	Esox lucius	HYNIP00785CG0040	1.93099	4.45779	0.00088878	0.0341338			HYNIP00215CG0280	E3 ubiquitin-protein ligase RNF19A isoform X1	gi|1158844439|ref|XP_020330996.1|E3 ubiquitin-protein ligase RNF19A isoform X1 [Oncorhynchus kisutch]/gi|1158844441|ref|XP_020330997.1|E3 ubiquitin-protein ligase RNF19A isoform X2 [Oncorhynchus kisutch]/gi|1158844443|ref|XP_020330998.1|E3 ubiquitin-protein ligase RNF19A isoform X1 [Oncorhynchus kisutch]/gi|1158844445|ref|XP_020331000.1|E3 ubiquitin-protein ligase RNF19A isoform X1 [Oncorhynchus …	0	710	0.8367	Oncorhynchus kisutch/Oncorhynchus kisutch/Oncorhynchus kisutch/Oncorhynchus kisutch/Oncorhynchus kisutch/Oncorhynchus kisutch/Oncorhynchus kisutch/Oncorhynchus kisutch/Oncorhynchus kisutch/Oncorhynchus kisutch/Oncorhynchus kisutch/Oncorhynchus kisutch	HYNIP00215CG0280	-1.82387	2.28591	0.00147445	0.0457938
HYNIP00901CG0060	glutathione-specific gamma-glutamylcyclotransferase 1-like	gi|1342963561|ref|XP_023842013.1|glutathione-specific gamma-glutamylcyclotransferase 1 [Salvelinus alpinus]	5.8e-118	170	0.9355	Salvelinus alpinus	HYNIP00901CG0060	1.91624	3.32829	0.000944243	0.0352401			HYNIP00579CG0050	egl nine homolog 1 isoform X1	gi|1472966806|ref|XP_026210037.1|egl nine homolog 1 isoform X1 [Anabas testudineus]	0	310	0.8447	Anabas testudineus	HYNIP00579CG0050	-1.80573	5.09646	0.00119742	0.0405201
HYNIP00015CG0300	EH domain-containing protein 3	gi|1511174609|ref|XP_026878624.1|EH domain-containing protein 3 [Electrophorus electricus]	0	520	0.9522	Electrophorus electricus	HYNIP00015CG0300	1.88495	1.82434	0.00112184	0.038832			HYNIP00382CG0140	high affinity cAMP-specific and IBMX-insensitive 3',5'-cyclic phosphodiesterase 8A-like	gi|1317106222|ref|XP_023264542.1|high affinity cAMP-specific and IBMX-insensitive 3',5'-cyclic phosphodiesterase 8A-like isoform X2 [Seriola lalandi dorsalis]	0	250	0.9845	Seriola lalandi dorsalis	HYNIP00382CG0140	-1.80423	4.65443	0.000997512	0.0363311
HYNIP00171CG0270	complement C4-like	gi|185135626|ref|NP_001117857.1|complement component 4 precursor [Oncorhynchus mykiss]/gi|40217259|emb|CAD66666.1|complement C4 [Oncorhynchus mykiss]	0	1000	0.7012	Oncorhynchus mykiss/Oncorhynchus mykiss	HYNIP00171CG0270	1.88371	10.4199	0.00132861	0.0423838			HYNIP01127CG0040	asc-type amino acid transporter 1-like	gi|1564334031|gb|RXN30059.1|nuclear factor of activated T- cytoplasmic 3-like protein [Labeo rohita]	0	780	0.855	Labeo rohita	HYNIP01127CG0040	-1.76842	2.31939	0.000940663	0.0352401
HYNIP01869CG0020	E3 ubiquitin-protein ligase RNF126-like	gi|831556566|ref|XP_012730091.1|E3 ubiquitin-protein ligase RNF126-like isoform X2 [Fundulus heteroclitus]	0	290	0.9172	Fundulus heteroclitus	HYNIP01869CG0020	1.87165	3.41885	5.6e-05	0.00438154			HYNIP00570CG0050	beta-1,4-galactosyltransferase 2-like	gi|929072462|ref|XP_014046072.1|PREDICTED: beta-1,4-galactosyltransferase 2-like [Salmo salar]	0	320	0.9347	Salmo salar	HYNIP00570CG0050	-1.75973	3.49194	0.000287711	0.0155313
HYNIP00108CG0200	solute carrier family 25 member 43	gi|1342976318|ref|XP_023845667.1|solute carrier family 25 member 43 [Salvelinus alpinus]	2.6e-161	240	0.9331	Salvelinus alpinus	HYNIP00108CG0200	1.84938	1.90189	0.00100935	0.0366151			HYNIP00797CG0090	fibronectin-like isoform X1	gi|929262714|ref|XP_014007833.1|PREDICTED: fibronectin [Salmo salar]	0	1500	0.8502	Salmo salar	HYNIP00797CG0090	-1.72809	8.01475	0.00118155	0.0404357
HYNIP00130CG0480	transcription regulator protein BACH1-like	gi|1469992147|ref|XP_026183693.1|transcription regulator protein BACH1-like [Mastacembelus armatus]/gi|1469992149|ref|XP_026183694.1|transcription regulator protein BACH1-like [Mastacembelus armatus]	3.1e-175	440	0.5863	Mastacembelus armatus/Mastacembelus armatus	HYNIP00130CG0480	1.84746	3.18629	0.000691694	0.0282566			HYNIP00009CG0340	endoribonuclease Dicer	gi|1079767076|ref|XP_018553217.1|PREDICTED: LOW QUALITY PROTEIN: endoribonuclease Dicer [Lates calcarifer]	0	1600	0.8911	Lates calcarifer	HYNIP00009CG0340	-1.72194	3.12347	0.000154864	0.00996071
HYNIP00636CG0150	WD repeat and SOCS box-containing protein 2	gi|1395235962|gb|AWP07573.1|putative WD repeat and SOCS box-containing protein 2 [Scophthalmus maximus]	0	600	0.7484	Scophthalmus maximus	HYNIP00636CG0150	1.84162	3.73733	0.000348028	0.0177318			HYNIP00337CG0160	C-X-C chemokine receptor type 4-2	gi|1530843578|emb|VCX30975.1|unnamed protein product, partial [Gulo gulo]	6.8e-07	32	0.7273	Gulo gulo	HYNIP00337CG0160	-1.7167	3.22459	0.000331527	0.0170831
HYNIP00026CG0380	PDZ and LIM domain protein 1	gi|225706486|gb|ACO09089.1|PDZ and LIM domain protein 1 [Osmerus mordax]	1.9e-121	170	0.9942	Osmerus mordax	HYNIP00026CG0380	1.83013	3.97592	1.56e-05	0.0017947			HYNIP00640CG0150	dematin-like isoform X2	gi|1229025429|ref|XP_022077442.1|dematin-like [Acanthochromis polyacanthus]	7e-165	290	0.7416	Acanthochromis polyacanthus	HYNIP00640CG0150	-1.71012	3.21709	0.000441197	0.0207317
HYNIP00350CG0140	Serine/threonine-protein phosphatase 2A 55 kDa regulatory subunit B delta isoform	gi|1563836291|gb|RXM27107.1|Serine/threonine-protein phosphatase 2A 55 kDa regulatory subunit B delta isoform [Acipenser ruthenus]	0	320	0.9114	Acipenser ruthenus	HYNIP00350CG0140	1.82559	3.43405	0.000487889	0.0219196			HYNIP00048CG0200	hemoglobin embryonic subunit alpha-like	gi|225706038|gb|ACO08865.1|Hemoglobin subunit alpha-2 [Osmerus mordax]	1.8e-92	140	0.958	Osmerus mordax	HYNIP00048CG0200	-1.70928	10.2559	0.00070743	0.0286415
HYNIP01153CG0030	zinc finger protein 40 isoform X1	gi|929244010|ref|XP_013998059.1|PREDICTED: zinc finger protein 40-like isoform X1 [Salmo salar]	0	2000	0.7927	Salmo salar	HYNIP01153CG0030	1.82012	4.4601	0.000628787	0.0264003			HYNIP00647CG0050	---NA---						HYNIP00647CG0050	-1.70021	5.24664	0.000315053	0.0165157
HYNIP00282CG0010	Proprotein convertase subtilisin/kexin type 6	gi|1564347867|gb|RXN37723.1|pro convertase subtilisin kexin type 6 isoform X1 [Labeo rohita]	0	460	0.7352	Labeo rohita	HYNIP00282CG0010	1.81318	4.8154	1.35e-05	0.00160655			HYNIP00219CG0130	interferon regulatory factor 9	gi|1367390928|ref|XP_024257821.1|interferon regulatory factor 8-like [Oncorhynchus tshawytscha]/gi|1367493164|ref|XP_024230134.1|interferon regulatory factor 8-like [Oncorhynchus tshawytscha]	0	340	0.7958	Oncorhynchus tshawytscha/Oncorhynchus tshawytscha	HYNIP00219CG0130	-1.67081	4.36681	0.00143878	0.0448394
HYNIP00770CG0070	scaffold attachment factor B2-like	gi|1317099585|ref|XP_023261008.1|scaffold attachment factor B2-like [Seriola lalandi dorsalis]	3.4e-102	210	0.7778	Seriola lalandi dorsalis	HYNIP00770CG0070	1.79698	3.58809	0.000386186	0.0189315			HYNIP01290CG0070	calnexin-like isoform X1	gi|1137493514|ref|XP_019901712.1|PREDICTED: calnexin [Esox lucius]	0	280	0.969	Esox lucius	HYNIP01290CG0070	-1.66924	3.50626	0.000428997	0.0205346
HYNIP00210CG0270	---NA---						HYNIP00210CG0270	1.77527	3.55754	4.5e-05	0.0037106			HYNIP01270CG0030	serine/threonine-protein kinase WNK4-like	gi|1211258364|ref|XP_021413632.1|serine/threonine-protein kinase WNK4-like [Oncorhynchus mykiss]	3.4e-146	470	0.6057	Oncorhynchus mykiss	HYNIP01270CG0030	-1.66561	3.51253	0.000591505	0.0254235
HYNIP00258CG0050	transmembrane protein 64	gi|1228987309|ref|XP_022058005.1|transmembrane protein 64 [Acanthochromis polyacanthus]/gi|1228987311|ref|XP_022058006.1|transmembrane protein 64 [Acanthochromis polyacanthus]	0	330	0.9403	Acanthochromis polyacanthus/Acanthochromis polyacanthus	HYNIP00258CG0050	1.76598	4.29301	0.000187395	0.011802			HYNIP00031CG0290	N-terminal kinase-like protein isoform X2	gi|1342983359|ref|XP_023847936.1|N-terminal kinase-like protein isoform X5 [Salvelinus alpinus]	0	790	0.9017	Salvelinus alpinus	HYNIP00031CG0290	-1.65671	4.07617	0.000287427	0.0155313
HYNIP00269CG0160	segment polarity protein dishevelled homolog DVL-2	gi|1515183240|gb|ROL45577.1|Very long-chain specific acyl-CoA dehydrogenase, mitochondrial [Anabarilius grahami]	0	1300	0.857	Anabarilius grahami	HYNIP00269CG0160	1.76526	3.36527	8.36e-05	0.00606401			HYNIP00196CG0140	RNA-binding protein 38-like	gi|742149018|ref|XP_010880155.1|PREDICTED: RNA-binding protein 38 isoform X2 [Esox lucius]	1.2e-86	150	0.903	Esox lucius	HYNIP00196CG0140	-1.62415	4.67326	0.000115394	0.007929
HYNIP00334CG0050	N-acetylneuraminate 9-O-acetyltransferase	gi|1108935683|ref|XP_019118196.1|N-acetylneuraminate 9-O-acetyltransferase [Larimichthys crocea]	2.3e-163	250	0.95	Larimichthys crocea	HYNIP00334CG0050	1.75817	4.41201	2.92e-05	0.00292278			HYNIP01543CG0050	phosphatidylinositol N-acetylglucosaminyltransferase subunit C	gi|928080183|ref|XP_013890195.1|PREDICTED: phosphatidylinositol N-acetylglucosaminyltransferase subunit C-like [Austrofundulus limnaeus]	0	420	0.8245	Austrofundulus limnaeus	HYNIP01543CG0050	-1.55071	3.33444	0.00110048	0.0382756
HYNIP01585CG0020	Iron-regulated protein FrpC	gi|1049287982|ref|XP_017540598.1|PREDICTED: uncharacterized protein LOC108412876 [Pygocentrus nattereri]	0	1200	0.8275	Pygocentrus nattereri	HYNIP01585CG0020	1.70837	3.76641	0.00124214	0.0413086			HYNIP00181CG0380	U5 small nuclear ribonucleoprotein 200 kDa helicase	gi|1158860883|ref|XP_020326846.1|U5 small nuclear ribonucleoprotein 200 kDa helicase [Oncorhynchus kisutch]/gi|1211368903|ref|XP_021461563.1|U5 small nuclear ribonucleoprotein 200 kDa helicase [Oncorhynchus mykiss]/gi|1367436073|ref|XP_024273224.1|U5 small nuclear ribonucleoprotein 200 kDa helicase [Oncorhynchus tshawytscha]/gi|642132118|emb|CDQ56745.1|unnamed protein product [Oncorhynchus mykiss]	0	1000	0.9664	Oncorhynchus kisutch/Oncorhynchus mykiss/Oncorhynchus tshawytscha/Oncorhynchus mykiss	HYNIP00181CG0380	-1.54393	4.47542	0.000374746	0.0184705
HYNIP00013CG0380	proprotein convertase subtilisin/kexin type 5-like isoform X1	gi|1317132053|ref|XP_023278201.1|proprotein convertase subtilisin/kexin type 5-like isoform X2 [Seriola lalandi dorsalis]	0	600	0.7989	Seriola lalandi dorsalis	HYNIP00013CG0380	1.69738	3.03192	0.000329843	0.0170831			HYNIP00047CG0130	glomulin	gi|1343029951|ref|XP_023864890.1|glomulin isoform X2 [Salvelinus alpinus]	0	550	0.9228	Salvelinus alpinus	HYNIP00047CG0130	-1.53695	2.68268	0.000811051	0.0321197
HYNIP00149CG0090	Na(+)/H(+) exchange regulatory cofactor NHE-RF3-like isoform X1	gi|1079756525|ref|XP_018548095.1|PREDICTED: Na(+)/H(+) exchange regulatory cofactor NHE-RF3-like isoform X3 [Lates calcarifer]	0	360	0.773	Lates calcarifer	HYNIP00149CG0090	1.6907	2.98791	0.00126938	0.0415595			HYNIP00070CG0210	---NA---						HYNIP00070CG0210	-1.52221	3.34841	0.000648359	0.0269723
HYNIP00292CG0080	teneurin-1-like	gi|1079724143|ref|XP_018530956.1|PREDICTED: LOW QUALITY PROTEIN: teneurin-1-like [Lates calcarifer]	0	460	0.8582	Lates calcarifer	HYNIP00292CG0080	1.6777	3.83647	0.000157674	0.01007			HYNIP00441CG0140	tubulin beta-1 chain-like	gi|1370633504|gb|PSN42441.1|Tubulin beta-1 chain [Blattella germanica]	5.5e-108	180	0.8079	Blattella germanica	HYNIP00441CG0140	-1.52141	8.42939	0.000294445	0.0157934
HYNIP00698CG0060	ephexin-1	gi|1343041062|ref|XP_023822580.1|ephexin-1 isoform X1 [Salvelinus alpinus]/gi|1343041064|ref|XP_023822581.1|ephexin-1 isoform X1 [Salvelinus alpinus]/gi|1343041066|ref|XP_023822582.1|ephexin-1 isoform X1 [Salvelinus alpinus]	0	640	0.7355	Salvelinus alpinus/Salvelinus alpinus/Salvelinus alpinus	HYNIP00698CG0060	1.63415	3.06098	0.00101487	0.0366687			HYNIP00392CG0260	glyceraldehyde-3-phosphate dehydrogenase	gi|73665960|gb|AAZ79666.1|glyceraldehyde-3-phosphate dehydrogenase [Osmerus mordax]/gi|225707124|gb|ACO09408.1|Glyceraldehyde-3-phosphate dehydrogenase [Osmerus mordax]	1.5e-113	160	1	Osmerus mordax/Osmerus mordax	HYNIP00392CG0260	-1.52059	10.0596	0.000633793	0.0264879
HYNIP01317CG0040	hypothetical protein BpHYR1_054642	gi|1508651489|gb|RNA17545.1|hypothetical protein BpHYR1_054642 [Brachionus plicatilis]	3.5e-09	46	0.6053	Brachionus plicatilis	HYNIP01317CG0040	1.62516	2.40236	0.00107621	0.0380994			HYNIP00263CG0130	probable global transcription activator SNF2L2 isoform X1	gi|1338760191|ref|XP_023676416.1|probable global transcription activator SNF2L2 [Paramormyrops kingsleyae]	0	1000	0.8553	Paramormyrops kingsleyae	HYNIP00263CG0130	-1.50507	3.21978	0.000860213	0.0333388
HYNIP00118CG0090	dynamin-like 120 kDa protein, mitochondrial isoform X1	gi|1207177933|ref|XP_021332525.1|dynamin-like 120 kDa protein, mitochondrial isoform X6 [Danio rerio]	0	320	0.9845	Danio rerio	HYNIP00118CG0090	1.60175	2.87879	0.000818348	0.0321281			HYNIP00138CG0350	tyrosine-protein kinase JAK2-like	gi|929236830|ref|XP_013994249.1|PREDICTED: tyrosine-protein kinase JAK2-like isoform X3 [Salmo salar]	0	930	0.823	Salmo salar	HYNIP00138CG0350	-1.48203	4.76888	0.00133505	0.0423838
HYNIP00074CG0240	cell death regulator Aven	gi|1020493975|ref|XP_016085518.1|PREDICTED: cell death regulator Aven-like [Sinocyclocheilus grahami]	4.5e-86	220	0.5973	Sinocyclocheilus grahami	HYNIP00074CG0240	1.58573	2.7393	0.000759232	0.0304667			HYNIP00939CG0100	calpain-3 isoform X2	gi|1143429034|ref|XP_019968936.1|PREDICTED: calpain-3-like isoform X1 [Paralichthys olivaceus]	5.2e-76	120	0.9274	Paralichthys olivaceus	HYNIP00939CG0100	-1.47568	4.34759	0.000269475	0.0149931
HYNIP00093CG0220	E3 ubiquitin-protein ligase MSL2-like	gi|1529962120|ref|XP_027129911.1|E3 ubiquitin-protein ligase MSL2 [Larimichthys crocea]	0	500	0.8344	Larimichthys crocea	HYNIP00093CG0220	1.54974	3.84432	0.000255656	0.0145107			HYNIP00751CG0090	acetylserotonin O-methyltransferase	gi|1211342164|ref|XP_021453293.1|acetylserotonin O-methyltransferase [Oncorhynchus mykiss]	2.4e-164	270	0.7584	Oncorhynchus mykiss	HYNIP00751CG0090	-1.4385	3.00444	0.00115754	0.0399154
HYNIP00594CG0080	peroxisomal trans-2-enoyl-CoA reductase	gi|746816240|ref|NP_001291052.1|peroxisomal trans-2-enoyl-CoA reductase [Esox lucius]/gi|225716102|gb|ACO13897.1|Peroxisomal trans-2-enoyl-CoA reductase [Esox lucius]	2e-132	200	0.9575	Esox lucius/Esox lucius	HYNIP00594CG0080	1.54151	2.75669	0.000939181	0.0352401			HYNIP00288CG0130	cystathionine beta-synthase-like	gi|1308449646|ref|XP_023142522.1|cystathionine beta-synthase-like [Amphiprion ocellaris]	0	530	0.8331	Amphiprion ocellaris	HYNIP00288CG0130	-1.35338	8.13233	0.000774476	0.0309415
HYNIP00047CG0220	serine/threonine-protein kinase 25	gi|1158940620|ref|XP_020318704.1|serine/threonine-protein kinase 25 [Oncorhynchus kisutch]/gi|1367526447|ref|XP_024247725.1|serine/threonine-protein kinase 25 isoform X2 [Oncorhynchus tshawytscha]	0	360	0.8463	Oncorhynchus kisutch/Oncorhynchus tshawytscha	HYNIP00047CG0220	1.50545	3.84634	0.00151699	0.0467946			HYNIP00020CG0070	RUN and FYVE domain-containing protein 1	gi|1469996197|ref|XP_026185893.1|RUN and FYVE domain-containing protein 1 [Mastacembelus armatus]	0	630	0.855	Mastacembelus armatus	HYNIP00020CG0070	-1.32114	4.14527	0.000619574	0.0262055
HYNIP00529CG0030	conserved oligomeric Golgi complex subunit 7	gi|1211274067|ref|XP_021420912.1|conserved oligomeric Golgi complex subunit 7-like isoform X1 [Oncorhynchus mykiss]/gi|1211274069|ref|XP_021420913.1|conserved oligomeric Golgi complex subunit 7-like isoform X2 [Oncorhynchus mykiss]/gi|642118637|emb|CDQ66102.1|unnamed protein product [Oncorhynchus mykiss]	0	720	0.9159	Oncorhynchus mykiss/Oncorhynchus mykiss/Oncorhynchus mykiss	HYNIP00529CG0030	1.4544	7.68746	0.00157186	0.0481594			HYNIP00499CG0020	DNA helicase B	gi|1139891046|gb|ONI48368.1|hypothetical protein AN643_01770 [Epulopiscium sp. SCG-B10WGA-EpuloB]	2.5e-10	45	0.6338	Epulopiscium sp. SCG-B10WGA-EpuloB	HYNIP00499CG0020	-1.2928	4.07219	0.00118852	0.0405201
HYNIP00002CG0660	FERM domain-containing protein 4B-like	gi|1308384839|ref|XP_023122354.1|FERM domain-containing protein 4B isoform X3 [Amphiprion ocellaris]	0	690	0.8423	Amphiprion ocellaris	HYNIP00002CG0660	1.44503	5.60299	0.000935991	0.0352401			HYNIP00945CG0030	inter-alpha-trypsin inhibitor heavy chain H3-like isoform X1	gi|1211280565|ref|XP_021424382.1|inter-alpha-trypsin inhibitor heavy chain H3-like isoform X3 [Oncorhynchus mykiss]	0	510	0.6905	Oncorhynchus mykiss	HYNIP00945CG0030	-1.28839	7.58534	0.00128044	0.0417708
HYNIP00026CG0530	DNA-directed RNA polymerase I subunit RPA2	gi|929266295|ref|XP_014009709.1|PREDICTED: DNA-directed RNA polymerase I subunit RPA2 [Salmo salar]	0	540	0.9765	Salmo salar	HYNIP00026CG0530	1.43915	3.17402	0.00123828	0.0413086
HYNIP00131CG0350	peptidyl-prolyl cis-trans isomerase FKBP5-like	gi|1168928465|ref|XP_020507498.1|peptidyl-prolyl cis-trans isomerase FKBP5-like [Labrus bergylta]/gi|1168928467|ref|XP_020507499.1|peptidyl-prolyl cis-trans isomerase FKBP5-like [Labrus bergylta]/gi|1168928469|ref|XP_020507500.1|peptidyl-prolyl cis-trans isomerase FKBP5-like [Labrus bergylta]	0	390	0.8678	Labrus bergylta/Labrus bergylta/Labrus bergylta	HYNIP00131CG0350	1.43245	8.69884	0.000487624	0.0219196
HYNIP00002CG0840	zinc fingers and homeoboxes protein 3-like isoform X1	gi|642099083|emb|CDQ77710.1|unnamed protein product [Oncorhynchus mykiss]	0	540	0.67	Oncorhynchus mykiss	HYNIP00002CG0840	1.41601	4.30812	0.00101905	0.0366735
HYNIP00105CG0360	arylsulfatase G	gi|1348557561|ref|XP_024001944.1|arylsulfatase G isoform X2 [Salvelinus alpinus]	0	400	0.8879	Salvelinus alpinus	HYNIP00105CG0360	1.41113	6.20748	0.000313843	0.0165157
HYNIP00119CG0210	cyclic AMP-responsive element-binding protein 3-like protein 3-B	gi|1367524801|ref|XP_024246846.1|cyclic AMP-responsive element-binding protein 3-like protein 3-B [Oncorhynchus tshawytscha]/gi|1367524833|ref|XP_024246861.1|cyclic AMP-responsive element-binding protein 3-like protein 3-B [Oncorhynchus tshawytscha]	3.8e-79	170	0.6786	Oncorhynchus tshawytscha/Oncorhynchus tshawytscha	HYNIP00119CG0210	1.39523	4.18508	0.000976744	0.0357181
HYNIP00455CG0180	Niemann-Pick C1-like protein 1	gi|1469980477|ref|XP_026177476.1|NPC1-like intracellular cholesterol transporter 1 [Mastacembelus armatus]	0	330	0.8757	Mastacembelus armatus	HYNIP00455CG0180	1.34639	4.3528	0.000541413	0.0237202
HYNIP00664CG0110	transmembrane protein 106B-like	gi|742095786|ref|XP_010864829.1|PREDICTED: transmembrane protein 106A [Esox lucius]	1.1e-45	92	0.7931	Esox lucius	HYNIP00664CG0110	1.3249	4.42622	0.00129533	0.0421051
HYNIP00106CG0050	long-chain-fatty-acid--CoA ligase 3-like	gi|1564326019|gb|RXN22963.1|long-chain-fatty-acid-- ligase 3-like protein [Labeo rohita]	2.7e-179	260	0.8689	Labeo rohita	HYNIP00106CG0050	1.31405	4.55472	0.00162918	0.0497476
HYNIP00105CG0340	archaemetzincin-2 isoform X1	gi|1564306537|gb|RXN04660.1|archaemetzincin-2 isoform X1 [Labeo rohita]/gi|1564313669|gb|RXN11191.1|archaemetzincin-2 isoform X1 [Labeo rohita]	2.3e-79	140	0.8662	Labeo rohita/Labeo rohita	HYNIP00105CG0340	1.30953	5.35875	0.000678035	0.027948
HYNIP01681CG0030	MAP7 domain-containing protein 1-like isoform X1	gi|742163371|ref|XP_010883682.1|PREDICTED: MAP7 domain-containing protein 1 isoform X5 [Esox lucius]	1.3e-60	130	0.7444	Esox lucius	HYNIP01681CG0030	1.241	4.231	0.00109122	0.0382756
HYNIP00159CG0240	epidermal growth factor receptor kinase substrate 8 isoform X1	gi|1143422443|ref|XP_019965318.1|PREDICTED: epidermal growth factor receptor kinase substrate 8-like isoform X1 [Paralichthys olivaceus]	3.5e-79	120	0.8986	Paralichthys olivaceus	HYNIP00159CG0240	1.24038	4.73225	0.000911163	0.0347199

## Sheet: Female_Muscle
Muscle_Female_Up														Muscle_Female_Down
Sequence Name	Sequence Description	Blast Top-Hit Description (HSP)	Blast Top-Hit E-Value	Blast Top-Hit Positives	Blast Top-Hit Similarity	Blast Hit Taxonomy Name	Muscle_Female_Up	logFC	logCPM	PValue	FDR			Sequence Name	Sequence Description	Blast Top-Hit Description (HSP)	Blast Top-Hit E-Value	Blast Top-Hit Positives	Blast Top-Hit Similarity	Blast Hit Taxonomy Name	Muscle_Female_Down	logFC	logCPM	PValue	FDR
HYNIP00021CG0090	myosin heavy chain, skeletal muscle, adult-like	gi|525017152|ref|XP_005056134.1|PREDICTED: myosin heavy chain, skeletal muscle-like [Ficedula albicollis]	0	1000	0.7039	Ficedula albicollis	HYNIP00021CG0090	6.8301	7.91892	4.16e-05	0.00464045			HYNIP00021CG0040	myosin heavy chain, skeletal muscle-like	gi|305632844|ref|NP_001182222.1|myosin-1 [Macaca mulatta]	0	840	0.8015	Macaca mulatta	HYNIP00021CG0040	-6.36866	7.66105	3.68e-05	0.00424308
HYNIP00610CG0230	L-serine dehydratase/L-threonine deaminase-like	gi|1158861084|ref|XP_020327588.1|L-serine dehydratase/L-threonine deaminase-like [Oncorhynchus kisutch]/gi|1158861086|ref|XP_020327595.1|L-serine dehydratase/L-threonine deaminase-like [Oncorhynchus kisutch]	0	310	0.9562	Oncorhynchus kisutch/Oncorhynchus kisutch	HYNIP00610CG0230	4.24259	7.6715	3.67e-08	1.46e-05			HYNIP00280CG0010	Peptidyl-prolyl cis-trans isomerase B	gi|483516000|gb|EOB03039.1|Peptidyl-prolyl cis-trans isomerase B, partial [Anas platyrhynchos]	9.5e-76	120	0.9179	Anas platyrhynchos	HYNIP00280CG0010	-5.99559	3.64989	7.53e-10	4.71e-07
HYNIP00960CG0010	nuclear receptor subfamily 4 group A member 3 isoform X2	gi|974049518|ref|XP_015255728.1|PREDICTED: nuclear receptor subfamily 4 group A member 3 isoform X4 [Cyprinodon variegatus]	1.4e-147	230	0.9587	Cyprinodon variegatus	HYNIP00960CG0010	4.02862	4.27224	2.31e-17	3.03e-13			HYNIP00468CG0030	nostrin isoform X2	gi|1079741779|ref|XP_018540254.1|PREDICTED: nostrin isoform X2 [Lates calcarifer]	3.1e-128	270	0.6059	Lates calcarifer	HYNIP00468CG0030	-4.52234	1.98657	4.44e-08	1.67e-05
HYNIP00068CG0450	---NA---						HYNIP00068CG0450	3.98534	2.13367	1.7e-06	0.0003802			HYNIP00212CG0070	probable ATP-dependent RNA helicase DHX58	gi|1250109247|ref|XP_022595269.1|probable ATP-dependent RNA helicase DHX58 [Seriola dumerili]	0	570	0.8426	Seriola dumerili	HYNIP00212CG0070	-4.18362	5.7575	7.1e-05	0.0069658
HYNIP00146CG0100	collagen alpha-1(IX) chain-like	gi|1389935107|ref|XP_024908532.1|uncharacterized protein K02A2.6-like [Cynoglossus semilaevis]/gi|1389935109|ref|XP_024908533.1|uncharacterized protein K02A2.6-like [Cynoglossus semilaevis]	0	710	0.8392	Cynoglossus semilaevis/Cynoglossus semilaevis	HYNIP00146CG0100	3.93271	6.85613	0.000311178	0.0195774			HYNIP00009CG0050	interferon alpha-inducible protein 27-like protein 2A	gi|1564312945|gb|RXN10515.1|interferon alpha-inducible 27 2A [Labeo rohita]	3.5e-27	89	0.7236	Labeo rohita	HYNIP00009CG0050	-4.03976	3.86267	0.000575368	0.0295376
HYNIP00232CG0100	Krueppel-like factor 10	gi|929091984|ref|XP_014056749.1|PREDICTED: Krueppel-like factor 10 [Salmo salar]	8e-129	280	0.6475	Salmo salar	HYNIP00232CG0100	3.80358	6.57137	1.41e-11	1.55e-08			HYNIP00223CG0160	transcription factor AP-2-epsilon isoform X1	gi|1079781263|ref|XP_018560719.1|PREDICTED: transcription factor AP-2-epsilon isoform X1 [Lates calcarifer]	0	420	0.9675	Lates calcarifer	HYNIP00223CG0160	-3.87339	2.20166	1.07e-05	0.0015781
HYNIP01184CG0020	dual specificity tyrosine-phosphorylation-regulated kinase 4-like isoform X1	gi|929254286|ref|XP_014003448.1|PREDICTED: dual specificity tyrosine-phosphorylation-regulated kinase 4-like isoform X1 [Salmo salar]	0	530	0.8983	Salmo salar	HYNIP01184CG0020	3.6962	1.49053	1.45e-05	0.00201359			HYNIP00039CG0700	interferon regulatory factor 4-like	gi|971454732|emb|CDM74110.1|IRF10 isoform-a [Oncorhynchus mykiss]	2.9e-162	280	0.6699	Oncorhynchus mykiss	HYNIP00039CG0700	-3.64122	2.3751	0.000844279	0.0388162
HYNIP01493CG0040	nuclear receptor subfamily 4 group A member 3 isoform X1	gi|1317091201|ref|XP_023256582.1|nuclear receptor subfamily 4 group A member 3 isoform X1 [Seriola lalandi dorsalis]	0	420	0.8363	Seriola lalandi dorsalis	HYNIP01493CG0040	3.48491	3.39181	1.14e-11	1.5e-08			HYNIP00237CG0180	signal transducer and activator of transcription 1-alpha/beta-like isoform X2	gi|929257995|ref|XP_014005373.1|PREDICTED: signal transducer and activator of transcription 1 alpha isoform X3 [Salmo salar]	0	460	0.8526	Salmo salar	HYNIP00237CG0180	-3.43479	6.02409	5.31e-07	0.000145569
HYNIP00138CG0200	Krueppel-like factor 4	gi|929058458|ref|XP_013980715.1|PREDICTED: Krueppel-like factor 4 isoform X1 [Salmo salar]/gi|929058460|ref|XP_013980722.1|PREDICTED: Krueppel-like factor 4 isoform X2 [Salmo salar]	1.7e-148	300	0.6778	Salmo salar/Salmo salar	HYNIP00138CG0200	3.33058	7.44774	9.09e-14	2.99e-10			HYNIP00038CG0190	predicted protein	gi|1321552970|gb|PLW37086.1|hypothetical protein PCASD_21584 [Puccinia coronata var. avenae f. sp. avenae]	1.7e-27	60	0.5128	Puccinia coronata var. avenae f. sp. avenae	HYNIP00038CG0190	-3.31699	0.723864	0.000183335	0.0135431
HYNIP00346CG0030	rho GTPase-activating protein 20-like isoform X2	gi|929083557|ref|XP_014052305.1|PREDICTED: rho GTPase-activating protein 20-like [Salmo salar]	0	770	0.7026	Salmo salar	HYNIP00346CG0030	3.10017	3.3457	9.63e-12	1.41e-08			HYNIP00553CG0060	alpha-1-antitrypsin-like isoform X13	gi|336478349|emb|CCA65526.1|alpha-1-antitrypsin-like [Plecoglossus altivelis]	0	340	0.9125	Plecoglossus altivelis	HYNIP00553CG0060	-3.31281	3.35922	0.000180096	0.013379
HYNIP00646CG0060	two pore calcium channel protein 2 isoform X1	gi|1343016280|ref|XP_023857570.1|two pore calcium channel protein 2 isoform X1 [Salvelinus alpinus]/gi|1343016282|ref|XP_023857571.1|two pore calcium channel protein 2 isoform X2 [Salvelinus alpinus]	0	640	0.794	Salvelinus alpinus/Salvelinus alpinus	HYNIP00646CG0060	3.04127	4.77239	3.5e-12	6.57e-09			HYNIP00336CG0030	neuronal PAS domain-containing protein 4-like	gi|736250214|ref|XP_010787785.1|PREDICTED: neuronal PAS domain-containing protein 4-like isoform X1 [Notothenia coriiceps]	0	490	0.656	Notothenia coriiceps	HYNIP00336CG0030	-3.27179	3.24348	3.32e-08	1.36e-05
HYNIP00234CG0070	voltage-dependent calcium channel gamma-4 subunit	gi|1079790669|ref|XP_018520411.1|PREDICTED: voltage-dependent calcium channel gamma-4 subunit [Lates calcarifer]	2e-162	270	0.8242	Lates calcarifer	HYNIP00234CG0070	2.99078	1.31302	6.85e-06	0.00111249			HYNIP00228CG0030	NFX1-type zinc finger-containing protein 1	gi|1158871406|ref|XP_020339540.1|NFX1-type zinc finger-containing protein 1 [Oncorhynchus kisutch]	0	1400	0.7809	Oncorhynchus kisutch	HYNIP00228CG0030	-3.11826	5.51723	0.000105069	0.0088561
HYNIP00067CG0090	protein phosphatase 1 regulatory subunit 3F isoform X2	gi|1079722390|ref|XP_018530024.1|PREDICTED: protein phosphatase 1 regulatory subunit 3F isoform X2 [Lates calcarifer]	1.6e-141	260	0.7697	Lates calcarifer	HYNIP00067CG0090	2.96787	5.53147	1.64e-11	1.66e-08			HYNIP00379CG0020	glutamate decarboxylase 1 isoform X1	gi|1367520794|ref|XP_024244739.1|glutamate decarboxylase 1-like isoform X3 [Oncorhynchus tshawytscha]	0	560	0.9359	Oncorhynchus tshawytscha	HYNIP00379CG0020	-3.02636	2.2404	1.84e-08	8.34e-06
HYNIP00047CG0590	transcription factor AP-1	gi|929073894|ref|XP_014047204.1|PREDICTED: transcription factor AP-1 [Salmo salar]/gi|209154508|gb|ACI33486.1|Transcription factor AP-1 [Salmo salar]	2.5e-140	210	0.9064	Salmo salar/Salmo salar	HYNIP00047CG0590	2.96261	7.85693	6.14e-10	4.04e-07			HYNIP00009CG0410	CD109 antigen-like	gi|1211293702|ref|XP_021430296.1|CD109 antigen-like [Oncorhynchus mykiss]	2.6e-86	190	0.6644	Oncorhynchus mykiss	HYNIP00009CG0410	-2.98566	-0.101313	6.3e-05	0.00636937
HYNIP00149CG0250	PREDICTED: uncharacterized protein CXorf21 homolog	gi|929083611|ref|XP_014052335.1|PREDICTED: uncharacterized protein CXorf21 homolog [Salmo salar]	2.5e-87	180	0.6842	Salmo salar	HYNIP00149CG0250	2.94759	5.05736	8.81e-12	1.41e-08			HYNIP00336CG0100	hyaluronan-binding protein 2	gi|742098061|ref|XP_010868378.1|PREDICTED: hyaluronan-binding protein 2 [Esox lucius]	2.6e-112	230	0.6313	Esox lucius	HYNIP00336CG0100	-2.94872	1.95122	0.000401724	0.0227684
HYNIP00083CG0060	GTP-binding protein 2	gi|742098304|ref|XP_010868446.1|PREDICTED: GTP-binding protein 2 [Esox lucius]	0	530	0.9434	Esox lucius	HYNIP00083CG0060	2.92416	7.97493	1.2e-08	5.64e-06			HYNIP00098CG0330	liprin-alpha-4 isoform X2	gi|657599299|ref|XP_008304456.1|PREDICTED: liprin-alpha-4 [Stegastes partitus]	0	280	0.8878	Stegastes partitus	HYNIP00098CG0330	-2.90098	2.14285	2.06e-06	0.000436341
HYNIP00016CG0410	jun dimerization protein 2-like	gi|1529883939|ref|XP_027140007.1|jun dimerization protein 2 [Larimichthys crocea]	1.8e-85	150	0.8138	Larimichthys crocea	HYNIP00016CG0410	2.89735	5.7642	8.07e-15	5.31e-11			HYNIP00141CG0170	vang-like protein 1	gi|1552368446|ref|XP_027561171.1|vang-like protein 2 [Neopelma chrysocephalum]	2.8e-137	310	0.7352	Neopelma chrysocephalum	HYNIP00141CG0170	-2.8351	7.62251	0.00058316	0.0295376
HYNIP00024CG0470	calcium-independent phospholipase A2-gamma-like	gi|1343022192|ref|XP_023860752.1|calcium-independent phospholipase A2-gamma [Salvelinus alpinus]	0	540	0.8214	Salvelinus alpinus	HYNIP00024CG0470	2.87214	6.22861	4.4e-08	1.67e-05			HYNIP00117CG0530	tripartite motif-containing protein 16-like protein	gi|1342943428|ref|XP_023847775.1|tripartite motif-containing protein 16-like protein [Salvelinus alpinus]	1.8e-167	360	0.6332	Salvelinus alpinus	HYNIP00117CG0530	-2.81606	2.0973	0.00110414	0.045944
HYNIP00108CG0200	solute carrier family 25 member 43	gi|1342976318|ref|XP_023845667.1|solute carrier family 25 member 43 [Salvelinus alpinus]	2.6e-161	240	0.9331	Salvelinus alpinus	HYNIP00108CG0200	2.86812	5.22394	2.63e-14	1.15e-10			HYNIP00494CG0020	vascular endothelial growth factor A-A-like	gi|225706986|gb|ACO09339.1|Vascular endothelial growth factor precursor [Osmerus mordax]	3.9e-46	90	0.7438	Osmerus mordax	HYNIP00494CG0020	-2.80487	2.17272	9.36e-05	0.00830522
HYNIP00288CG0150	serine/threonine-protein kinase SIK2-like	gi|1367489875|ref|XP_024301608.1|serine/threonine-protein kinase SIK2-like [Oncorhynchus tshawytscha]	0	470	0.7106	Oncorhynchus tshawytscha	HYNIP00288CG0150	2.84383	6.98402	5.69e-08	2.02e-05			HYNIP00369CG0130	zinc finger CCCH domain-containing protein 7B-like	gi|938076751|gb|KPP73441.1|zinc finger CCCH domain-containing protein 7B-like [Scleropages formosus]	6.6e-114	190	0.9005	Scleropages formosus	HYNIP00369CG0130	-2.75066	2.11654	0.00107851	0.04502
HYNIP00507CG0050	fibroblast growth factor 1 isoform X2	gi|1308534672|ref|XP_023148883.1|putative fibroblast growth factor 1 isoform X2 [Amphiprion ocellaris]	5.6e-71	130	0.8258	Amphiprion ocellaris	HYNIP00507CG0050	2.81174	4.78753	1.8e-12	3.95e-09			HYNIP00118CG0050	leucine-rich repeat-containing protein 15-like	gi|642124672|emb|CDQ62100.1|unnamed protein product [Oncorhynchus mykiss]	7.4e-92	200	0.6623	Oncorhynchus mykiss	HYNIP00118CG0050	-2.73794	1.59893	2.58e-05	0.00310788
HYNIP00361CG0030	E3 SUMO-protein ligase EGR2	gi|742209585|ref|XP_010895975.1|PREDICTED: E3 SUMO-protein ligase EGR2 [Esox lucius]	0	380	0.8979	Esox lucius	HYNIP00361CG0030	2.76291	4.8969	1.14e-09	6.84e-07			HYNIP00968CG0030	sacsin-like	gi|1564340291|gb|RXN35734.1|sacsin-like protein [Labeo rohita]	2.8e-158	340	0.7372	Labeo rohita	HYNIP00968CG0030	-2.7176	5.22996	0.000133159	0.0106763
HYNIP00904CG0100	transmembrane protein 244-like isoform X1	gi|1169022089|ref|XP_020462865.1|transmembrane protein 244-like isoform X1 [Monopterus albus]/gi|1169022091|ref|XP_020462866.1|transmembrane protein 244-like isoform X1 [Monopterus albus]/gi|1169022093|ref|XP_020462867.1|transmembrane protein 244-like isoform X1 [Monopterus albus]	9.4e-89	140	0.9211	Monopterus albus/Monopterus albus/Monopterus albus	HYNIP00904CG0100	2.74789	7.29085	5.03e-07	0.00014074			HYNIP00068CG0060	Interleukin-1 beta	gi|487395370|emb|CCN27133.1|Interleukin-1 beta [Plecoglossus altivelis]	1.5e-131	220	0.8007	Plecoglossus altivelis	HYNIP00068CG0060	-2.65577	2.74098	0.000289835	0.0187736
HYNIP00205CG0080	NUAK family SNF1-like kinase 1	gi|742239218|ref|XP_010903498.1|PREDICTED: NUAK family SNF1-like kinase 1 [Esox lucius]/gi|742239220|ref|XP_010903500.1|PREDICTED: NUAK family SNF1-like kinase 1 [Esox lucius]/gi|1137544322|ref|XP_019898157.1|PREDICTED: NUAK family SNF1-like kinase 1 [Esox lucius]	0	520	0.8242	Esox lucius/Esox lucius/Esox lucius	HYNIP00205CG0080	2.67674	2.6291	1.46e-07	4.58e-05			HYNIP00324CG0150	nuclear receptor subfamily 1 group D member 1-like	gi|1529917042|ref|XP_027144611.1|nuclear receptor subfamily 1 group D member 1 isoform X2 [Larimichthys crocea]	0	500	0.8537	Larimichthys crocea	HYNIP00324CG0150	-2.59362	3.92448	6.19e-08	2.14e-05
HYNIP00016CG0400	proto-oncogene c-Fos-like	gi|1529885133|ref|XP_019126174.2|proto-oncogene c-Fos isoform X3 [Larimichthys crocea]	1.6e-99	230	0.7304	Larimichthys crocea	HYNIP00016CG0400	2.62951	1.3583	3.48e-06	0.000643989			HYNIP00039CG0060	draxin	gi|1520566093|ref|XP_027023609.1|draxin-A-like isoform X1 [Tachysurus fulvidraco]	7.4e-37	76	0.6847	Tachysurus fulvidraco	HYNIP00039CG0060	-2.57163	1.91728	3.48e-05	0.00404846
HYNIP00733CG0020	sodium channel subunit beta-2	gi|1308422178|ref|XP_023132742.1|sodium channel subunit beta-2 [Amphiprion ocellaris]	8.2e-97	160	0.8368	Amphiprion ocellaris	HYNIP00733CG0020	2.59838	2.19274	2.96e-06	0.000573012			HYNIP00527CG0020	inhibin alpha chain	gi|1079783238|ref|XP_018516547.1|PREDICTED: inhibin alpha chain [Lates calcarifer]	7.5e-78	170	0.6459	Lates calcarifer	HYNIP00527CG0020	-2.55316	3.99869	0.000394907	0.0225766
HYNIP00136CG0080	nocturnin isoform X2	gi|1211264526|ref|XP_021416879.1|nocturnin-like [Oncorhynchus mykiss]	0	380	0.8164	Oncorhynchus mykiss	HYNIP00136CG0080	2.59063	5.81371	5.15e-11	4.51e-08			HYNIP00139CG0150	ALX homeobox protein 1	gi|742210180|ref|XP_010896152.1|PREDICTED: ALX homeobox protein 1 [Esox lucius]	0	310	0.9362	Esox lucius	HYNIP00139CG0150	-2.52221	-0.37226	0.000577459	0.0295376
HYNIP00074CG0210	ryanodine receptor 3 isoform X2	gi|1317118281|ref|XP_023270890.1|ryanodine receptor 3 isoform X2 [Seriola lalandi dorsalis]	0	750	0.9444	Seriola lalandi dorsalis	HYNIP00074CG0210	2.55464	2.34408	0.000168973	0.0126961			HYNIP00021CG0550	mitochondrial ubiquitin ligase activator of nfkb 1-A-like	gi|1473004569|ref|XP_026230473.1|mitochondrial ubiquitin ligase activator of nfkb 1-A-like [Anabas testudineus]	3.5e-128	200	0.8855	Anabas testudineus	HYNIP00021CG0550	-2.49653	0.711318	0.000972608	0.0422073
HYNIP00226CG0210	zinc finger and BTB domain-containing protein 7C	gi|1143427703|ref|XP_019968199.1|PREDICTED: zinc finger and BTB domain-containing protein 7C isoform X2 [Paralichthys olivaceus]	0	540	0.7932	Paralichthys olivaceus	HYNIP00226CG0210	2.51738	0.506899	0.000449288	0.0243115			HYNIP00171CG0350	protein 4.1-like	gi|966654140|gb|KTF88994.1|hypothetical protein cypCar_00009860, partial [Cyprinus carpio]	8e-103	150	0.9053	Cyprinus carpio	HYNIP00171CG0350	-2.47861	5.10297	4.93e-11	4.51e-08
HYNIP00047CG0650	receptor-interacting serine/threonine-protein kinase 2 isoform X1	gi|1343030182|ref|XP_023865011.1|receptor-interacting serine/threonine-protein kinase 2 isoform X1 [Salvelinus alpinus]	0	520	0.8904	Salvelinus alpinus	HYNIP00047CG0650	2.50646	5.98764	1.13e-12	2.97e-09			HYNIP00290CG0030	storkhead-box protein 1-like	gi|1211235315|ref|XP_021469867.1|storkhead-box protein 1-like [Oncorhynchus mykiss]	0	770	0.7093	Oncorhynchus mykiss	HYNIP00290CG0030	-2.46204	7.72228	2.49e-09	1.42e-06
HYNIP00057CG0210	connective tissue growth factor-like	gi|1342981778|ref|XP_023847446.1|connective tissue growth factor [Salvelinus alpinus]	2.1e-168	270	0.7384	Salvelinus alpinus	HYNIP00057CG0210	2.49958	4.65977	2.28e-10	1.76e-07			HYNIP00149CG0100	ATP-binding cassette sub-family G member 4	gi|1229005844|ref|XP_022067960.1|ATP-binding cassette sub-family G member 4 isoform X2 [Acanthochromis polyacanthus]	0	620	0.9596	Acanthochromis polyacanthus	HYNIP00149CG0100	-2.45495	3.69623	5.26e-05	0.00553093
HYNIP00015CG0350	cyclic AMP-dependent transcription factor ATF-3	gi|1367441136|ref|XP_024275911.1|cyclic AMP-dependent transcription factor ATF-3 [Oncorhynchus tshawytscha]	1.3e-103	180	0.8302	Oncorhynchus tshawytscha	HYNIP00015CG0350	2.49209	7.01794	5.91e-09	2.99e-06			HYNIP00056CG0260	carbonic anhydrase-like	gi|1357687271|ref|XP_024129250.1|carbonic anhydrase-like [Oryzias melastigma]	6.1e-141	210	0.9333	Oryzias melastigma	HYNIP00056CG0260	-2.4442	4.70823	0.000489549	0.026167
HYNIP01389CG0030	tripartite motif-containing protein 35-like	gi|1367417395|ref|XP_024266159.1|tripartite motif-containing protein 35-like, partial [Oncorhynchus tshawytscha]	2.5e-61	120	0.8369	Oncorhynchus tshawytscha	HYNIP01389CG0030	2.48358	1.57262	9.61e-05	0.00838509			HYNIP00228CG0250	pepsin A-like	gi|1342997022|ref|XP_023852341.1|pepsin A [Salvelinus alpinus]	4.8e-146	270	0.7335	Salvelinus alpinus	HYNIP00228CG0250	-2.44194	2.94687	5.59e-08	2.02e-05
HYNIP00824CG0060	pyruvate dehydrogenase (acetyl-transferring) kinase isozyme 2, mitochondrial-like	gi|1343037739|ref|XP_023868970.1|pyruvate dehydrogenase (acetyl-transferring) kinase isozyme 2, mitochondrial [Salvelinus alpinus]	1.7e-118	190	0.8416	Salvelinus alpinus	HYNIP00824CG0060	2.48201	10.0517	5.39e-09	2.83e-06			HYNIP00105CG0020	BRICHOS domain-containing protein 5	gi|742094841|ref|XP_010862245.1|PREDICTED: BRICHOS domain-containing protein 5 [Esox lucius]	1.3e-91	170	0.7094	Esox lucius	HYNIP00105CG0020	-2.4394	0.0970667	0.000809331	0.0376039
HYNIP00131CG0350	peptidyl-prolyl cis-trans isomerase FKBP5-like	gi|1168928465|ref|XP_020507498.1|peptidyl-prolyl cis-trans isomerase FKBP5-like [Labrus bergylta]/gi|1168928467|ref|XP_020507499.1|peptidyl-prolyl cis-trans isomerase FKBP5-like [Labrus bergylta]/gi|1168928469|ref|XP_020507500.1|peptidyl-prolyl cis-trans isomerase FKBP5-like [Labrus bergylta]	0	390	0.8678	Labrus bergylta/Labrus bergylta/Labrus bergylta	HYNIP00131CG0350	2.38852	8.55552	1.4e-11	1.55e-08			HYNIP00019CG0950	segment polarity protein dishevelled homolog DVL-2-like isoform X2	gi|929081474|ref|XP_014051185.1|PREDICTED: segment polarity protein dishevelled homolog DVL-2-like isoform X2 [Salmo salar]	0	670	0.8551	Salmo salar	HYNIP00019CG0950	-2.35893	5.92738	0.000362044	0.0213476
HYNIP00445CG0020	---NA---						HYNIP00445CG0020	2.38762	2.62336	2.18e-06	0.000447334			HYNIP00974CG0070	E3 ubiquitin-protein ligase MARCH2-like	gi|1343061302|ref|XP_023833312.1|E3 ubiquitin-protein ligase MARCH2 [Salvelinus alpinus]/gi|1343061304|ref|XP_023833313.1|E3 ubiquitin-protein ligase MARCH2 [Salvelinus alpinus]/gi|1343061306|ref|XP_023833314.1|E3 ubiquitin-protein ligase MARCH2 [Salvelinus alpinus]/gi|1343061308|ref|XP_023833316.1|E3 ubiquitin-protein ligase MARCH2 [Salvelinus alpinus]/gi|1343061310|ref|XP_023833317.1|E3 ubiquit…	1.9e-153	230	0.912	Salvelinus alpinus/Salvelinus alpinus/Salvelinus alpinus/Salvelinus alpinus/Salvelinus alpinus	HYNIP00974CG0070	-2.31131	4.47286	5.99e-10	4.04e-07
HYNIP00367CG0010	G2/M phase-specific E3 ubiquitin-protein ligase-like	gi|1317114651|ref|XP_023269004.1|G2/M phase-specific E3 ubiquitin-protein ligase-like [Seriola lalandi dorsalis]	9.2e-43	110	0.5161	Seriola lalandi dorsalis	HYNIP00367CG0010	2.34322	3.67047	2e-08	8.77e-06			HYNIP00007CG0930	nuclear GTPase SLIP-GC-like	gi|831273491|ref|XP_012680011.1|PREDICTED: nuclear GTPase SLIP-GC-like [Clupea harengus]	1.1e-133	230	0.8134	Clupea harengus	HYNIP00007CG0930	-2.3079	3.48035	0.00020269	0.0147439
HYNIP00043CG0040	NUAK family SNF1-like kinase 1	gi|1317090114|ref|XP_023256039.1|NUAK family SNF1-like kinase 1 [Seriola lalandi dorsalis]	0	550	0.8875	Seriola lalandi dorsalis	HYNIP00043CG0040	2.34298	6.72904	9.44e-08	3.1e-05			HYNIP00640CG0130	myosin light chain 5-like	gi|734650278|ref|XP_010754462.1|myosin light chain 5 isoform X1 [Larimichthys crocea]	2.2e-89	140	0.9252	Larimichthys crocea	HYNIP00640CG0130	-2.29123	1.17589	0.000544244	0.028511
HYNIP00026CG0390	sorbin and SH3 domain-containing protein 1-like isoform X4	gi|929266341|ref|XP_014009733.1|PREDICTED: sorbin and SH3 domain-containing protein 1-like [Salmo salar]	0	480	0.9355	Salmo salar	HYNIP00026CG0390	2.30068	7.47176	2.05e-10	1.69e-07			HYNIP00112CG0180	ETS-related transcription factor Elf-3-like	gi|1342942360|ref|XP_023842713.1|ETS-related transcription factor Elf-3 [Salvelinus alpinus]	2.1e-121	260	0.7097	Salvelinus alpinus	HYNIP00112CG0180	-2.27665	1.18112	9.41e-05	0.00830522
HYNIP00888CG0020	uncharacterized protein LOC111656111	gi|1317104179|ref|XP_023263460.1|uncharacterized protein LOC111656111 [Seriola lalandi dorsalis]	2.9e-91	340	0.5471	Seriola lalandi dorsalis	HYNIP00888CG0020	2.29368	5.3263	4.3e-09	2.36e-06			HYNIP00090CG0410	BTB/POZ domain-containing protein 3-like	gi|1343039032|ref|XP_023869633.1|BTB/POZ domain-containing protein 3 [Salvelinus alpinus]/gi|1343039034|ref|XP_023869634.1|BTB/POZ domain-containing protein 3 [Salvelinus alpinus]/gi|1343039036|ref|XP_023869635.1|BTB/POZ domain-containing protein 3 [Salvelinus alpinus]/gi|1343039038|ref|XP_023869636.1|BTB/POZ domain-containing protein 3 [Salvelinus alpinus]	0	440	0.959	Salvelinus alpinus/Salvelinus alpinus/Salvelinus alpinus/Salvelinus alpinus	HYNIP00090CG0410	-2.24997	4.11659	6.87e-09	3.35e-06
HYNIP00054CG0650	large neutral amino acids transporter small subunit 4-like isoform X1	gi|929086539|ref|XP_014053873.1|PREDICTED: large neutral amino acids transporter small subunit 4-like isoform X1 [Salmo salar]/gi|929086541|ref|XP_014053874.1|PREDICTED: large neutral amino acids transporter small subunit 4-like isoform X2 [Salmo salar]/gi|929086543|ref|XP_014053875.1|PREDICTED: large neutral amino acids transporter small subunit 4-like isoform X1 [Salmo salar]	1.2e-117	200	0.827	Salmo salar/Salmo salar/Salmo salar	HYNIP00054CG0650	2.28608	0.802561	0.000213743	0.0149797			HYNIP00089CG0070	Ig mu chain C region membrane-bound form	gi|380356146|dbj|BAL72569.1|immunoglobulin mu heavy chain secretory form [Plecoglossus altivelis altivelis]	0	390	0.8876	Plecoglossus altivelis altivelis	HYNIP00089CG0070	-2.22339	5.5563	0.000115485	0.0095504
HYNIP01228CG0040	Monocarboxylate transporter 9	gi|929267643|ref|XP_014010420.1|PREDICTED: monocarboxylate transporter 9-like isoform X2 [Salmo salar]	0	450	0.8944	Salmo salar	HYNIP01228CG0040	2.25884	6.7345	7.37e-07	0.000186251			HYNIP00068CG0740	ADAMTS-like protein 2	gi|1158882101|ref|XP_020345263.1|ADAMTS-like protein 2 isoform X2 [Oncorhynchus kisutch]	0	720	0.8759	Oncorhynchus kisutch	HYNIP00068CG0740	-2.21224	1.11475	6.93e-05	0.00685321
HYNIP00372CG0210	ras-related protein Rab-5A	gi|41393127|ref|NP_958893.1|RAB5A, member RAS oncogene family, a [Danio rerio]/gi|28838709|gb|AAH47803.1|RAB5A, member RAS oncogene family [Danio rerio]/gi|39645921|gb|AAH63966.1|Rab5a protein [Danio rerio]	1.3e-113	160	0.9814	Danio rerio/Danio rerio/Danio rerio	HYNIP00372CG0210	2.24527	5.2653	6.27e-07	0.000161546			HYNIP00399CG0160	Ig kappa chain V-III region MOPC 63 precursor	gi|642096299|emb|CDQ79246.1|unnamed protein product [Oncorhynchus mykiss]	3.3e-63	120	0.8394	Oncorhynchus mykiss	HYNIP00399CG0160	-2.19511	4.76862	6.48e-05	0.00650739
HYNIP00028CG0250	netrin-4-like	gi|1317142084|ref|XP_023283546.1|netrin-4-like [Seriola lalandi dorsalis]	0	350	0.8386	Seriola lalandi dorsalis	HYNIP00028CG0250	2.24285	1.7399	0.000383244	0.0221021			HYNIP00328CG0010	uncharacterized protein LOC110518699	gi|1211220932|ref|XP_021451820.1|uncharacterized protein LOC110518699 [Oncorhynchus mykiss]	7.2e-123	240	0.7431	Oncorhynchus mykiss	HYNIP00328CG0010	-2.18492	2.01705	0.000712551	0.0341947
HYNIP00023CG0250	neuroepithelial cell-transforming gene 1 protein	gi|1250127783|ref|XP_022605395.1|neuroepithelial cell-transforming gene 1 protein [Seriola dumerili]	0	500	0.8901	Seriola dumerili	HYNIP00023CG0250	2.21507	3.19192	5e-06	0.000876045			HYNIP00361CG0090	hematopoietically-expressed homeobox protein HHEX	gi|225707574|gb|ACO09633.1|Homeobox protein PRH [Osmerus mordax]	0	280	0.9892	Osmerus mordax	HYNIP00361CG0090	-2.17778	1.68347	5.3e-05	0.00553348
HYNIP00904CG0110	serine/threonine-protein kinase Sgk1-like	gi|742160793|ref|XP_010883042.1|PREDICTED: serine/threonine-protein kinase Sgk1 [Esox lucius]	0	330	0.7799	Esox lucius	HYNIP00904CG0110	2.18949	7.60856	4.5e-06	0.000810742			HYNIP00500CG0080	circadian-associated transcriptional repressor	gi|225707942|gb|ACO09817.1|C1orf51 [Osmerus mordax]	0	380	0.9595	Osmerus mordax	HYNIP00500CG0080	-2.16917	6.76535	2.57e-10	1.87e-07
HYNIP00016CG0390	proto-oncogene c-Fos-like	gi|472824847|dbj|BAN09075.1|proto-oncogene c-fos [Plecoglossus altivelis]	0	360	0.9783	Plecoglossus altivelis	HYNIP00016CG0390	2.14923	8.0933	4.7e-05	0.0051087			HYNIP00102CG0270	uncharacterized protein LOC112233649	gi|1367389716|ref|XP_024257172.1|uncharacterized protein LOC112233649 [Oncorhynchus tshawytscha]/gi|1367519781|ref|XP_024244222.1|uncharacterized protein LOC112224784 [Oncorhynchus tshawytscha]	0	480	0.6514	Oncorhynchus tshawytscha/Oncorhynchus tshawytscha	HYNIP00102CG0270	-2.16882	5.49866	0.000333253	0.0203771
HYNIP00929CG0080	plasminogen activator inhibitor 1-like	gi|929103155|ref|XP_014062667.1|PREDICTED: plasminogen activator inhibitor 1-like [Salmo salar]	4.4e-91	160	0.7419	Salmo salar	HYNIP00929CG0080	2.13807	5.86211	7.88e-07	0.000195599			HYNIP01490CG0010	interleukin-12 subunit beta-like	gi|929085935|ref|XP_014053573.1|PREDICTED: interleukin-12 subunit beta-like isoform X2 [Salmo salar]/gi|209736370|gb|ACI69054.1|Interleukin-12 subunit beta precursor [Salmo salar]	1e-73	180	0.5928	Salmo salar/Salmo salar	HYNIP01490CG0010	-2.12699	1.50628	0.00120155	0.0486006
HYNIP00048CG0120	U11/U12 small nuclear ribonucleoprotein 25 kDa protein isoform X1	gi|1158889155|ref|XP_020349057.1|uncharacterized protein LOC109898485 isoform X1 [Oncorhynchus kisutch]	9.9e-56	130	0.7416	Oncorhynchus kisutch	HYNIP00048CG0120	2.13099	2.89509	9.82e-05	0.00838509			HYNIP00025CG0540	nicotinamide phosphoribosyltransferase-like	gi|1469138809|ref|XP_026077192.1|nicotinamide phosphoribosyltransferase-like [Carassius auratus]	0	470	0.905	Carassius auratus	HYNIP00025CG0540	-2.1222	5.00627	0.000977601	0.0422844
HYNIP00010CG0480	spermine oxidase	gi|1211241619|ref|XP_021474798.1|spermine oxidase [Oncorhynchus mykiss]	0	310	0.912	Oncorhynchus mykiss	HYNIP00010CG0480	2.13097	6.56316	2.45e-08	1.04e-05			HYNIP00071CG0190	extracellular matrix protein 1-like	gi|1357734864|ref|XP_024154361.1|extracellular matrix protein 1-like [Oryzias melastigma]	1.8e-51	100	0.7203	Oryzias melastigma	HYNIP00071CG0190	-2.11408	5.36953	0.00123032	0.0490225
HYNIP00159CG0230	---NA---						HYNIP00159CG0230	2.12272	3.95207	1.25e-06	0.000298934			HYNIP00639CG0050	guanine nucleotide exchange factor VAV3 isoform X2	gi|795386143|ref|XP_011752201.1|guanine nucleotide exchange factor VAV3 isoform X3 [Macaca nemestrina]	2.6e-15	49	0.8305	Macaca nemestrina	HYNIP00639CG0050	-2.06724	4.43848	4.95e-06	0.000876045
HYNIP00095CG0040	cingulin-like protein 1	gi|1079776181|ref|XP_018558071.1|PREDICTED: uncharacterized protein LOC108901147 [Lates calcarifer]	6.9e-30	190	0.4628	Lates calcarifer	HYNIP00095CG0040	2.12248	1.78152	0.000561353	0.0291748			HYNIP00191CG0200	matrix metalloproteinase-9-like	gi|1250112966|ref|XP_022597292.1|matrix metalloproteinase-9 [Seriola dumerili]	0	580	0.861	Seriola dumerili	HYNIP00191CG0200	-2.01567	4.15617	0.000351858	0.0210823
HYNIP01301CG0030	putative monooxygenase p33MONOX	gi|1395240559|gb|AWP12166.1|putative monooxygenase p33MONOX [Scophthalmus maximus]	2.1e-137	260	0.7135	Scophthalmus maximus	HYNIP01301CG0030	2.11683	7.16907	3.24e-06	0.000616895			HYNIP00419CG0070	GTPase IMAP family member 4-like	gi|1211242320|ref|XP_021475158.1|GTPase IMAP family member 4-like [Oncorhynchus mykiss]	1.4e-05	45	0.5769	Oncorhynchus mykiss	HYNIP00419CG0070	-2.00107	5.25696	0.000205095	0.0148176
HYNIP00475CG0220	C-Jun-amino-terminal kinase-interacting protein 4-like	gi|1158838652|ref|XP_020327975.1|C-Jun-amino-terminal kinase-interacting protein 4-like [Oncorhynchus kisutch]	2.8e-145	280	0.7473	Oncorhynchus kisutch	HYNIP00475CG0220	2.10407	2.0014	0.000318615	0.0198188			HYNIP00689CG0100	ubiquitin carboxyl-terminal hydrolase 30 isoform X2	gi|742205176|ref|XP_010894675.1|PREDICTED: ubiquitin carboxyl-terminal hydrolase 30 isoform X2 [Esox lucius]/gi|1137517098|ref|XP_019907784.1|PREDICTED: ubiquitin carboxyl-terminal hydrolase 30 isoform X2 [Esox lucius]	0	390	0.8008	Esox lucius/Esox lucius	HYNIP00689CG0100	-1.99249	6.61522	7.77e-05	0.00745783
HYNIP00042CG0200	DNA repair-scaffolding protein isoform X2	gi|1168982365|ref|XP_020451309.1|DNA repair-scaffolding protein isoform X3 [Monopterus albus]	1.1e-101	260	0.5807	Monopterus albus	HYNIP00042CG0200	2.10057	2.00455	0.000154137	0.011922			HYNIP00039CG0540	nuclear pore membrane glycoprotein 210	gi|1211409665|ref|XP_021471220.1|nuclear pore membrane glycoprotein 210 [Oncorhynchus mykiss]	0	880	0.9182	Oncorhynchus mykiss	HYNIP00039CG0540	-1.98379	3.55927	1.05e-05	0.00156649
HYNIP01288CG0060	transforming growth factor beta-1-induced transcript 1 protein isoform X2	gi|1137496543|ref|XP_019902533.1|PREDICTED: transforming growth factor beta-1-induced transcript 1 protein isoform X4 [Esox lucius]	3.2e-132	220	0.8216	Esox lucius	HYNIP01288CG0060	2.09864	2.8946	0.000118019	0.00969897			HYNIP00683CG0160	aminopeptidase N-like	gi|1342958962|ref|XP_023840973.1|aminopeptidase N isoform X1 [Salvelinus alpinus]	1.6e-110	190	0.759	Salvelinus alpinus	HYNIP00683CG0160	-1.96202	2.42211	0.000433895	0.0241131
HYNIP01577CG0010	calponin-1	gi|1395247084|gb|AWP18449.1|Calponin [Scophthalmus maximus]	0	280	0.9362	Scophthalmus maximus	HYNIP01577CG0010	2.09264	3.07357	1.29e-05	0.00181059			HYNIP00791CG0040	NAD kinase 2, mitochondrial isoform X3	gi|1342954066|ref|XP_023839443.1|NAD kinase 2, mitochondrial isoform X3 [Salvelinus alpinus]	1.9e-176	290	0.7494	Salvelinus alpinus	HYNIP00791CG0040	-1.9598	4.64637	1.89e-05	0.00246326
HYNIP00783CG0070	protein Wnt-2b-A-like	gi|1158869477|ref|XP_020338513.1|protein Wnt-2b-A-like isoform X1 [Oncorhynchus kisutch]/gi|1211384092|ref|XP_021464948.1|protein Wnt-2b-A-like isoform X1 [Oncorhynchus mykiss]/gi|1367453253|ref|XP_024282328.1|protein Wnt-2b-A-like [Oncorhynchus tshawytscha]/gi|1367453383|ref|XP_024282398.1|protein Wnt-2b-A-like [Oncorhynchus tshawytscha]	0	320	0.9667	Oncorhynchus kisutch/Oncorhynchus mykiss/Oncorhynchus tshawytscha/Oncorhynchus tshawytscha	HYNIP00783CG0070	2.08328	1.62778	0.000327588	0.0201283			HYNIP00130CG0350	collagenase 3-like	gi|225706878|gb|ACO09285.1|Collagenase 3 precursor [Osmerus mordax]	0	460	0.9702	Osmerus mordax	HYNIP00130CG0350	-1.91804	4.35118	3.06e-05	0.00362956
HYNIP01427CG0050	glutamine--fructose-6-phosphate aminotransferase [isomerizing] 2-like	gi|1308402324|ref|XP_023127431.1|glutamine--fructose-6-phosphate aminotransferase [isomerizing] 2-like [Amphiprion ocellaris]	1.6e-150	240	0.903	Amphiprion ocellaris	HYNIP01427CG0050	2.05798	3.86751	9.75e-05	0.00838509			HYNIP00181CG0400	GTPase-activating protein and VPS9 domain-containing protein 1-like isoform X1	gi|1168892447|ref|XP_020488610.1|LOW QUALITY PROTEIN: GTPase-activating protein and VPS9 domain-containing protein 1 [Labrus bergylta]	0	400	0.8584	Labrus bergylta	HYNIP00181CG0400	-1.91599	1.94263	0.000355335	0.0211417
HYNIP00427CG0050	predicted protein	gi|524790700|emb|CDE86198.1|predicted protein [Prevotella sp. CAG:891]	1.3e-13	62	0.5345	Prevotella sp. CAG:891	HYNIP00427CG0050	2.04646	2.80559	4.59e-05	0.00502529			HYNIP01435CG0020	5-hydroxytryptamine receptor 3A-like	gi|1387726255|gb|PWA21689.1|hypothetical protein CCH79_00003133, partial [Gambusia affinis]	4e-86	290	0.5312	Gambusia affinis	HYNIP01435CG0020	-1.91496	2.19738	0.000280146	0.0184182
HYNIP00824CG0070	piggyBac transposable element-derived protein 4-like	gi|1316033378|ref|XP_023182619.1|piggyBac transposable element-derived protein 4-like [Xiphophorus maculatus]	0	420	0.7614	Xiphophorus maculatus	HYNIP00824CG0070	2.00756	2.02374	0.000238548	0.0162521			HYNIP01761CG0010	transcription factor AP-4 isoform X2	gi|1529894437|ref|XP_010737692.3|transcription factor AP-4 isoform X2 [Larimichthys crocea]	1.3e-121	210	0.7881	Larimichthys crocea	HYNIP01761CG0010	-1.90234	3.51564	9.82e-05	0.00838509
HYNIP00134CG0250	chloride channel protein 1-like	gi|1308395179|ref|XP_023125328.1|chloride channel protein 1-like [Amphiprion ocellaris]	0	410	0.8766	Amphiprion ocellaris	HYNIP00134CG0250	1.99969	3.23278	0.000541789	0.0284959			HYNIP00017CG0630	cytochrome P450 27C1-like	gi|1020407792|ref|XP_016122461.1|PREDICTED: sterol 26-hydroxylase, mitochondrial-like [Sinocyclocheilus grahami]	0	380	0.8501	Sinocyclocheilus grahami	HYNIP00017CG0630	-1.90217	7.396	7.44e-08	2.51e-05
HYNIP01116CG0050	zyxin	gi|1317139586|ref|XP_023282220.1|LOW QUALITY PROTEIN: zyxin [Seriola lalandi dorsalis]	0	430	0.7535	Seriola lalandi dorsalis	HYNIP01116CG0050	1.99393	3.35928	1.12e-05	0.00160179			HYNIP01212CG0050	leukocyte elastase inhibitor-like isoform X2	gi|225706746|gb|ACO09219.1|Leukocyte elastase inhibitor [Osmerus mordax]	0	360	0.9629	Osmerus mordax	HYNIP01212CG0050	-1.88756	3.16756	0.00030361	0.0192858
HYNIP01003CG0030	histidine-rich glycoprotein-like	gi|929106491|ref|XP_014064443.1|PREDICTED: histidine-rich glycoprotein-like [Salmo salar]	1.9e-16	200	0.5519	Salmo salar	HYNIP01003CG0030	1.97895	0.956354	0.000288566	0.0187736			HYNIP00055CG0060	nuclear receptor subfamily 1 group D member 1-like	gi|1228997775|ref|XP_022063708.1|nuclear receptor subfamily 1 group D member 1-like [Acanthochromis polyacanthus]	0	490	0.8649	Acanthochromis polyacanthus	HYNIP00055CG0060	-1.88678	6.59497	3.44e-06	0.000643989
HYNIP00089CG0170	calcium-binding mitochondrial carrier protein SCaMC-3-like	gi|657575537|ref|XP_008291509.1|PREDICTED: calcium-binding mitochondrial carrier protein SCaMC-3-like [Stegastes partitus]	0	370	0.7623	Stegastes partitus	HYNIP00089CG0170	1.96999	1.58566	8.3e-05	0.00779184			HYNIP00551CG0080	integrin alpha-2-like	gi|1211248452|ref|XP_021478375.1|integrin alpha-2-like [Oncorhynchus mykiss]	0	870	0.8496	Oncorhynchus mykiss	HYNIP00551CG0080	-1.87925	2.28829	0.000652736	0.0325681
HYNIP01571CG0020	nectin-2 isoform X1	gi|929064972|ref|XP_014015209.1|PREDICTED: nectin-1-like [Salmo salar]	1.8e-97	200	0.7874	Salmo salar	HYNIP01571CG0020	1.9549	1.96407	0.000129897	0.0104786			HYNIP00441CG0110	---NA---						HYNIP00441CG0110	-1.8718	2.56224	0.000251674	0.0169978
HYNIP00073CG0020	uridine-cytidine kinase-like 1 isoform X2	gi|1228968476|ref|XP_022047763.1|uridine-cytidine kinase-like 1 isoform X3 [Acanthochromis polyacanthus]	0	460	0.9371	Acanthochromis polyacanthus	HYNIP00073CG0020	1.94318	8.15256	2.16e-06	0.000447334			HYNIP00847CG0030	Krueppel-like factor 1	gi|929219898|ref|XP_013986126.1|PREDICTED: zinc finger protein 120-like [Salmo salar]/gi|929219900|ref|XP_013986127.1|PREDICTED: zinc finger protein 120-like [Salmo salar]	3.9e-150	280	0.7045	Salmo salar/Salmo salar	HYNIP00847CG0030	-1.86188	3.29762	0.000320949	0.0198188
HYNIP00545CG0020	cAMP-specific 3',5'-cyclic phosphodiesterase 4D isoform X5	gi|1348572776|ref|XP_023997892.1|cAMP-specific 3',5'-cyclic phosphodiesterase 4D-like, partial [Salvelinus alpinus]	1.3e-71	140	0.7446	Salvelinus alpinus	HYNIP00545CG0020	1.93739	1.02766	0.000309318	0.0195539			HYNIP00290CG0020	cell division cycle and apoptosis regulator protein 1-like isoform X2	gi|1137498170|ref|XP_019903017.1|PREDICTED: cell division cycle and apoptosis regulator protein 1 isoform X4 [Esox lucius]	0	500	0.8938	Esox lucius	HYNIP00290CG0020	-1.85356	5.22981	9.69e-06	0.0014649
HYNIP00372CG0050	cyclic AMP-responsive element-binding protein 5-like	gi|1228956828|ref|XP_022049937.1|cyclic AMP-responsive element-binding protein 5-like isoform X2 [Acanthochromis polyacanthus]	1.4e-33	68	0.8831	Acanthochromis polyacanthus	HYNIP00372CG0050	1.92574	2.35066	0.00014167	0.0112218			HYNIP00258CG0120	hairy/enhancer-of-split related with YRPW motif protein 1	gi|734611725|ref|XP_010733281.1|hairy/enhancer-of-split related with YRPW motif protein 1 [Larimichthys crocea]	1.2e-174	300	0.8592	Larimichthys crocea	HYNIP00258CG0120	-1.85137	4.70746	2.96e-06	0.000573012
HYNIP00721CG0060	selenocysteine lyase	gi|291190492|ref|NP_001167277.1|selenocysteine lyase [Salmo salar]/gi|223648998|gb|ACN11257.1|Selenocysteine lyase [Salmo salar]	1.1e-70	120	0.8803	Salmo salar/Salmo salar	HYNIP00721CG0060	1.92409	5.9138	0.00100568	0.0432145			HYNIP00196CG0040	death-inducer obliterator 1-like isoform X1	gi|1211282389|ref|XP_021425360.1|death-inducer obliterator 1-like [Oncorhynchus mykiss]	0	600	0.7624	Oncorhynchus mykiss	HYNIP00196CG0040	-1.8437	5.52063	6.28e-06	0.00103274
HYNIP00020CG0480	multidrug resistance-associated protein 5-like	gi|929087866|ref|XP_014054571.1|PREDICTED: multidrug resistance-associated protein 5-like [Salmo salar]/gi|929087868|ref|XP_014054572.1|PREDICTED: multidrug resistance-associated protein 5-like [Salmo salar]	0	1300	0.8937	Salmo salar/Salmo salar	HYNIP00020CG0480	1.91773	8.34731	7.35e-06	0.00117874			HYNIP00333CG0090	nicotinamide/nicotinic acid mononucleotide adenylyltransferase 1	gi|928044589|ref|XP_013871189.1|PREDICTED: nicotinamide/nicotinic acid mononucleotide adenylyltransferase 1 [Austrofundulus limnaeus]	2.2e-131	210	0.7673	Austrofundulus limnaeus	HYNIP00333CG0090	-1.83629	3.82094	9.88e-05	0.00838509
HYNIP00328CG0090	DUF3585 domain containing protein	gi|1308480732|ref|XP_023145177.1|uncharacterized protein C16orf45 homolog [Amphiprion ocellaris]	1.3e-119	180	0.9095	Amphiprion ocellaris	HYNIP00328CG0090	1.91059	1.33249	0.00106892	0.0449049			HYNIP00028CG0210	transmembrane and coiled-coil domain protein 3-like	gi|1079741305|ref|XP_018540012.1|PREDICTED: transmembrane and coiled-coil domains protein 3-like isoform X2 [Lates calcarifer]	0	420	0.8693	Lates calcarifer	HYNIP00028CG0210	-1.81549	3.44706	4.74e-05	0.00511276
HYNIP00047CG0500	Os08g0530033	gi|937931468|dbj|BAT06384.1|Os08g0530033 [Oryza sativa Japonica Group]	1.2e-07	33	0.7174	Oryza sativa Japonica Group	HYNIP00047CG0500	1.90831	2.98424	1.58e-05	0.0021669			HYNIP01046CG0050	influenza virus NS1A-binding protein	gi|736195892|ref|XP_010772706.1|PREDICTED: influenza virus NS1A-binding protein [Notothenia coriiceps]/gi|736195894|ref|XP_010772707.1|PREDICTED: influenza virus NS1A-binding protein [Notothenia coriiceps]/gi|736195897|ref|XP_010772708.1|PREDICTED: influenza virus NS1A-binding protein [Notothenia coriiceps]	0	380	0.91	Notothenia coriiceps/Notothenia coriiceps/Notothenia coriiceps	HYNIP01046CG0050	-1.78625	6.57709	1.67e-05	0.00224099
HYNIP00901CG0060	glutathione-specific gamma-glutamylcyclotransferase 1-like	gi|1342963561|ref|XP_023842013.1|glutathione-specific gamma-glutamylcyclotransferase 1 [Salvelinus alpinus]	5.8e-118	170	0.9355	Salvelinus alpinus	HYNIP00901CG0060	1.90033	8.37834	5.43e-07	0.000145707			HYNIP00259CG0150	ADP-ribosylation factor-related protein 1	gi|1063243476|gb|ODQ66269.1|P-loop containing nucleoside triphosphate hydrolase protein [Nadsonia fulvescens var. elongata DSM 6958]	3.9e-06	39	0.6393	Nadsonia fulvescens var. elongata DSM 6958	HYNIP00259CG0150	-1.7837	5.34644	0.00031755	0.0198188
HYNIP01059CG0060	transcription factor AP-1-like	gi|570709890|gb|AHE93338.1|c-Jun [Epinephelus coioides]	0	290	0.9256	Epinephelus coioides	HYNIP01059CG0060	1.89178	7.91364	2.64e-06	0.000526291			HYNIP00029CG0620	---NA---						HYNIP00029CG0620	-1.78005	5.17947	7.48e-06	0.00118459
HYNIP00067CG0290	dynein heavy chain 12, axonemal-like	gi|1079744187|ref|XP_018541546.1|PREDICTED: dynein heavy chain 12, axonemal-like [Lates calcarifer]	0	420	0.8998	Lates calcarifer	HYNIP00067CG0290	1.88792	2.86154	0.000902667	0.0407875			HYNIP00482CG0110	trophoblast glycoprotein-like	gi|1169024237|ref|XP_020464029.1|trophoblast glycoprotein-like [Monopterus albus]	3.1e-147	260	0.7861	Monopterus albus	HYNIP00482CG0110	-1.77304	3.05494	0.000435336	0.0241131
HYNIP00522CG0110	CLOCK-interacting pacemaker-like	gi|1529883124|ref|XP_019118791.2|CLOCK-interacting pacemaker-like [Larimichthys crocea]	1.5e-108	270	0.6838	Larimichthys crocea	HYNIP00522CG0110	1.88337	4.73824	3.59e-06	0.000655674			HYNIP01009CG0050	erythropoietin receptor-like	gi|1109490852|gb|APG32502.1|erythropoietin receptor [Plecoglossus altivelis]	0	480	0.8929	Plecoglossus altivelis	HYNIP01009CG0050	-1.76329	5.03942	3.88e-05	0.00444091
HYNIP00197CG0010	cryptochrome-1-like isoform X1	gi|1387738946|gb|PWA29462.1|hypothetical protein CCH79_00017079, partial [Gambusia affinis]	0	550	0.7772	Gambusia affinis	HYNIP00197CG0010	1.88081	5.6901	8.19e-07	0.000199402			HYNIP01974CG0020	interleukin-12 subunit alpha-like	gi|971454720|emb|CDM74104.1|interleukin-12 p35a1 subunit [Salmo salar]	6.2e-29	81	0.5664	Salmo salar	HYNIP01974CG0020	-1.76035	2.21631	0.00114106	0.0467407
HYNIP00252CG0180	endoplasmic reticulum membrane sensor NFE2L1	gi|929275695|ref|XP_014014597.1|PREDICTED: nuclear factor erythroid 2-related factor 1 [Salmo salar]/gi|929275697|ref|XP_014014598.1|PREDICTED: nuclear factor erythroid 2-related factor 1 [Salmo salar]	0	740	0.9322	Salmo salar/Salmo salar	HYNIP00252CG0180	1.8787	5.81939	2.21e-07	6.6e-05			HYNIP01172CG0070	gamma-taxilin-like	gi|742167392|ref|XP_010884740.1|PREDICTED: gamma-taxilin isoform X2 [Esox lucius]	0	390	0.8092	Esox lucius	HYNIP01172CG0070	-1.74815	6.94547	1.69e-06	0.0003802
HYNIP00004CG0650	alpha-protein kinase 3-like	gi|1317112233|ref|XP_023267739.1|alpha-protein kinase 3 isoform X2 [Seriola lalandi dorsalis]	0	520	0.7271	Seriola lalandi dorsalis	HYNIP00004CG0650	1.8741	8.01346	0.00021013	0.0148548			HYNIP00030CG0260	E3 ubiquitin-protein ligase UHRF1	gi|742102014|ref|XP_010869555.1|PREDICTED: E3 ubiquitin-protein ligase UHRF1 [Esox lucius]	0	740	0.84	Esox lucius	HYNIP00030CG0260	-1.73815	4.27808	4.05e-05	0.00459238
HYNIP00106CG0080	death-associated protein kinase 3	gi|1343060788|ref|XP_023833044.1|death-associated protein kinase 3 [Salvelinus alpinus]/gi|1343060790|ref|XP_023833045.1|death-associated protein kinase 3 [Salvelinus alpinus]	0	290	0.9542	Salvelinus alpinus/Salvelinus alpinus	HYNIP00106CG0080	1.83904	4.87604	2.06e-07	6.28e-05			HYNIP00939CG0010	exonuclease 3'-5' domain-containing protein 2 isoform X1	gi|1395244562|gb|AWP16069.1|putative exonuclease 3'-5' domain-containing protein 2 [Scophthalmus maximus]	0	340	0.7149	Scophthalmus maximus	HYNIP00939CG0010	-1.72898	4.62098	1.73e-05	0.00230116
HYNIP00163CG0250	PDZ and LIM domain protein 2-like	gi|972948626|ref|XP_015196203.1|PREDICTED: PDZ and LIM domain protein 2 isoform X1 [Lepisosteus oculatus]	5.2e-12	110	0.4397	Lepisosteus oculatus	HYNIP00163CG0250	1.83459	3.89212	2.22e-05	0.00280406			HYNIP00212CG0220	---NA---						HYNIP00212CG0220	-1.71797	1.38653	0.000926738	0.0410292
HYNIP00282CG0070	ras-like protein family member 12	gi|929132479|ref|XP_013983073.1|PREDICTED: ras-like protein family member 12 isoform X2 [Salmo salar]/gi|929132481|ref|XP_013983074.1|PREDICTED: ras-like protein family member 12 isoform X2 [Salmo salar]	8.2e-71	110	0.9565	Salmo salar/Salmo salar	HYNIP00282CG0070	1.83318	5.0923	2.59e-06	0.000523182			HYNIP00229CG0140	---NA---						HYNIP00229CG0140	-1.70952	2.36297	0.000202955	0.0147439
HYNIP00252CG0190	chromobox protein homolog 1	gi|1211273635|ref|XP_021420677.1|chromobox protein homolog 1 isoform X2 [Oncorhynchus mykiss]	7.2e-79	130	0.8926	Oncorhynchus mykiss	HYNIP00252CG0190	1.82973	6.03123	1.37e-07	4.4e-05			HYNIP01432CG0030	adenosine deaminase CECR1 isoform X2	gi|1342961695|ref|XP_023841607.1|adenosine deaminase 2 [Salvelinus alpinus]	0	440	0.8792	Salvelinus alpinus	HYNIP01432CG0030	-1.70285	7.36238	6.27e-06	0.00103274
HYNIP00271CG0100	metalloproteinase inhibitor 3	gi|1228963479|ref|XP_022045031.1|metalloproteinase inhibitor 3 [Acanthochromis polyacanthus]	3.8e-115	180	0.7419	Acanthochromis polyacanthus	HYNIP00271CG0100	1.82869	4.31584	0.000336405	0.0203843			HYNIP00285CG0090	nuclear receptor coactivator 4 isoform X1	gi|929054902|ref|XP_014056680.1|PREDICTED: nuclear receptor coactivator 4 isoform X1 [Salmo salar]	0	490	0.773	Salmo salar	HYNIP00285CG0090	-1.67738	7.6213	1.72e-06	0.0003802
HYNIP00071CG0120	eyes absent homolog 3-like isoform X1	gi|1158902046|ref|XP_020355775.1|eyes absent homolog 3-like isoform X3 [Oncorhynchus kisutch]	0	500	0.8656	Oncorhynchus kisutch	HYNIP00071CG0120	1.81864	4.50536	7.69e-06	0.00118984			HYNIP00271CG0110	poly [ADP-ribose] polymerase 12-like	gi|1042306121|ref|XP_017349504.1|PREDICTED: poly [ADP-ribose] polymerase 12-like [Ictalurus punctatus]	8.1e-167	360	0.5928	Ictalurus punctatus	HYNIP00271CG0110	-1.67443	6.95604	0.000207813	0.0148491
HYNIP00282CG0140	ras GTPase-activating-like protein IQGAP1	gi|1248975078|ref|XP_022541597.1|ras GTPase-activating-like protein IQGAP1 [Astyanax mexicanus]	0	1300	0.8267	Astyanax mexicanus	HYNIP00282CG0140	1.80359	5.52804	3.16e-07	9.23e-05			HYNIP00770CG0060	lipoprotein lipase-like	gi|1211231333|ref|XP_021435556.1|lipoprotein lipase-like [Oncorhynchus mykiss]/gi|642130526|emb|CDQ57894.1|unnamed protein product [Oncorhynchus mykiss]	1.4e-147	230	0.9187	Oncorhynchus mykiss/Oncorhynchus mykiss	HYNIP00770CG0060	-1.66084	4.11079	0.000438287	0.0241131
HYNIP00350CG0110	UDP-glucuronosyltransferase 2A2	gi|213514842|ref|NP_001133343.1|UDP-glucuronosyltransferase 2A2 [Salmo salar]/gi|929274504|ref|XP_014013961.1|PREDICTED: UDP-glucuronosyltransferase 2A2 isoform X1 [Salmo salar]/gi|929274506|ref|XP_014013962.1|PREDICTED: UDP-glucuronosyltransferase 2A2 isoform X1 [Salmo salar]/gi|929274508|ref|XP_014013963.1|PREDICTED: UDP-glucuronosyltransferase 2A2 isoform X1 [Salmo salar]/gi|209151120|gb|ACI33…	5.4e-177	290	0.8969	Salmo salar/Salmo salar/Salmo salar/Salmo salar/Salmo salar	HYNIP00350CG0110	1.79055	8.80837	1.73e-06	0.0003802			HYNIP00538CG0030	uncharacterized protein LOC112216901	gi|1367498139|ref|XP_024232812.1|uncharacterized protein LOC112216901 [Oncorhynchus tshawytscha]	4.4e-08	100	0.4574	Oncorhynchus tshawytscha	HYNIP00538CG0030	-1.65865	7.51075	0.000365142	0.0214311
HYNIP00093CG0020	adhesion G-protein coupled receptor G2	gi|1529965024|ref|XP_027130283.1|adhesion G-protein coupled receptor G2 [Larimichthys crocea]	4.4e-161	290	0.8963	Larimichthys crocea	HYNIP00093CG0020	1.79023	2.45362	0.000283977	0.0185772			HYNIP01527CG0050	endonuclease domain-containing 1 protein-like	gi|1367430044|ref|XP_024249206.1|endonuclease domain-containing 1 protein-like [Oncorhynchus tshawytscha]	4.6e-146	320	0.6709	Oncorhynchus tshawytscha	HYNIP01527CG0050	-1.64839	4.80574	1.21e-05	0.00171347
HYNIP00213CG0290	sodium-coupled neutral amino acid transporter 3-like isoform X1	gi|1342995242|ref|XP_023851777.1|sodium-coupled neutral amino acid transporter 3 isoform X2 [Salvelinus alpinus]	0	470	0.9058	Salvelinus alpinus	HYNIP00213CG0290	1.77948	5.42021	0.000646645	0.0324532			HYNIP00588CG0060	nuclear factor 7, ovary-like	gi|1211307209|ref|XP_021433930.1|tripartite motif-containing protein 14-like [Oncorhynchus mykiss]	0	340	0.7176	Oncorhynchus mykiss	HYNIP00588CG0060	-1.64258	2.71465	0.00045281	0.0244017
HYNIP00013CG0100	RNA polymerase II elongation factor ELL-like	gi|1049241588|ref|XP_017559732.1|PREDICTED: RNA polymerase II elongation factor ELL2-like [Pygocentrus nattereri]	0	430	0.7232	Pygocentrus nattereri	HYNIP00013CG0100	1.747	4.96624	4.22e-07	0.00012056			HYNIP00191CG0180	5' exonuclease Apollo	gi|1367496840|ref|XP_024232126.1|5' exonuclease Apollo [Oncorhynchus tshawytscha]/gi|1367496842|ref|XP_024232127.1|5' exonuclease Apollo [Oncorhynchus tshawytscha]/gi|1367496844|ref|XP_024232128.1|5' exonuclease Apollo [Oncorhynchus tshawytscha]	0	440	0.6954	Oncorhynchus tshawytscha/Oncorhynchus tshawytscha/Oncorhynchus tshawytscha	HYNIP00191CG0180	-1.63721	4.54634	8.61e-06	0.00131674
HYNIP00028CG0060	tetraspanin-33-like	gi|1228979268|ref|XP_022053612.1|tetraspanin-33-like [Acanthochromis polyacanthus]	1.5e-107	170	0.7844	Acanthochromis polyacanthus	HYNIP00028CG0060	1.7352	3.35118	5.36e-05	0.00554675			HYNIP00042CG0050	putative ATP-dependent RNA helicase DHX30	gi|742087468|ref|XP_010883624.1|PREDICTED: putative ATP-dependent RNA helicase DHX30 [Esox lucius]	0	960	0.8033	Esox lucius	HYNIP00042CG0050	-1.63378	6.27834	0.000164491	0.0125023
HYNIP00470CG0030	TNFAIP3-interacting protein 1-like	gi|1168893770|ref|XP_020489341.1|TNFAIP3-interacting protein 1-like [Labrus bergylta]	5.1e-54	150	0.6417	Labrus bergylta	HYNIP00470CG0030	1.73004	6.26093	1.75e-05	0.00230562			HYNIP00118CG0070	transcription factor HES-1-like	gi|929119447|ref|XP_014071333.1|PREDICTED: transcription factor HES-1-like [Salmo salar]/gi|1158898820|ref|XP_020354105.1|transcription factor HES-1-like [Oncorhynchus kisutch]/gi|1211363249|ref|XP_021458997.1|transcription factor HES-1-like [Oncorhynchus mykiss]/gi|1367442603|ref|XP_024276705.1|transcription factor HES-1-like [Oncorhynchus tshawytscha]/gi|221222258|gb|ACM09790.1|Transcription fa…	0	260	0.9588	Salmo salar/Oncorhynchus kisutch/Oncorhynchus mykiss/Oncorhynchus tshawytscha/Salmo salar	HYNIP00118CG0070	-1.6291	3.52635	0.000159913	0.012225
HYNIP00369CG0100	DNA-directed RNA polymerase III subunit RPC8	gi|1515169706|gb|ROL41309.1|DNA-directed RNA polymerase III subunit RPC8 [Anabarilius grahami]	3.8e-136	230	0.6374	Anabarilius grahami	HYNIP00369CG0100	1.72862	4.18075	1.93e-05	0.00248317			HYNIP00851CG0020	hypothetical protein DPX16_22646	gi|1515183406|gb|ROL45729.1|hypothetical protein DPX16_22646 [Anabarilius grahami]	1.4e-61	200	0.5	Anabarilius grahami	HYNIP00851CG0020	-1.62858	2.76418	0.000401605	0.0227684
HYNIP00215CG0140	protein FAM83H isoform X1	gi|1079767631|ref|XP_018553512.1|PREDICTED: protein FAM83H [Lates calcarifer]/gi|1079767633|ref|XP_018553513.1|PREDICTED: protein FAM83H [Lates calcarifer]	0	940	0.7528	Lates calcarifer/Lates calcarifer	HYNIP00215CG0140	1.72518	4.44812	1.11e-05	0.00160003			HYNIP00151CG0380	mitogen-activated protein kinase-binding protein 1-like	gi|1083312638|ref|XP_018606048.1|PREDICTED: mitogen-activated protein kinase-binding protein 1-like [Scleropages formosus]	9.4e-76	230	0.5746	Scleropages formosus	HYNIP00151CG0380	-1.58913	3.84459	5.77e-05	0.00588193
HYNIP00007CG0590	alpha-actinin-1 isoform X2	gi|1025232749|ref|XP_016364206.1|PREDICTED: alpha-actinin-1-like isoform X2 [Sinocyclocheilus rhinocerous]	0	660	0.985	Sinocyclocheilus rhinocerous	HYNIP00007CG0590	1.72497	6.06458	5.6e-06	0.000956774			HYNIP00055CG0170	class E basic helix-loop-helix protein 40-like	gi|1529992089|ref|XP_027135267.1|class E basic helix-loop-helix protein 40-like [Larimichthys crocea]	0	380	0.8701	Larimichthys crocea	HYNIP00055CG0170	-1.57905	5.96316	0.000166277	0.0125654
HYNIP00474CG0080	plastin-1-like	gi|742166589|ref|XP_010884531.1|PREDICTED: plastin-1 [Esox lucius]/gi|742166599|ref|XP_010884533.1|PREDICTED: plastin-1 [Esox lucius]/gi|1137543797|ref|XP_019898025.1|PREDICTED: plastin-1 [Esox lucius]	0	550	0.8614	Esox lucius/Esox lucius/Esox lucius	HYNIP00474CG0080	1.71995	4.99667	0.000956576	0.0419267			HYNIP00002CG0200	von Willebrand factor A domain-containing protein 1-like	gi|1211386273|ref|XP_021465535.1|von Willebrand factor A domain-containing protein 1-like [Oncorhynchus mykiss]	5.7e-170	320	0.7317	Oncorhynchus mykiss	HYNIP00002CG0200	-1.57184	5.27955	0.00119257	0.0483984
HYNIP00593CG0080	neutral amino acid transporter B(0)	gi|1168904241|ref|XP_020494976.1|neutral amino acid transporter B(0) [Labrus bergylta]	0	400	0.8785	Labrus bergylta	HYNIP00593CG0080	1.71411	4.21552	2.1e-05	0.00268386			HYNIP00613CG0090	RNA exonuclease 4	gi|929151762|ref|XP_013983421.1|PREDICTED: REX4, RNA exonuclease 4 homolog isoform X2 [Salmo salar]	2e-133	260	0.7187	Salmo salar	HYNIP00613CG0090	-1.54551	5.40571	0.0010454	0.044342
HYNIP00151CG0260	ryanodine receptor 1 isoform X1	gi|1168923474|ref|XP_020504847.1|LOW QUALITY PROTEIN: ryanodine receptor 1-like [Labrus bergylta]	0	940	0.9468	Labrus bergylta	HYNIP00151CG0260	1.71322	4.96166	0.000196899	0.0144638			HYNIP00085CG0280	rap guanine nucleotide exchange factor 1-like	gi|694646979|ref|XP_009480769.1|PREDICTED: rap guanine nucleotide exchange factor 1-like, partial [Pelecanus crispus]	3.3e-173	280	0.8742	Pelecanus crispus	HYNIP00085CG0280	-1.53082	4.02748	0.00112664	0.0465853
HYNIP00695CG0050	mucin-5AC-like isoform X2	gi|1250110018|ref|XP_022595699.1|uncharacterized protein LOC111217932 [Seriola dumerili]	3.1e-118	180	0.8619	Seriola dumerili	HYNIP00695CG0050	1.70367	3.85757	5.17e-06	0.000895275			HYNIP00007CG0660	pecanex-like protein 1 isoform X1	gi|1337268092|gb|POI30139.1|hypothetical protein CIB84_006113 [Bambusicola thoracicus]	0	450	0.8791	Bambusicola thoracicus	HYNIP00007CG0660	-1.5119	3.57362	0.000681085	0.0334164
HYNIP00047CG0620	protein zyg-11 homolog isoform X1	gi|1158949172|ref|XP_020323140.1|protein zyg-11 homolog isoform X1 [Oncorhynchus kisutch]	0	640	0.8585	Oncorhynchus kisutch	HYNIP00047CG0620	1.70157	5.08403	1.68e-06	0.0003802			HYNIP00028CG0360	troponin I, slow skeletal muscle-like isoform X1	gi|1387737214|gb|PWA28505.1|hypothetical protein CCH79_00016319, partial [Gambusia affinis]	0	390	0.8259	Gambusia affinis	HYNIP00028CG0360	-1.51105	6.31864	0.000802376	0.037546
HYNIP00533CG0100	protein phosphatase 1 regulatory subunit 12C-like isoform X2	gi|1158851562|ref|XP_020336336.1|protein phosphatase 1 regulatory subunit 12C-like isoform X2 [Oncorhynchus kisutch]	2.2e-79	130	0.9167	Oncorhynchus kisutch	HYNIP00533CG0100	1.69651	3.2289	0.000874583	0.0400693			HYNIP00163CG0340	---NA---						HYNIP00163CG0340	-1.50578	5.5849	2.28e-05	0.00285055
HYNIP00281CG0170	CLOCK-interacting pacemaker-like	gi|1342965327|ref|XP_023842408.1|CLOCK-interacting pacemaker isoform X1 [Salvelinus alpinus]	2.4e-94	240	0.6501	Salvelinus alpinus	HYNIP00281CG0170	1.68978	5.26836	0.000215313	0.0149797			HYNIP00610CG0120	leucine-rich repeat-containing protein 43 isoform X1	gi|929279881|ref|XP_014016802.1|PREDICTED: leucine-rich repeat-containing protein 43 isoform X1 [Salmo salar]	0	420	0.6553	Salmo salar	HYNIP00610CG0120	-1.49994	6.00262	8.94e-05	0.00816435
HYNIP00454CG0060	mitochondrial glutamate carrier 1-like isoform X1	gi|1211282959|ref|XP_021425669.1|mitochondrial glutamate carrier 1-like [Oncorhynchus mykiss]/gi|642100473|emb|CDQ76897.1|unnamed protein product [Oncorhynchus mykiss]	0	300	0.9262	Oncorhynchus mykiss/Oncorhynchus mykiss	HYNIP00454CG0060	1.68879	6.96928	0.000127531	0.0103513			HYNIP00469CG0080	protein lin-54 homolog	gi|742241292|ref|XP_010862066.1|PREDICTED: protein lin-54 homolog isoform X1 [Esox lucius]/gi|742241294|ref|XP_010862067.1|PREDICTED: protein lin-54 homolog isoform X1 [Esox lucius]/gi|742241296|ref|XP_010862068.1|PREDICTED: protein lin-54 homolog isoform X1 [Esox lucius]	0	700	0.8438	Esox lucius/Esox lucius/Esox lucius	HYNIP00469CG0080	-1.49155	4.43918	9.18e-05	0.00826555
HYNIP00004CG0550	E3 ubiquitin-protein ligase AMFR	gi|1367407101|ref|XP_024260869.1|E3 ubiquitin-protein ligase AMFR-like [Oncorhynchus tshawytscha]/gi|1367407103|ref|XP_024260870.1|E3 ubiquitin-protein ligase AMFR-like [Oncorhynchus tshawytscha]	0	570	0.8901	Oncorhynchus tshawytscha/Oncorhynchus tshawytscha	HYNIP00004CG0550	1.68716	7.93808	5.83e-07	0.000153426			HYNIP01267CG0050	ankyrin repeat and LEM domain-containing protein 2-like	gi|966647555|gb|KTF82465.1|hypothetical protein cypCar_00035731 [Cyprinus carpio]	2.8e-154	370	0.5836	Cyprinus carpio	HYNIP01267CG0050	-1.47605	4.33184	0.000352734	0.0210823
HYNIP00085CG0490	Leucine-rich repeat-containing protein 2	gi|1515226299|gb|ROL53697.1|Leucine-rich repeat-containing protein 2 [Anabarilius grahami]	1e-67	160	0.6367	Anabarilius grahami	HYNIP00085CG0490	1.68647	8.7836	1.8e-06	0.000387761			HYNIP00181CG0420	GTPase-activating protein and VPS9 domain-containing protein 1 isoform X1	gi|657532235|ref|XP_008304153.1|PREDICTED: GTPase-activating protein and VPS9 domain-containing protein 1 isoform X1 [Stegastes partitus]	0	500	0.7194	Stegastes partitus	HYNIP00181CG0420	-1.47542	5.32994	7.66e-05	0.00740198
HYNIP00653CG0030	receptor-type tyrosine-protein phosphatase beta isoform X1	gi|1316071257|ref|XP_023207003.1|receptor-type tyrosine-protein phosphatase beta isoform X1 [Xiphophorus maculatus]	0	1800	0.5711	Xiphophorus maculatus	HYNIP00653CG0030	1.67152	4.98259	1.09e-05	0.00159626			HYNIP00240CG0120	bromodomain-containing protein 9 isoform X1	gi|742159718|ref|XP_010882741.1|PREDICTED: bromodomain-containing protein 9 isoform X3 [Esox lucius]	0	610	0.9025	Esox lucius	HYNIP00240CG0120	-1.46816	4.24593	2.73e-05	0.00325905
HYNIP00709CG0050	---NA---						HYNIP00709CG0050	1.67082	1.61146	0.000947645	0.0416742			HYNIP00060CG0180	transmembrane protein 131 isoform X1	gi|1079800839|ref|XP_018525358.1|PREDICTED: transmembrane protein 131 isoform X1 [Lates calcarifer]	0	1300	0.7877	Lates calcarifer	HYNIP00060CG0180	-1.46813	6.46103	0.000108474	0.00902734
HYNIP00514CG0030	mucin-2 isoform X6	gi|1472974360|ref|XP_026214149.1|mucin-2-like [Anabas testudineus]	1.2e-33	120	0.5385	Anabas testudineus	HYNIP00514CG0030	1.66595	2.24145	0.000710818	0.0341947			HYNIP00002CG0710	N-acylethanolamine-hydrolyzing acid amidase	gi|1469953627|ref|XP_026162999.1|LOW QUALITY PROTEIN: N-acylethanolamine-hydrolyzing acid amidase [Mastacembelus armatus]	0	310	0.8789	Mastacembelus armatus	HYNIP00002CG0710	-1.45596	7.55774	0.000267946	0.0178844
HYNIP00034CG0090	B-cell receptor CD22-like isoform X1	gi|1357677086|ref|XP_024123877.1|uncharacterized protein LOC112143880 [Oryzias melastigma]	3.8e-40	100	0.6849	Oryzias melastigma	HYNIP00034CG0090	1.65919	2.48181	0.000447026	0.024289			HYNIP00985CG0020	protein phosphatase 1 regulatory subunit 12B-like	gi|1367428449|ref|XP_024239377.1|protein phosphatase 1 regulatory subunit 12B-like isoform X1 [Oncorhynchus tshawytscha]	1.2e-47	110	0.7431	Oncorhynchus tshawytscha	HYNIP00985CG0020	-1.45523	4.86708	8.49e-05	0.00791408
HYNIP00130CG0080	---NA---						HYNIP00130CG0080	1.65814	3.57333	2.51e-05	0.00305318			HYNIP00148CG0090	heterogeneous nuclear ribonucleoprotein Q isoform X1	gi|1083268003|ref|XP_018588593.1|PREDICTED: heterogeneous nuclear ribonucleoprotein Q isoform X1 [Scleropages formosus]	0	580	0.9328	Scleropages formosus	HYNIP00148CG0090	-1.45241	4.04535	9.41e-05	0.00830522
HYNIP00761CG0030	homeobox protein MOX-1-like	gi|1158924241|ref|XP_020309964.1|homeobox protein MOX-1-like [Oncorhynchus kisutch]	3e-156	230	0.8797	Oncorhynchus kisutch	HYNIP00761CG0030	1.64917	5.33828	0.000126363	0.0103202			HYNIP00721CG0050	espin-like protein	gi|1308677258|ref|XP_023120745.1|espin-like protein [Amphiprion ocellaris]	0	560	0.7686	Amphiprion ocellaris	HYNIP00721CG0050	-1.44575	3.90037	0.000214798	0.0149797
HYNIP01654CG0010	protein phosphatase 1K, mitochondrial-like	gi|1199324088|ref|XP_021168929.1|protein phosphatase 1K, mitochondrial [Fundulus heteroclitus]	2e-69	200	0.5682	Fundulus heteroclitus	HYNIP01654CG0010	1.64823	6.64045	4.95e-05	0.00529666			HYNIP01617CG0010	glutathione synthetase	gi|1342979988|ref|XP_023846873.1|glutathione synthetase [Salvelinus alpinus]	3.5e-109	170	0.8942	Salvelinus alpinus	HYNIP01617CG0010	-1.43865	6.14134	0.000321044	0.0198188
HYNIP00020CG0240	endoplasmic reticulum-Golgi intermediate compartment protein 1 isoform X2	gi|1049256716|ref|XP_017567998.1|PREDICTED: endoplasmic reticulum-Golgi intermediate compartment protein 1 [Pygocentrus nattereri]	1.3e-104	170	0.7311	Pygocentrus nattereri	HYNIP00020CG0240	1.62773	4.1595	4.16e-05	0.00464045			HYNIP00025CG0080	elastase-1-like	gi|1049242428|ref|XP_017560192.1|PREDICTED: elastase-1-like [Pygocentrus nattereri]	1.5e-104	180	0.8544	Pygocentrus nattereri	HYNIP00025CG0080	-1.43379	5.93173	0.000107366	0.00899206
HYNIP00942CG0100	thioredoxin-interacting protein-like	gi|1367533456|ref|XP_024251442.1|thioredoxin-interacting protein-like [Oncorhynchus tshawytscha]	0	380	0.9571	Oncorhynchus tshawytscha	HYNIP00942CG0100	1.62287	10.8252	5.86e-06	0.000987305			HYNIP00470CG0050	cyclin-dependent kinase 13	gi|1343052643|ref|XP_023828786.1|cyclin-dependent kinase 13 isoform X2 [Salvelinus alpinus]	0	480	0.7465	Salvelinus alpinus	HYNIP00470CG0050	-1.41117	6.5265	0.000153624	0.011922
HYNIP00221CG0130	alpha-N-acetylgalactosaminide alpha-2,6-sialyltransferase 3-like	gi|1342956464|ref|XP_023840251.1|alpha-N-acetylgalactosaminide alpha-2,6-sialyltransferase 3 [Salvelinus alpinus]	4.9e-156	230	0.8731	Salvelinus alpinus	HYNIP00221CG0130	1.61048	2.63903	0.000583838	0.0295376			HYNIP00019CG0360	LIM domain kinase 1-like	gi|1308569340|ref|XP_023153109.1|LIM domain kinase 1-like [Amphiprion ocellaris]	0	540	0.7898	Amphiprion ocellaris	HYNIP00019CG0360	-1.40383	6.09436	0.00120864	0.0486006
HYNIP00202CG0120	growth hormone receptor-like	gi|213512991|ref|NP_001135089.1|somatolactin receptor precursor [Salmo salar]/gi|165970329|gb|ABY76179.1|somatolactin receptor precursor [Salmo salar]	0	470	0.7432	Salmo salar/Salmo salar	HYNIP00202CG0120	1.60783	4.36944	7.96e-05	0.00753307			HYNIP00244CG0110	solute carrier family 26 member 6-like	gi|1348547757|ref|XP_023992639.1|solute carrier family 26 member 6-like [Salvelinus alpinus]	8.4e-177	410	0.6395	Salvelinus alpinus	HYNIP00244CG0110	-1.39761	5.99605	0.000751355	0.0359257
HYNIP00288CG0180	insulin receptor substrate 2-like isoform X1	gi|1228975184|ref|XP_022051394.1|insulin receptor substrate 2-like isoform X2 [Acanthochromis polyacanthus]	0	920	0.8553	Acanthochromis polyacanthus	HYNIP00288CG0180	1.58916	5.6704	9.03e-05	0.00819313			HYNIP00007CG0650	pecanex-like protein 1 isoform X2	gi|1395244598|gb|AWP16105.1|putative pecanex-like protein 1 [Scophthalmus maximus]	0	650	0.8963	Scophthalmus maximus	HYNIP00007CG0650	-1.39291	3.24032	0.0012194	0.0487352
HYNIP00030CG0290	---NA---						HYNIP00030CG0290	1.58749	3.48247	0.000704311	0.0341734			HYNIP00070CG0180	E3 ubiquitin-protein ligase RNF25 isoform X2	gi|213515388|ref|NP_001134001.1|E3 ubiquitin-protein ligase RNF25 [Salmo salar]/gi|209156118|gb|ACI34291.1|E3 ubiquitin-protein ligase RNF25 [Salmo salar]	2.9e-125	260	0.6434	Salmo salar/Salmo salar	HYNIP00070CG0180	-1.38202	6.24777	7.64e-05	0.00740198
HYNIP00048CG0460	retinol dehydrogenase 8-like	gi|1079743890|ref|XP_018541386.1|PREDICTED: retinol dehydrogenase 8-like [Lates calcarifer]/gi|1079743892|ref|XP_018541387.1|PREDICTED: retinol dehydrogenase 8-like [Lates calcarifer]/gi|1079743894|ref|XP_018541388.1|PREDICTED: retinol dehydrogenase 8-like [Lates calcarifer]/gi|1079781019|ref|XP_018560590.1|PREDICTED: retinol dehydrogenase 8-like [Lates calcarifer]/gi|1079781021|ref|XP_018560591.…	0	300	0.9219	Lates calcarifer/Lates calcarifer/Lates calcarifer/Lates calcarifer/Lates calcarifer/Lates calcarifer	HYNIP00048CG0460	1.5771	3.58724	0.000892968	0.0407083			HYNIP00981CG0070	glycosyltransferase PglE	gi|1174981192|ref|WP_081654337.1|hypothetical protein [Leptospira inadai]	1.9e-07	36	0.72	Leptospira inadai	HYNIP00981CG0070	-1.37067	5.86459	9.81e-05	0.00838509
HYNIP00126CG0090	chromobox protein homolog 7-like	gi|1158890547|ref|XP_020349807.1|chromobox protein homolog 7 [Oncorhynchus kisutch]	2.1e-105	190	0.8348	Oncorhynchus kisutch	HYNIP00126CG0090	1.57678	6.23892	0.000438241	0.0241131			HYNIP00197CG0190	SRSF protein kinase 3-like	gi|259155138|ref|NP_001158810.1|Serine/threonine-protein kinase SRPK3 [Salmo salar]/gi|223647520|gb|ACN10518.1|Serine/threonine-protein kinase SRPK3 [Salmo salar]	1e-179	350	0.7314	Salmo salar/Salmo salar	HYNIP00197CG0190	-1.36596	5.05782	6.7e-05	0.00667184
HYNIP00169CG0290	NHS-like protein 1	gi|1308438702|ref|XP_023140231.1|NHS-like protein 1 [Amphiprion ocellaris]	1.7e-76	370	0.5124	Amphiprion ocellaris	HYNIP00169CG0290	1.57379	3.24754	0.000813162	0.0376488			HYNIP00247CG0210	zinc finger protein 703-like	gi|1367507431|ref|XP_024237792.1|zinc finger protein 703-like [Oncorhynchus tshawytscha]	0	440	0.8271	Oncorhynchus tshawytscha	HYNIP00247CG0210	-1.35497	3.5678	0.000293409	0.018835
HYNIP00380CG0050	peripheral myelin protein 22	gi|1169034510|ref|XP_020469516.1|peripheral myelin protein 22 [Monopterus albus]	3.1e-69	140	0.7219	Monopterus albus	HYNIP00380CG0050	1.56668	6.94179	0.000138686	0.011052			HYNIP01068CG0050	coiled-coil domain-containing protein 61-like isoform X2	gi|642127504|emb|CDQ60137.1|unnamed protein product [Oncorhynchus mykiss]	0	420	0.8301	Oncorhynchus mykiss	HYNIP01068CG0050	-1.3278	3.33196	0.000818834	0.0377784
HYNIP00023CG0060	sodium-coupled neutral amino acid transporter 2-like	gi|823267771|gb|AKI29972.1|neutral amino acid transporter 2 [Siniperca chuatsi]	0	450	0.9351	Siniperca chuatsi	HYNIP00023CG0060	1.56432	6.09409	8.84e-05	0.00816435			HYNIP00897CG0110	rabankyrin-5 isoform X1	gi|1143374961|ref|XP_019941222.1|PREDICTED: rabankyrin-5 isoform X1 [Paralichthys olivaceus]	0	680	0.9274	Paralichthys olivaceus	HYNIP00897CG0110	-1.3163	5.58498	0.00029508	0.018835
HYNIP00647CG0100	6-phosphofructo-2-kinase/fructose-2,6-bisphosphatase 3-like isoform X1	gi|742225737|ref|XP_010899611.1|PREDICTED: 6-phosphofructo-2-kinase/fructose-2,6-bisphosphatase 3 isoform X4 [Esox lucius]	0	440	0.9689	Esox lucius	HYNIP00647CG0100	1.55301	8.42533	0.000357196	0.0211566			HYNIP00074CG0160	kinesin-like protein KIF13B isoform X1	gi|657568681|ref|XP_008287785.1|PREDICTED: kinesin-like protein KIF13B [Stegastes partitus]	0	600	0.6345	Stegastes partitus	HYNIP00074CG0160	-1.31244	6.42053	0.000265748	0.0178282
HYNIP00043CG0140	neuronal cell adhesion molecule-like isoform X11	gi|929253904|ref|XP_014003244.1|PREDICTED: neuronal cell adhesion molecule-like isoform X11 [Salmo salar]	0	880	0.8205	Salmo salar	HYNIP00043CG0140	1.53871	4.60011	0.000278153	0.0183791			HYNIP01261CG0060	protein FAM214B	gi|1229021297|ref|XP_022075310.1|protein FAM214B [Acanthochromis polyacanthus]/gi|1229021299|ref|XP_022075311.1|protein FAM214B [Acanthochromis polyacanthus]/gi|1229021301|ref|XP_022075312.1|protein FAM214B [Acanthochromis polyacanthus]/gi|1229021303|ref|XP_022075313.1|protein FAM214B [Acanthochromis polyacanthus]	3.7e-143	220	0.9132	Acanthochromis polyacanthus/Acanthochromis polyacanthus/Acanthochromis polyacanthus/Acanthochromis polyacanthus	HYNIP01261CG0060	-1.29573	4.4081	0.000443345	0.024289
HYNIP00222CG0200	---NA---						HYNIP00222CG0200	1.5338	5.15457	7.87e-05	0.00750177			HYNIP00122CG0350	zinc finger Y-chromosomal protein 1-like isoform X1	gi|1469992721|ref|XP_026184006.1|zinc finger Y-chromosomal protein 1-like isoform X1 [Mastacembelus armatus]	0	690	0.9227	Mastacembelus armatus	HYNIP00122CG0350	-1.28724	4.07083	0.000654451	0.0325681
HYNIP00082CG0370	myelin-associated glycoprotein isoform X1	gi|1079771039|ref|XP_018555339.1|PREDICTED: myelin-associated glycoprotein-like isoform X1 [Lates calcarifer]	0	600	0.9434	Lates calcarifer	HYNIP00082CG0370	1.52927	4.4242	0.000389595	0.0223702			HYNIP00203CG0230	PREDICTED: uncharacterized protein LOC108880627	gi|1079805333|ref|XP_018527730.1|PREDICTED: uncharacterized protein LOC108880627 [Lates calcarifer]/gi|1079805335|ref|XP_018527731.1|PREDICTED: uncharacterized protein LOC108880627 [Lates calcarifer]	4.1e-133	340	0.6311	Lates calcarifer/Lates calcarifer	HYNIP00203CG0230	-1.28063	4.27327	0.000762728	0.0361439
HYNIP00042CG0250	RB1-inducible coiled-coil protein 1 isoform X1	gi|742087676|ref|XP_010884177.1|PREDICTED: RB1-inducible coiled-coil protein 1 isoform X2 [Esox lucius]	2.7e-83	150	0.8947	Esox lucius	HYNIP00042CG0250	1.52851	5.7002	2.48e-05	0.00304958			HYNIP01633CG0020	histone-lysine N-methyltransferase PRDM9-like	gi|1079717868|ref|XP_018521744.1|PREDICTED: LOW QUALITY PROTEIN: histone-lysine N-methyltransferase PRDM9-like [Lates calcarifer]	0	600	0.6034	Lates calcarifer	HYNIP01633CG0020	-1.25199	4.83107	0.000669185	0.0330794
HYNIP01797CG0040	NAD-dependent malic enzyme, mitochondrial	gi|1395235652|gb|AWP07263.1|putative NAD-dependent malic enzyme mitochondrial [Scophthalmus maximus]	3.4e-78	130	0.9203	Scophthalmus maximus	HYNIP01797CG0040	1.52333	3.9733	0.000334737	0.0203771			HYNIP00289CG0110	2-oxoglutarate dehydrogenase, mitochondrial isoform X1	gi|1079714478|ref|XP_018549718.1|PREDICTED: 2-oxoglutarate dehydrogenase, mitochondrial isoform X3 [Lates calcarifer]	0	570	0.8894	Lates calcarifer	HYNIP00289CG0110	-1.25015	5.06584	0.00120619	0.0486006
HYNIP00026CG0520	tubulin--tyrosine ligase	gi|1079734785|ref|XP_018536562.1|PREDICTED: tubulin--tyrosine ligase [Lates calcarifer]	0	340	0.9628	Lates calcarifer	HYNIP00026CG0520	1.52303	4.46599	5.01e-05	0.005309			HYNIP00839CG0060	importin-9	gi|1367428351|ref|XP_024238929.1|importin-9 [Oncorhynchus tshawytscha]	0	350	0.8228	Oncorhynchus tshawytscha	HYNIP00839CG0060	-1.2455	4.27545	0.0012506	0.0496801
HYNIP00653CG0010	dual specificity protein phosphatase 8 isoform X2	gi|1129985968|ref|XP_019749690.1|PREDICTED: dual specificity protein phosphatase 8 isoform X2 [Hippocampus comes]	0	480	0.7993	Hippocampus comes	HYNIP00653CG0010	1.52256	5.14553	0.000503911	0.0268256			HYNIP00931CG0020	uncharacterized protein LOC112230292 isoform X2	gi|1367535051|ref|XP_024252290.1|uncharacterized protein LOC112230292 isoform X2 [Oncorhynchus tshawytscha]	4.6e-91	220	0.6338	Oncorhynchus tshawytscha	HYNIP00931CG0020	-1.21603	5.99043	0.000584057	0.0295376
HYNIP00005CG0340	TLC domain-containing protein 2	gi|584014775|ref|XP_006802161.1|PREDICTED: TLC domain-containing protein 2-like [Neolamprologus brichardi]	7.2e-74	120	0.952	Neolamprologus brichardi	HYNIP00005CG0340	1.52171	4.76297	0.00036672	0.0214311			HYNIP00428CG0170	N6-adenosine-methyltransferase catalytic subunit	gi|1317157013|ref|XP_023252592.1|N6-adenosine-methyltransferase catalytic subunit [Seriola lalandi dorsalis]	0	490	0.783	Seriola lalandi dorsalis	HYNIP00428CG0170	-1.19724	5.04038	0.000574385	0.0295376
HYNIP00269CG0100	thyroid receptor-interacting protein 6-like	gi|929269498|ref|XP_014011383.1|PREDICTED: thyroid receptor-interacting protein 6-like [Salmo salar]/gi|929269500|ref|XP_014011384.1|PREDICTED: thyroid receptor-interacting protein 6-like [Salmo salar]/gi|929269502|ref|XP_014011385.1|PREDICTED: thyroid receptor-interacting protein 6-like [Salmo salar]/gi|929269504|ref|XP_014011386.1|PREDICTED: thyroid receptor-interacting protein 6-like [Salmo sa…	0	450	0.7797	Salmo salar/Salmo salar/Salmo salar/Salmo salar/Salmo salar	HYNIP00269CG0100	1.50463	4.96909	7.67e-06	0.00118984			HYNIP00630CG0090	sodium-dependent phosphate transporter 2 isoform X1	gi|410923036|ref|XP_003974988.1|PREDICTED: sodium-dependent phosphate transporter 2 [Takifugu rubripes]/gi|768950040|ref|XP_011614118.1|PREDICTED: sodium-dependent phosphate transporter 2 [Takifugu rubripes]	0	580	0.913	Takifugu rubripes/Takifugu rubripes	HYNIP00630CG0090	-1.19197	6.75116	0.00113444	0.0467407
HYNIP00068CG0420	lipoxygenase homology domain-containing protein 1-like	gi|1079710629|ref|XP_018530270.1|PREDICTED: LOW QUALITY PROTEIN: lipoxygenase homology domain-containing protein 1-like [Lates calcarifer]	0	1400	0.8522	Lates calcarifer	HYNIP00068CG0420	1.50288	3.16953	0.00020892	0.0148491			HYNIP00390CG0150	probable dolichyl pyrophosphate Glc1Man9GlcNAc2 alpha-1,3-glucosyltransferase	gi|1343042217|ref|XP_023823188.1|probable dolichyl pyrophosphate Glc1Man9GlcNAc2 alpha-1,3-glucosyltransferase isoform X2 [Salvelinus alpinus]	0	480	0.9256	Salvelinus alpinus	HYNIP00390CG0150	-1.18173	4.4465	0.000696228	0.0339063
HYNIP00989CG0030	alpha N-terminal protein methyltransferase 1B	gi|1250138538|ref|XP_022608734.1|alpha N-terminal protein methyltransferase 1B [Seriola dumerili]	2.1e-121	180	0.9045	Seriola dumerili	HYNIP00989CG0030	1.49421	3.66171	0.000549494	0.0286718			HYNIP00216CG0090	---NA---						HYNIP00216CG0090	-1.16848	5.08357	0.00099556	0.0429201
HYNIP00180CG0190	---NA---						HYNIP00180CG0190	1.4822	5.46602	2.47e-05	0.00304958			HYNIP00047CG0570	SUN domain-containing ossification factor isoform X2	gi|1248979362|ref|XP_022518169.1|SUN domain-containing ossification factor isoform X4 [Astyanax mexicanus]	0	1500	0.662	Astyanax mexicanus	HYNIP00047CG0570	-1.1651	6.31588	0.00105467	0.0445911
HYNIP00170CG0170	maternal B9.15 protein-like	gi|1248999682|ref|XP_007250871.2|protein BTG3-like [Astyanax mexicanus]	3.5e-113	220	0.7439	Astyanax mexicanus	HYNIP00170CG0170	1.47984	4.53096	0.00021685	0.0150072			HYNIP01172CG0080	histone-binding protein RBBP7 isoform X2	gi|1563843139|gb|RXM32695.1|Histone-binding protein RBBP7 [Acipenser ruthenus]	0	420	0.9976	Acipenser ruthenus	HYNIP01172CG0080	-1.14697	7.33354	0.000923762	0.0410292
HYNIP00632CG0120	E3 ubiquitin-protein ligase NEDD4 isoform X3	gi|929129296|ref|XP_013982415.1|PREDICTED: E3 ubiquitin-protein ligase NEDD4-like isoform X1 [Salmo salar]	0	620	0.879	Salmo salar	HYNIP00632CG0120	1.47949	5.93727	0.000382475	0.0221021			HYNIP01005CG0100	E3 ubiquitin-protein ligase RBBP6-like isoform X2	gi|1174641585|ref|XP_020559913.1|E3 ubiquitin-protein ligase RBBP6 isoform X2 [Oryzias latipes]	6.3e-148	460	0.5542	Oryzias latipes	HYNIP01005CG0100	-1.06819	5.86385	0.00113824	0.0467407
HYNIP00536CG0180	A disintegrin and metalloproteinase with thrombospondin motifs 8	gi|1343041406|ref|XP_023822763.1|A disintegrin and metalloproteinase with thrombospondin motifs 8-like [Salvelinus alpinus]	0	750	0.7868	Salvelinus alpinus	HYNIP00536CG0180	1.47828	4.88134	4.24e-05	0.00468833
HYNIP00725CG0010	cysteine-rich protein 1	gi|1025192591|ref|XP_016403518.1|PREDICTED: cysteine-rich protein 1-like [Sinocyclocheilus rhinocerous]	5e-28	54	0.9153	Sinocyclocheilus rhinocerous	HYNIP00725CG0010	1.47357	3.75186	0.000757767	0.036101
HYNIP00007CG0170	SAM and SH3 domain-containing protein 1-like isoform X1	gi|1469930275|ref|XP_026157167.1|SAM and SH3 domain-containing protein 1-like isoform X3 [Mastacembelus armatus]/gi|1469930277|ref|XP_026157177.1|SAM and SH3 domain-containing protein 1-like isoform X3 [Mastacembelus armatus]	0	480	0.804	Mastacembelus armatus/Mastacembelus armatus	HYNIP00007CG0170	1.46657	4.16818	0.000416547	0.0235072
HYNIP00617CG0040	nuclear receptor ROR-beta-like	gi|929120602|ref|XP_014071928.1|PREDICTED: nuclear receptor ROR-beta-like [Salmo salar]/gi|929120604|ref|XP_014071929.1|PREDICTED: nuclear receptor ROR-beta-like [Salmo salar]	0	400	0.8298	Salmo salar/Salmo salar	HYNIP00617CG0040	1.4654	4.85755	0.000521383	0.0275328
HYNIP00346CG0180	neuronal PAS domain-containing protein 2-like isoform X1	gi|1158873742|ref|XP_020340807.1|neuronal PAS domain-containing protein 2-like [Oncorhynchus kisutch]	0	430	0.7343	Oncorhynchus kisutch	HYNIP00346CG0180	1.46515	5.97299	0.000917351	0.040889
HYNIP00291CG0150	tensin-like isoform X1	gi|1188091849|ref|XP_020792265.1|LOW QUALITY PROTEIN: tensin-like [Boleophthalmus pectinirostris]	2.2e-116	200	0.7787	Boleophthalmus pectinirostris	HYNIP00291CG0150	1.45915	3.7604	0.000589463	0.0296967
HYNIP01180CG0010	striatin-4 isoform X2	gi|1472946785|ref|XP_026228736.1|striatin-4 isoform X2 [Anabas testudineus]	0	410	0.7366	Anabas testudineus	HYNIP01180CG0010	1.45736	5.60127	0.000769663	0.0361439
HYNIP00016CG0420	cathepsin B-like	gi|225708580|gb|ACO10136.1|Cathepsin B precursor [Osmerus mordax]	0	310	0.9364	Osmerus mordax	HYNIP00016CG0420	1.4538	3.93176	0.000278051	0.0183791
HYNIP00263CG0120	KN motif and ankyrin repeat domain-containing protein 1 isoform X1	gi|1228973962|ref|XP_022050737.1|KN motif and ankyrin repeat domain-containing protein 1 [Acanthochromis polyacanthus]	0	320	0.8777	Acanthochromis polyacanthus	HYNIP00263CG0120	1.44056	5.3336	1.66e-05	0.00224099
HYNIP00077CG0170	43 kDa receptor-associated protein of the synapse	gi|1348573089|ref|XP_023998034.1|43 kDa receptor-associated protein of the synapse [Salvelinus alpinus]	0	330	0.9792	Salvelinus alpinus	HYNIP00077CG0170	1.43763	5.3165	5.71e-05	0.00586287
HYNIP00376CG0030	C-myc promoter-binding protein isoform X1	gi|1079711795|ref|XP_018536610.1|PREDICTED: LOW QUALITY PROTEIN: C-myc promoter-binding protein [Lates calcarifer]	0	860	0.7666	Lates calcarifer	HYNIP00376CG0030	1.41819	3.99141	0.000148694	0.0117076
HYNIP00554CG0080	apoptosis regulator Bcl-2-like	gi|1158918506|ref|XP_020364460.1|apoptosis regulator Bcl-2-like isoform X2 [Oncorhynchus kisutch]	3e-91	150	0.8042	Oncorhynchus kisutch	HYNIP00554CG0080	1.41291	3.60247	0.00034895	0.0210475
HYNIP00039CG0200	transmembrane and coiled-coil domains protein 1 isoform X1	gi|1308407386|ref|XP_023128903.1|transmembrane and coiled-coil domains protein 1 isoform X1 [Amphiprion ocellaris]/gi|1308407389|ref|XP_023128904.1|transmembrane and coiled-coil domains protein 1 isoform X1 [Amphiprion ocellaris]/gi|1308407394|ref|XP_023128905.1|transmembrane and coiled-coil domains protein 1 isoform X1 [Amphiprion ocellaris]	0	570	0.8465	Amphiprion ocellaris/Amphiprion ocellaris/Amphiprion ocellaris	HYNIP00039CG0200	1.40953	4.55732	0.000656366	0.0325681
HYNIP00021CG0570	xin actin-binding repeat-containing protein 1-like isoform X1	gi|1211403663|ref|XP_021469799.1|xin actin-binding repeat-containing protein 1-like [Oncorhynchus mykiss]	0	1500	0.7935	Oncorhynchus mykiss	HYNIP00021CG0570	1.3986	6.53245	0.00121374	0.0486567
HYNIP01063CG0010	protein numb homolog isoform X1	gi|1079793154|ref|XP_018521748.1|PREDICTED: protein numb homolog isoform X1 [Lates calcarifer]	0	420	0.7925	Lates calcarifer	HYNIP01063CG0010	1.38703	4.0357	0.0010756	0.04502
HYNIP00396CG0010	LIM domain-binding protein 2 isoform X4	gi|1035251581|ref|XP_016895021.1|LIM domain-binding protein 2 isoform X6 [Cynoglossus semilaevis]	1.6e-120	180	0.8792	Cynoglossus semilaevis	HYNIP00396CG0010	1.38591	3.82568	0.0011764	0.0480133
HYNIP00180CG0110	serine/threonine-protein kinase SIK2-like	gi|1250111726|ref|XP_022596621.1|serine/threonine-protein kinase SIK2-like [Seriola dumerili]/gi|1317119811|ref|XP_023271661.1|serine/threonine-protein kinase SIK2-like [Seriola lalandi dorsalis]	0	590	0.7239	Seriola dumerili/Seriola lalandi dorsalis	HYNIP00180CG0110	1.38437	5.76806	0.000232979	0.0160278
HYNIP00006CG0170	receptor-type tyrosine-protein phosphatase alpha	gi|1239960307|ref|XP_022265086.1|receptor-type tyrosine-protein phosphatase alpha isoform X3 [Canis lupus familiaris]/gi|1418250564|ref|XP_025325282.1|receptor-type tyrosine-protein phosphatase alpha isoform X3 [Canis lupus dingo]	0	450	0.8392	Canis lupus familiaris/Canis lupus dingo	HYNIP00006CG0170	1.38396	3.09712	0.000969261	0.0422014
HYNIP00005CG0150	serine/threonine-protein kinase ULK2-like isoform X1	gi|742194466|ref|XP_010891565.1|PREDICTED: serine/threonine-protein kinase ULK2 isoform X1 [Esox lucius]	0	960	0.854	Esox lucius	HYNIP00005CG0150	1.38019	8.25163	0.000446709	0.024289
HYNIP00215CG0170	V-type proton ATPase subunit C 1-A	gi|1564331167|gb|RXN27542.1|V-type proton ATPase subunit C 1-A [Labeo rohita]	0	320	0.8286	Labeo rohita	HYNIP00215CG0170	1.36583	5.70417	3.27e-05	0.00383644
HYNIP00305CG0020	homeobox protein Hox-B4a-like	gi|831328227|ref|XP_012697315.1|PREDICTED: homeobox protein Hox-B4 [Clupea harengus]	6.4e-158	230	0.9243	Clupea harengus	HYNIP00305CG0020	1.36547	3.70672	0.00117943	0.0480133
HYNIP00095CG0050	cingulin-like protein 1	gi|1079776222|ref|XP_018558093.1|PREDICTED: cingulin-like protein 1 [Lates calcarifer]	2.1e-107	190	0.9238	Lates calcarifer	HYNIP00095CG0050	1.36478	6.16314	0.000767794	0.0361439
HYNIP00452CG0190	F-box only protein 34-like	gi|1342989336|ref|XP_023849862.1|F-box only protein 34 isoform X2 [Salvelinus alpinus]	0	500	0.5917	Salvelinus alpinus	HYNIP00452CG0190	1.36355	5.54959	8.93e-05	0.00816435
HYNIP00919CG0050	rho GTPase-activating protein 11A-like isoform X2	gi|1158903787|ref|XP_020356665.1|rho GTPase-activating protein 11A-like isoform X3 [Oncorhynchus kisutch]	0	670	0.6876	Oncorhynchus kisutch	HYNIP00919CG0050	1.36209	7.10368	0.000806967	0.0376039
HYNIP00024CG0530	cell division control protein 42 homolog isoform X1	gi|1508629010|gb|RNA00483.1|Cell division control [Brachionus plicatilis]	1.4e-135	240	0.6897	Brachionus plicatilis	HYNIP00024CG0530	1.361	6.35488	0.000710107	0.0341947
HYNIP00026CG0380	PDZ and LIM domain protein 1	gi|225706486|gb|ACO09089.1|PDZ and LIM domain protein 1 [Osmerus mordax]	1.9e-121	170	0.9942	Osmerus mordax	HYNIP00026CG0380	1.35871	7.29046	0.000252078	0.0169978
HYNIP00292CG0180	charged multivesicular body protein 1b	gi|225706626|gb|ACO09159.1|Charged multivesicular body protein 1b-2 [Osmerus mordax]	2.6e-135	200	0.9899	Osmerus mordax	HYNIP00292CG0180	1.35293	4.31586	0.000912477	0.040889
HYNIP00721CG0040	kelch-like protein 30	gi|736216945|ref|XP_010778809.1|PREDICTED: kelch-like protein 30 isoform X2 [Notothenia coriiceps]	6.6e-150	240	0.8561	Notothenia coriiceps	HYNIP00721CG0040	1.35234	8.16167	0.000156009	0.0119962
HYNIP00085CG0480	hippocampus abundant transcript-like protein 1	gi|657600100|ref|XP_008304889.1|PREDICTED: hippocampus abundant transcript 1 protein-like [Stegastes partitus]/gi|657600116|ref|XP_008304898.1|PREDICTED: hippocampus abundant transcript 1 protein-like [Stegastes partitus]	0	300	0.9161	Stegastes partitus/Stegastes partitus	HYNIP00085CG0480	1.35093	3.87834	0.00068569	0.0335172
HYNIP00034CG0330	serine/threonine-protein kinase 40	gi|1250159068|ref|XP_022619984.1|serine/threonine-protein kinase 40 isoform X1 [Seriola dumerili]/gi|1317118526|ref|XP_023271017.1|serine/threonine-protein kinase 40 isoform X1 [Seriola lalandi dorsalis]	0	430	0.9795	Seriola dumerili/Seriola lalandi dorsalis	HYNIP00034CG0330	1.34779	4.16183	0.00042695	0.0239353
HYNIP00463CG0060	anoctamin-5-like isoform X2	gi|1367479620|ref|XP_024296159.1|anoctamin-5-like isoform X3 [Oncorhynchus tshawytscha]	1.2e-156	250	0.8715	Oncorhynchus tshawytscha	HYNIP00463CG0060	1.33961	4.98975	0.000171162	0.0127875
HYNIP00114CG0100	vinculin isoform X2	gi|1168934697|ref|XP_020510614.1|vinculin [Labrus bergylta]	0	1000	0.9779	Labrus bergylta	HYNIP00114CG0100	1.3368	5.27825	0.000930714	0.041067
HYNIP01040CG0060	histone-lysine N-methyltransferase, H3 lysine-36 and H4 lysine-20 specific	gi|1529865708|ref|XP_010753198.3|histone-lysine N-methyltransferase, H3 lysine-36 and H4 lysine-20 specific [Larimichthys crocea]/gi|1529865710|ref|XP_019121032.2|histone-lysine N-methyltransferase, H3 lysine-36 and H4 lysine-20 specific [Larimichthys crocea]/gi|1529865713|ref|XP_019121033.2|histone-lysine N-methyltransferase, H3 lysine-36 and H4 lysine-20 specific [Larimichthys crocea]	0	1100	0.6182	Larimichthys crocea/Larimichthys crocea/Larimichthys crocea	HYNIP01040CG0060	1.32099	4.21521	0.000207696	0.0148491
HYNIP00105CG0360	arylsulfatase G	gi|1348557561|ref|XP_024001944.1|arylsulfatase G isoform X2 [Salvelinus alpinus]	0	400	0.8879	Salvelinus alpinus	HYNIP00105CG0360	1.30296	6.7371	0.000151737	0.0118762
HYNIP00128CG0250	plastin-3	gi|929086690|ref|XP_014053950.1|PREDICTED: plastin-3-like [Salmo salar]	0	530	0.8523	Salmo salar	HYNIP00128CG0250	1.29019	5.52753	0.000234036	0.0160278
HYNIP00197CG0110	interleukin-1 receptor-associated kinase 1-like	gi|1211277712|ref|XP_021422837.1|interleukin-1 receptor-associated kinase 1-like [Oncorhynchus mykiss]	0	410	0.6415	Oncorhynchus mykiss	HYNIP00197CG0110	1.28558	4.57131	0.000488989	0.026167
HYNIP01625CG0010	nuclear factor erythroid 2-related factor 1-like	gi|1343037080|ref|XP_023868622.1|endoplasmic reticulum membrane sensor NFE2L1 isoform X1 [Salvelinus alpinus]	0	560	0.6924	Salvelinus alpinus	HYNIP01625CG0010	1.27443	9.00163	0.0003794	0.022074
HYNIP00143CG0040	uveal autoantigen with coiled-coil domains and ankyrin repeats	gi|1211376937|ref|XP_021463644.1|uveal autoantigen with coiled-coil domains and ankyrin repeats [Oncorhynchus mykiss]	0	1100	0.8272	Oncorhynchus mykiss	HYNIP00143CG0040	1.26616	6.69214	0.000901698	0.0407875
HYNIP00058CG0100	anion exchange protein 2-like isoform X1	gi|929273099|ref|XP_014013218.1|PREDICTED: anion exchange protein 2-like isoform X2 [Salmo salar]	0	820	0.8734	Salmo salar	HYNIP00058CG0100	1.25136	4.91156	0.000768229	0.0361439
HYNIP00089CG0140	histone-arginine methyltransferase CARM1	gi|736222775|ref|XP_010780312.1|PREDICTED: histone-arginine methyltransferase CARM1-like, partial [Notothenia coriiceps]	8.6e-87	140	0.7747	Notothenia coriiceps	HYNIP00089CG0140	1.24715	6.57799	0.000675048	0.0332442
HYNIP00042CG0260	RB1-inducible coiled-coil protein 1 isoform X1	gi|1343060226|ref|XP_023832762.1|RB1-inducible coiled-coil protein 1 isoform X3 [Salvelinus alpinus]	0	1100	0.8446	Salvelinus alpinus	HYNIP00042CG0260	1.24597	6.01404	0.000573334	0.0295376
HYNIP00182CG0130	TSC22 domain family protein 1-like isoform X3	gi|929303835|ref|XP_014029399.1|PREDICTED: TSC22 domain family protein 1 isoform X4 [Salmo salar]	1.4e-72	120	0.8864	Salmo salar	HYNIP00182CG0130	1.2406	4.63266	0.00029489	0.018835
HYNIP00013CG0190	mucosa-associated lymphoid tissue lymphoma translocation protein 1-like	gi|929255460|ref|XP_014004056.1|PREDICTED: mucosa-associated lymphoid tissue lymphoma translocation protein 1-like [Salmo salar]/gi|929255462|ref|XP_014004057.1|PREDICTED: mucosa-associated lymphoid tissue lymphoma translocation protein 1-like [Salmo salar]	0	440	0.8566	Salmo salar/Salmo salar	HYNIP00013CG0190	1.2312	4.69005	0.00051014	0.0270477
HYNIP00023CG0240	T-complex protein 11-like protein 2	gi|1367490041|ref|XP_024301700.1|T-complex protein 11-like protein 2 isoform X1 [Oncorhynchus tshawytscha]/gi|1367490043|ref|XP_024301701.1|T-complex protein 11-like protein 2 isoform X1 [Oncorhynchus tshawytscha]	0	440	0.8519	Oncorhynchus tshawytscha/Oncorhynchus tshawytscha	HYNIP00023CG0240	1.21985	5.4059	0.0010674	0.0449049
HYNIP01248CG0040	hypoxia-inducible factor 1-alpha-like isoform X1	gi|1215455307|gb|OXB57044.1|hypothetical protein ASZ78_000613 [Callipepla squamata]	1e-60	140	0.7435	Callipepla squamata	HYNIP01248CG0040	1.21981	6.01977	0.000427773	0.0239353
HYNIP00067CG0030	trichohyalin-like isoform X1	gi|1143394765|ref|XP_019951902.1|PREDICTED: trichohyalin-like isoform X1 [Paralichthys olivaceus]/gi|1143394768|ref|XP_019951903.1|PREDICTED: trichohyalin-like isoform X1 [Paralichthys olivaceus]	0	510	0.5687	Paralichthys olivaceus/Paralichthys olivaceus	HYNIP00067CG0030	1.21823	4.82303	0.000894723	0.0407083
HYNIP00934CG0060	charged multivesicular body protein 2b	gi|1250111272|ref|XP_022596372.1|charged multivesicular body protein 2b [Seriola dumerili]/gi|1317121309|ref|XP_023272452.1|charged multivesicular body protein 2b [Seriola lalandi dorsalis]	6.5e-132	200	0.9709	Seriola dumerili/Seriola lalandi dorsalis	HYNIP00934CG0060	1.21743	3.75827	0.00103723	0.0442808
HYNIP00067CG0300	protein TASOR-like isoform X1	gi|1250108683|ref|XP_022594968.1|protein TASOR-like isoform X3 [Seriola dumerili]	0	650	0.7258	Seriola dumerili	HYNIP00067CG0300	1.19005	5.12231	0.00104079	0.0442892
HYNIP00992CG0060	hypothetical protein EGW08_002149, partial	gi|1547102197|gb|RUS90107.1|hypothetical protein EGW08_002149, partial [Elysia chlorotica]	8.3e-07	47	0.5663	Elysia chlorotica	HYNIP00992CG0060	1.16713	4.01675	0.00103639	0.0442808
HYNIP00011CG0090	BTB/POZ domain-containing protein 10 isoform X1	gi|657816225|ref|XP_008335231.1|BTB/POZ domain-containing protein 10 isoform X1 [Cynoglossus semilaevis]	0	460	0.9177	Cynoglossus semilaevis	HYNIP00011CG0090	1.13106	6.07636	0.00110989	0.0460376
HYNIP00532CG0140	proto-oncogene tyrosine-protein kinase ROS	gi|1249057636|ref|XP_022529022.1|proto-oncogene tyrosine-protein kinase ROS [Astyanax mexicanus]	2.4e-129	320	0.6515	Astyanax mexicanus	HYNIP00532CG0140	1.11337	5.38167	0.00096697	0.0422014
HYNIP00593CG0070	egl nine homolog 2-like	gi|1211316201|ref|XP_021437505.1|uncharacterized protein LOC110503496 isoform X1 [Oncorhynchus mykiss]	0	500	0.7394	Oncorhynchus mykiss	HYNIP00593CG0070	1.11166	6.21423	0.000909821	0.040889
HYNIP00100CG0070	Transmembrane protein 134	gi|229366120|gb|ACQ58040.1|Transmembrane protein 134 [Anoplopoma fimbria]	5.5e-128	190	0.9038	Anoplopoma fimbria	HYNIP00100CG0070	1.09706	4.75073	0.000916712	0.040889
